# Supplementary material for: Changes in Gene Expression during Adaptation of Listeria monocytogenes to the Soil Environment
Source: PubMed Central journal article supplement (PMC3179493; doi:10.1371/journal.pone.0024881), 2011-09-23
Supplement: pone.0024881.s001.pdf [file pone.0024881.s001.pdf]

Table S1. Genes over 2-fold change at time 15 minutes.

|         |            |
|---------|------------|
| LMO0003 | 3.509 down |
| LMO0008 | 2.044 down |
| LMO0009 | 2.421 down |
| LMO0010 | 2.130 down |
| LMO0013 | 2.265 down |
| LMO0017 | 2.607 down |
| LMO0020 | 2.705 up   |
| LMO0021 | 11.202 up  |
| LMO0022 | 19.035 up  |
| LMO0023 | 15.139 up  |
| LMO0024 | 19.291 up  |
| LMO0025 | 2.012 up   |
| LMO0027 | 18.344 up  |
| LMO0029 | 2.469 down |
| LMO0030 | 2.300 down |
| LMO0033 | 2.197 down |
| LMO0034 | 3.182 down |
| LMO0035 | 2.436 down |
| LMO0038 | 2.182 up   |
| LMO0039 | 2.448 up   |
| LMO0042 | 3.013 down |
| LMO0046 | 2.201 down |
| LMO0050 | 2.458 down |
| LMO0051 | 2.030 down |
| LMO0055 | 3.381 down |
| LMO0071 | 2.432 down |
| LMO0072 | 3.150 down |
| LMO0073 | 3.185 down |
| LMO0074 | 2.706 down |
| LMO0075 | 2.743 down |
| LMO0077 | 2.515 down |
| LMO0079 | 2.075 down |
| LMO0083 | 2.381 up   |
| LMO0102 | 2.104 down |
| LMO0105 | 34.138 up  |
| LMO0106 | 4.663 down |
| LMO0109 | 2.592 up   |
| LMO0110 | 2.542 up   |
| LMO0111 | 3.297 down |
| LMO0112 | 3.074 down |
| LMO0113 | 3.519 up   |
| LMO0114 | 2.460 up   |
| LMO0132 | 2.284 down |
| LMO0133 | 2.363 up   |
| LMO0134 | 2.804 up   |
| LMO0135 | 2.227 down |

|         |            |
|---------|------------|
| LMO0136 | 2.138 down |
| LMO0137 | 2.141 down |
| LMO0138 | 2.760 down |
| LMO0139 | 2.880 down |
| LMO0140 | 2.211 down |
| LMO0142 | 2.600 down |
| LMO0143 | 2.273 down |
| LMO0144 | 4.034 down |
| LMO0145 | 4.683 down |
| LMO0146 | 2.493 down |
| LMO0151 | 7.528 down |
| LMO0152 | 8.297 down |
| LMO0153 | 7.921 down |
| LMO0154 | 5.646 down |
| LMO0159 | 2.523 down |
| LMO0160 | 2.601 down |
| LMO0167 | 2.016 down |
| LMO0168 | 2.846 down |
| LMO0176 | 3.646 down |
| LMO0181 | 2.024 up   |
| LMO0185 | 4.702 down |
| LMO0186 | 6.153 down |
| LMO0187 | 3.731 down |
| LMO0189 | 2.820 down |
| LMO0190 | 4.450 down |
| LMO0192 | 2.797 down |
| LMO0198 | 3.283 down |
| LMO0199 | 4.068 down |
| LMO0213 | 2.469 down |
| LMO0218 | 2.672 down |
| LMO0219 | 2.858 down |
| LMO0221 | 2.056 down |
| LMO0222 | 2.514 down |
| LMO0223 | 2.544 down |
| LMO0238 | 3.616 down |
| LMO0239 | 3.039 down |
| LMO0240 | 2.751 down |
| LMO0241 | 2.985 down |
| LMO0242 | 2.245 down |
| LMO0243 | 3.546 down |
| LMO0244 | 6.199 down |
| LMO0245 | 9.249 down |
| LMO0246 | 4.269 down |
| LMO0247 | 2.750 down |
| LMO0248 | 2.261 down |
| LMO0252 | 4.319 down |
| LMO0254 | 2.328 down |
| LMO0256 | 2.770 down |

|         |            |
|---------|------------|
| LMO0262 | 2.389 down |
| LMO0265 | 2.270 up   |
| LMO0269 | 6.234 down |
| LMO0272 | 3.492 down |
| LMO0273 | 4.570 down |
| LMO0274 | 3.439 up   |
| LMO0278 | 3.867 up   |
| LMO0279 | 2.946 up   |
| LMO0280 | 2.062 up   |
| LMO0282 | 4.449 down |
| LMO0283 | 4.326 down |
| LMO0284 | 6.166 down |
| LMO0285 | 8.352 down |
| LMO0286 | 9.158 down |
| LMO0287 | 2.045 down |
| LMO0288 | 3.196 down |
| LMO0289 | 2.139 down |
| LMO0293 | 4.388 down |
| LMO0294 | 4.031 down |
| LMO0297 | 2.332 up   |
| LMO0298 | 13.358 up  |
| LMO0299 | 13.398 up  |
| LMO0300 | 11.617 up  |
| LMO0301 | 17.073 up  |
| LMO0302 | 3.316 down |
| LMO0303 | 2.224 down |
| LMO0304 | 2.162 down |
| LMO0306 | 2.827 down |
| LMO0307 | 2.452 down |
| LMO0315 | 2.650 down |
| LMO0316 | 2.716 down |
| LMO0319 | 2.193 up   |
| LMO0320 | 2.862 down |
| LMO0323 | 3.948 up   |
| LMO0326 | 2.128 down |
| LMO0327 | 2.152 down |
| LMO0333 | 2.304 down |
| LMO0344 | 2.317 up   |
| LMO0345 | 2.632 up   |
| LMO0346 | 4.276 up   |
| LMO0347 | 3.007 up   |
| LMO0348 | 4.088 up   |
| LMO0349 | 4.717 up   |
| LMO0350 | 4.933 up   |
| LMO0351 | 7.184 up   |
| LMO0357 | 2.209 up   |
| LMO0364 | 6.892 down |
| LMO0365 | 4.697 down |

|         |             |
|---------|-------------|
| LMO0366 | 2.521 down  |
| LMO0367 | 2.127 down  |
| LMO0371 | 4.514 down  |
| LMO0377 | 2.191 up    |
| LMO0383 | 7.233 up    |
| LMO0384 | 6.414 up    |
| LMO0385 | 3.668 up    |
| LMO0386 | 3.020 up    |
| LMO0390 | 3.298 down  |
| LMO0394 | 12.132 down |
| LMO0395 | 5.441 down  |
| LMO0396 | 2.478 down  |
| LMO0398 | 4.494 up    |
| LMO0399 | 3.859 up    |
| LMO0400 | 6.875 up    |
| LMO0401 | 19.291 up   |
| LMO0402 | 2.473 up    |
| LMO0403 | 2.220 down  |
| LMO0404 | 2.221 down  |
| LMO0412 | 2.266 down  |
| LMO0420 | 2.374 down  |
| LMO0430 | 2.786 down  |
| LMO0434 | 2.617 up    |
| LMO0435 | 2.024 down  |
| LMO0436 | 3.392 down  |
| LMO0440 | 2.302 down  |
| LMO0442 | 2.592 down  |
| LMO0449 | 2.653 down  |
| LMO0450 | 3.094 down  |
| LMO0451 | 2.309 down  |
| LMO0452 | 2.286 down  |
| LMO0453 | 2.535 down  |
| LMO0454 | 2.872 down  |
| LMO0455 | 2.795 down  |
| LMO0465 | 4.445 down  |
| LMO0468 | 2.033 down  |
| LMO0469 | 9.239 down  |
| LMO0470 | 4.272 down  |
| LMO0471 | 2.647 up    |
| LMO0472 | 2.304 down  |
| LMO0473 | 2.633 down  |
| LMO0476 | 2.032 down  |
| LMO0477 | 10.879 down |
| LMO0478 | 11.019 down |
| LMO0479 | 3.846 down  |
| LMO0480 | 2.571 down  |
| LMO0482 | 4.403 down  |
| LMO0485 | 10.003 down |

|         |             |
|---------|-------------|
| LMO0486 | 3.765 down  |
| LMO0489 | 2.498 down  |
| LMO0492 | 2.389 down  |
| LMO0494 | 2.031 down  |
| LMO0495 | 3.847 down  |
| LMO0496 | 2.259 up    |
| LMO0497 | 3.891 down  |
| LMO0501 | 3.185 up    |
| LMO0502 | 4.322 up    |
| LMO0503 | 2.766 up    |
| LMO0504 | 2.543 up    |
| LMO0509 | 4.562 down  |
| LMO0510 | 3.862 down  |
| LMO0511 | 3.546 down  |
| LMO0513 | 2.037 down  |
| LMO0514 | 12.522 down |
| LMO0515 | 2.990 up    |
| LMO0517 | 10.613 up   |
| LMO0519 | 5.133 down  |
| LMO0520 | 2.636 down  |
| LMO0522 | 2.070 down  |
| LMO0532 | 2.016 down  |
| LMO0536 | 5.450 up    |
| LMO0537 | 2.238 down  |
| LMO0541 | 2.141 down  |
| LMO0543 | 3.289 up    |
| LMO0544 | 14.110 up   |
| LMO0545 | 11.899 up   |
| LMO0546 | 3.676 up    |
| LMO0547 | 2.346 down  |
| LMO0549 | 2.378 down  |
| LMO0550 | 3.280 down  |
| LMO0551 | 2.253 down  |
| LMO0552 | 2.923 down  |
| LMO0559 | 3.199 down  |
| LMO0573 | 2.711 down  |
| LMO0581 | 4.708 down  |
| LMO0582 | 4.708 down  |
| LMO0583 | 2.505 down  |
| LMO0584 | 2.929 up    |
| LMO0585 | 4.437 down  |
| LMO0586 | 5.393 down  |
| LMO0588 | 4.266 down  |
| LMO0589 | 2.366 down  |
| LMO0597 | 3.181 down  |
| LMO0598 | 4.602 down  |
| LMO0599 | 2.946 down  |
| LMO0600 | 2.748 down  |

|         |            |
|---------|------------|
| LMO0601 | 2.829 down |
| LMO0602 | 3.455 up   |
| LMO0604 | 5.633 down |
| LMO0608 | 2.661 up   |
| LMO0609 | 3.923 down |
| LMO0611 | 3.367 down |
| LMO0616 | 2.225 down |
| LMO0622 | 2.752 down |
| LMO0623 | 2.091 down |
| LMO0629 | 2.153 up   |
| LMO0630 | 6.815 up   |
| LMO0631 | 4.174 up   |
| LMO0632 | 4.421 up   |
| LMO0633 | 3.209 up   |
| LMO0634 | 3.111 up   |
| LMO0635 | 6.685 down |
| LMO0636 | 3.157 down |
| LMO0637 | 2.145 down |
| LMO0638 | 5.909 down |
| LMO0640 | 2.295 up   |
| LMO0643 | 6.213 up   |
| LMO0644 | 2.912 down |
| LMO0645 | 3.518 down |
| LMO0655 | 2.078 down |
| LMO0656 | 7.545 down |
| LMO0657 | 2.521 down |
| LMO0658 | 2.360 down |
| LMO0660 | 2.877 up   |
| LMO0664 | 2.568 down |
| LMO0665 | 2.417 down |
| LMO0666 | 2.468 down |
| LMO0667 | 2.126 down |
| LMO0668 | 2.239 down |
| LMO0672 | 5.841 down |
| LMO0678 | 5.114 down |
| LMO0679 | 6.455 down |
| LMO0680 | 7.974 down |
| LMO0681 | 4.252 down |
| LMO0682 | 4.254 down |
| LMO0683 | 7.304 down |
| LMO0684 | 5.106 down |
| LMO0685 | 2.726 down |
| LMO0686 | 2.007 down |
| LMO0691 | 2.438 down |
| LMO0692 | 2.286 down |
| LMO0693 | 3.365 down |
| LMO0694 | 2.698 down |
| LMO0696 | 2.062 down |

|         |            |
|---------|------------|
| LMO0720 | 2.378 up   |
| LMO0721 | 3.170 down |
| LMO0725 | 5.403 down |
| LMO0726 | 7.710 down |
| LMO0727 | 5.306 down |
| LMO0728 | 2.639 down |
| LMO0733 | 2.967 down |
| LMO0739 | 2.293 down |
| LMO0740 | 2.510 down |
| LMO0745 | 2.074 down |
| LMO0748 | 2.857 down |
| LMO0749 | 2.381 down |
| LMO0751 | 2.232 down |
| LMO0752 | 2.188 down |
| LMO0755 | 2.550 down |
| LMO0756 | 2.175 down |
| LMO0765 | 3.248 down |
| LMO0766 | 2.356 down |
| LMO0767 | 2.490 down |
| LMO0769 | 2.114 down |
| LMO0770 | 3.038 down |
| LMO0771 | 5.064 down |
| LMO0772 | 5.292 down |
| LMO0773 | 2.140 down |
| LMO0777 | 4.742 down |
| LMO0778 | 6.784 down |
| LMO0779 | 3.129 down |
| LMO0781 | 2.470 up   |
| LMO0785 | 2.380 down |
| LMO0787 | 2.362 down |
| LMO0788 | 2.743 down |
| LMO0790 | 3.220 down |
| LMO0791 | 4.192 down |
| LMO0793 | 2.929 down |
| LMO0795 | 3.445 down |
| LMO0796 | 2.209 up   |
| LMO0801 | 2.114 down |
| LMO0802 | 6.802 down |
| LMO0806 | 2.856 down |
| LMO0814 | 4.934 down |
| LMO0815 | 3.643 down |
| LMO0816 | 3.250 down |
| LMO0817 | 3.603 down |
| LMO0818 | 2.731 down |
| LMO0831 | 2.002 down |
| LMO0833 | 3.444 down |
| LMO0834 | 5.139 down |
| LMO0835 | 4.256 down |

|         |            |
|---------|------------|
| LMO0836 | 4.512 down |
| LMO0837 | 6.276 down |
| LMO0839 | 2.428 down |
| LMO0840 | 2.814 down |
| LMO0841 | 2.146 down |
| LMO0842 | 3.804 down |
| LMO0845 | 2.400 down |
| LMO0847 | 6.130 down |
| LMO0848 | 6.606 down |
| LMO0850 | 3.389 down |
| LMO0851 | 3.385 down |
| LMO0852 | 4.030 down |
| LMO0853 | 2.574 down |
| LMO0854 | 2.626 down |
| LMO0855 | 2.141 down |
| LMO0857 | 2.258 down |
| LMO0866 | 3.447 down |
| LMO0867 | 3.549 down |
| LMO0869 | 3.084 up   |
| LMO0870 | 2.569 up   |
| LMO0873 | 3.685 up   |
| LMO0874 | 4.725 up   |
| LMO0875 | 4.492 up   |
| LMO0876 | 3.433 up   |
| LMO0877 | 2.685 up   |
| LMO0878 | 3.251 up   |
| LMO0879 | 3.296 up   |
| LMO0882 | 3.777 down |
| LMO0883 | 3.055 down |
| LMO0884 | 2.762 down |
| LMO0885 | 2.055 down |
| LMO0887 | 2.033 down |
| LMO0888 | 2.288 down |
| LMO0889 | 2.331 down |
| LMO0890 | 2.486 down |
| LMO0891 | 2.562 down |
| LMO0899 | 4.584 down |
| LMO0903 | 4.318 down |
| LMO0908 | 2.516 down |
| LMO0912 | 2.190 down |
| LMO0914 | 23.186 up  |
| LMO0915 | 21.540 up  |
| LMO0916 | 35.521 up  |
| LMO0917 | 60.712 up  |
| LMO0918 | 3.780 up   |
| LMO0920 | 4.366 down |
| LMO0921 | 2.406 down |
| LMO0922 | 2.299 down |



|         |            |
|---------|------------|
| LMO0927 | 2.662 down |
| LMO0928 | 3.205 down |
| LMO0934 | 2.375 down |
| LMO0935 | 2.288 down |
| LMO0939 | 3.601 down |
| LMO0948 | 2.062 down |
| LMO0950 | 2.063 down |
| LMO0951 | 2.891 down |
| LMO0952 | 3.760 down |
| LMO0957 | 2.650 up   |
| LMO0958 | 2.791 up   |
| LMO0959 | 2.480 down |
| LMO0960 | 2.797 down |
| LMO0961 | 2.188 down |
| LMO0966 | 2.075 down |
| LMO0967 | 2.301 down |
| LMO0968 | 2.705 down |
| LMO0969 | 2.368 down |
| LMO0974 | 2.336 down |
| LMO0975 | 2.440 down |
| LMO0981 | 2.947 down |
| LMO0983 | 2.023 up   |
| LMO0988 | 2.492 down |
| LMO0997 | 5.180 up   |
| LMO0998 | 9.823 down |
| LMO0999 | 2.254 down |
| LMO1000 | 3.393 down |
| LMO1001 | 4.605 down |
| LMO1004 | 2.981 down |
| LMO1006 | 2.350 down |
| LMO1008 | 3.517 down |
| LMO1009 | 2.102 down |
| LMO1011 | 2.195 down |
| LMO1013 | 2.348 down |
| LMO1014 | 6.032 down |
| LMO1015 | 3.471 down |
| LMO1016 | 2.767 down |
| LMO1017 | 2.370 down |
| LMO1024 | 3.873 down |
| LMO1025 | 3.111 down |
| LMO1030 | 2.591 down |
| LMO1037 | 4.734 down |
| LMO1039 | 2.171 down |
| LMO1043 | 2.465 up   |
| LMO1044 | 2.254 up   |
| LMO1045 | 2.683 up   |
| LMO1046 | 3.348 up   |
| LMO1047 | 3.054 up   |

|         |            |
|---------|------------|
| LMO1048 | 3.366 up   |
| LMO1049 | 2.105 up   |
| LMO1056 | 3.257 down |
| LMO1064 | 2.205 down |
| LMO1065 | 2.172 down |
| LMO1066 | 2.807 down |
| LMO1067 | 3.764 down |
| LMO1068 | 3.070 up   |
| LMO1070 | 2.327 down |
| LMO1071 | 3.099 down |
| LMO1073 | 6.184 down |
| LMO1074 | 3.767 down |
| LMO1076 | 2.989 down |
| LMO1077 | 3.372 down |
| LMO1078 | 5.478 down |
| LMO1079 | 5.005 down |
| LMO1080 | 2.486 down |
| LMO1086 | 2.042 down |
| LMO1088 | 2.107 down |
| LMO1089 | 2.425 down |
| LMO1090 | 2.581 down |
| LMO1091 | 2.370 down |
| LMO1092 | 2.200 down |
| LMO1093 | 2.058 down |
| LMO1096 | 2.070 down |
| LMO1113 | 2.735 up   |
| LMO1114 | 2.655 up   |
| LMO1119 | 2.340 down |
| LMO1120 | 3.832 down |
| LMO1122 | 2.143 down |
| LMO1123 | 3.107 down |
| LMO1128 | 2.926 down |
| LMO1129 | 2.568 down |
| LMO1130 | 2.261 down |
| LMO1131 | 4.210 down |
| LMO1132 | 2.304 down |
| LMO1134 | 2.422 down |
| LMO1135 | 3.397 down |
| LMO1136 | 4.214 down |
| LMO1137 | 3.292 up   |
| LMO1138 | 2.280 up   |
| LMO1140 | 2.466 up   |
| LMO1141 | 2.797 down |
| LMO1144 | 2.662 down |
| LMO1145 | 2.415 down |
| LMO1146 | 2.527 down |
| LMO1147 | 2.732 down |
| LMO1148 | 2.747 down |

|         |             |
|---------|-------------|
| LMO1149 | 3.784 down  |
| LMO1169 | 2.994 down  |
| LMO1170 | 3.780 down  |
| LMO1175 | 3.298 down  |
| LMO1177 | 2.301 down  |
| LMO1178 | 2.340 down  |
| LMO1179 | 2.545 down  |
| LMO1180 | 2.381 down  |
| LMO1181 | 2.968 down  |
| LMO1182 | 2.489 down  |
| LMO1183 | 2.966 down  |
| LMO1184 | 2.819 down  |
| LMO1185 | 3.055 down  |
| LMO1186 | 2.107 down  |
| LMO1197 | 2.697 down  |
| LMO1198 | 2.494 down  |
| LMO1199 | 2.731 down  |
| LMO1200 | 3.493 down  |
| LMO1201 | 3.828 down  |
| LMO1202 | 4.182 down  |
| LMO1203 | 2.896 down  |
| LMO1204 | 4.132 down  |
| LMO1205 | 3.111 down  |
| LMO1206 | 2.808 down  |
| LMO1207 | 2.412 down  |
| LMO1208 | 2.191 down  |
| LMO1210 | 3.807 down  |
| LMO1211 | 3.581 down  |
| LMO1216 | 3.566 down  |
| LMO1221 | 2.613 down  |
| LMO1222 | 2.609 down  |
| LMO1223 | 3.665 down  |
| LMO1228 | 2.343 down  |
| LMO1229 | 2.764 down  |
| LMO1230 | 2.334 down  |
| LMO1231 | 2.175 down  |
| LMO1235 | 3.519 down  |
| LMO1236 | 4.194 down  |
| LMO1237 | 8.958 down  |
| LMO1238 | 6.185 down  |
| LMO1239 | 11.778 down |
| LMO1240 | 6.501 down  |
| LMO1241 | 2.366 up    |
| LMO1243 | 2.256 down  |
| LMO1245 | 4.452 down  |
| LMO1246 | 3.852 down  |
| LMO1247 | 4.311 down  |
| LMO1248 | 13.616 down |

|         |             |
|---------|-------------|
| LMO1249 | 6.265 down  |
| LMO1250 | 3.120 down  |
| LMO1251 | 11.667 down |
| LMO1252 | 3.142 down  |
| LMO1254 | 2.167 up    |
| LMO1256 | 2.998 up    |
| LMO1270 | 2.071 down  |
| LMO1271 | 2.228 down  |
| LMO1272 | 2.051 down  |
| LMO1274 | 2.590 down  |
| LMO1275 | 5.129 down  |
| LMO1276 | 2.425 down  |
| LMO1284 | 2.931 down  |
| LMO1286 | 3.083 down  |
| LMO1291 | 2.067 down  |
| LMO1292 | 4.130 down  |
| LMO1293 | 2.898 up    |
| LMO1294 | 2.894 down  |
| LMO1296 | 3.670 down  |
| LMO1297 | 2.812 down  |
| LMO1298 | 9.011 down  |
| LMO1300 | 2.214 down  |
| LMO1306 | 3.641 down  |
| LMO1307 | 4.683 down  |
| LMO1308 | 2.947 down  |
| LMO1309 | 4.427 down  |
| LMO1310 | 7.753 down  |
| LMO1311 | 7.994 down  |
| LMO1312 | 4.096 down  |
| LMO1313 | 3.569 down  |
| LMO1314 | 2.639 down  |
| LMO1315 | 4.527 down  |
| LMO1316 | 3.548 down  |
| LMO1317 | 2.381 down  |
| LMO1321 | 2.350 down  |
| LMO1322 | 2.396 down  |
| LMO1323 | 2.049 down  |
| LMO1326 | 2.398 down  |
| LMO1327 | 2.743 down  |
| LMO1328 | 3.994 down  |
| LMO1329 | 2.270 down  |
| LMO1330 | 2.739 down  |
| LMO1331 | 7.413 down  |
| LMO1334 | 2.328 down  |
| LMO1335 | 3.221 down  |
| LMO1336 | 2.253 down  |
| LMO1337 | 2.100 down  |
| LMO1347 | 2.109 down  |

|         |             |
|---------|-------------|
| LMO1348 | 4.328 up    |
| LMO1349 | 7.360 up    |
| LMO1350 | 3.829 up    |
| LMO1351 | 2.558 down  |
| LMO1352 | 2.933 down  |
| LMO1353 | 11.720 down |
| LMO1355 | 2.261 down  |
| LMO1356 | 3.398 down  |
| LMO1357 | 2.281 down  |
| LMO1358 | 2.062 down  |
| LMO1359 | 2.290 down  |
| LMO1364 | 2.281 down  |
| LMO1365 | 3.805 down  |
| LMO1366 | 2.299 down  |
| LMO1369 | 4.663 down  |
| LMO1370 | 3.928 down  |
| LMO1375 | 2.132 down  |
| LMO1384 | 4.383 down  |
| LMO1385 | 3.101 down  |
| LMO1395 | 3.899 down  |
| LMO1396 | 4.582 down  |
| LMO1400 | 2.186 down  |
| LMO1401 | 2.205 down  |
| LMO1403 | 2.034 down  |
| LMO1409 | 4.185 down  |
| LMO1410 | 3.031 down  |
| LMO1411 | 2.708 down  |
| LMO1416 | 3.125 down  |
| LMO1417 | 4.568 down  |
| LMO1418 | 4.637 down  |
| LMO1419 | 5.928 down  |
| LMO1420 | 5.369 down  |
| LMO1424 | 2.571 down  |
| LMO1428 | 4.482 down  |
| LMO1429 | 14.980 down |
| LMO1430 | 4.569 down  |
| LMO1431 | 9.421 down  |
| LMO1436 | 2.494 down  |
| LMO1437 | 3.121 down  |
| LMO1438 | 2.024 down  |
| LMO1440 | 12.921 down |
| LMO1445 | 2.219 down  |
| LMO1446 | 4.930 down  |
| LMO1447 | 4.601 down  |
| LMO1449 | 2.553 down  |
| LMO1450 | 2.290 down  |
| LMO1459 | 2.319 down  |
| LMO1461 | 2.108 down  |

|         |            |
|---------|------------|
| LMO1463 | 2.005 down |
| LMO1464 | 2.129 down |
| LMO1468 | 2.760 down |
| LMO1476 | 3.034 down |
| LMO1478 | 2.215 down |
| LMO1479 | 2.189 down |
| LMO1480 | 2.907 down |
| LMO1481 | 2.004 down |
| LMO1483 | 3.737 down |
| LMO1485 | 5.664 down |
| LMO1486 | 3.828 down |
| LMO1487 | 2.930 down |
| LMO1488 | 2.925 down |
| LMO1489 | 2.929 down |
| LMO1490 | 3.206 down |
| LMO1491 | 3.753 down |
| LMO1492 | 7.301 down |
| LMO1494 | 2.414 down |
| LMO1495 | 2.302 down |
| LMO1496 | 3.420 down |
| LMO1497 | 2.329 down |
| LMO1498 | 3.794 down |
| LMO1499 | 3.812 down |
| LMO1500 | 4.812 down |
| LMO1504 | 2.477 down |
| LMO1506 | 2.648 down |
| LMO1511 | 2.069 down |
| LMO1512 | 2.752 down |
| LMO1513 | 3.451 down |
| LMO1515 | 8.155 down |
| LMO1519 | 2.346 down |
| LMO1520 | 3.509 down |
| LMO1521 | 2.988 down |
| LMO1523 | 2.194 down |
| LMO1524 | 2.853 down |
| LMO1528 | 2.123 down |
| LMO1530 | 2.141 down |
| LMO1532 | 2.033 down |
| LMO1536 | 4.297 down |
| LMO1537 | 5.266 down |
| LMO1538 | 3.467 up   |
| LMO1545 | 2.486 down |
| LMO1546 | 2.460 down |
| LMO1548 | 2.303 down |
| LMO1549 | 4.071 down |
| LMO1550 | 2.702 down |
| LMO1551 | 2.507 down |
| LMO1552 | 2.338 down |

|         |            |
|---------|------------|
| LMO1555 | 2.429 down |
| LMO1556 | 3.287 down |
| LMO1557 | 3.721 down |
| LMO1558 | 5.100 down |
| LMO1559 | 2.410 down |
| LMO1568 | 2.446 down |
| LMO1575 | 2.033 down |
| LMO1576 | 2.457 down |
| LMO1577 | 2.766 down |
| LMO1580 | 2.291 up   |
| LMO1581 | 2.125 down |
| LMO1582 | 2.499 down |
| LMO1584 | 3.597 down |
| LMO1585 | 5.861 down |
| LMO1589 | 2.314 up   |
| LMO1590 | 3.770 up   |
| LMO1591 | 4.317 up   |
| LMO1592 | 2.437 down |
| LMO1593 | 2.692 down |
| LMO1594 | 3.013 down |
| LMO1596 | 2.052 down |
| LMO1598 | 2.417 down |
| LMO1600 | 2.976 down |
| LMO1604 | 2.677 down |
| LMO1613 | 2.392 down |
| LMO1614 | 5.984 down |
| LMO1615 | 4.707 down |
| LMO1616 | 6.312 down |
| LMO1617 | 2.428 down |
| LMO1618 | 3.688 down |
| LMO1621 | 2.090 down |
| LMO1622 | 3.548 down |
| LMO1623 | 2.053 down |
| LMO1624 | 3.009 down |
| LMO1625 | 4.061 down |
| LMO1626 | 3.201 down |
| LMO1635 | 4.718 down |
| LMO1641 | 2.655 down |
| LMO1645 | 2.461 down |
| LMO1646 | 3.944 down |
| LMO1647 | 4.149 down |
| LMO1648 | 2.769 down |
| LMO1653 | 2.522 down |
| LMO1654 | 3.192 down |
| LMO1655 | 2.683 down |
| LMO1656 | 4.361 down |
| LMO1657 | 2.290 down |
| LMO1658 | 2.066 down |

|         |             |
|---------|-------------|
| LMO1660 | 2.973 down  |
| LMO1661 | 2.061 down  |
| LMO1662 | 3.258 down  |
| LMO1663 | 2.626 down  |
| LMO1664 | 6.152 down  |
| LMO1665 | 3.807 down  |
| LMO1668 | 2.375 down  |
| LMO1669 | 4.403 down  |
| LMO1670 | 4.128 down  |
| LMO1671 | 7.071 down  |
| LMO1676 | 2.620 down  |
| LMO1677 | 2.224 down  |
| LMO1681 | 2.070 down  |
| LMO1682 | 3.387 down  |
| LMO1687 | 2.301 down  |
| LMO1688 | 2.825 down  |
| LMO1689 | 5.568 down  |
| LMO1691 | 2.090 down  |
| LMO1692 | 3.012 down  |
| LMO1693 | 2.161 down  |
| LMO1695 | 2.275 down  |
| LMO1696 | 7.540 down  |
| LMO1697 | 3.757 down  |
| LMO1698 | 4.409 down  |
| LMO1706 | 2.387 down  |
| LMO1707 | 2.842 down  |
| LMO1708 | 3.061 down  |
| LMO1709 | 2.752 down  |
| LMO1710 | 3.987 down  |
| LMO1711 | 2.147 down  |
| LMO1713 | 2.270 down  |
| LMO1715 | 3.437 down  |
| LMO1718 | 4.872 up    |
| LMO1719 | 5.354 up    |
| LMO1720 | 5.168 up    |
| LMO1722 | 3.432 down  |
| LMO1723 | 3.356 down  |
| LMO1724 | 3.749 down  |
| LMO1725 | 3.938 down  |
| LMO1729 | 2.676 up    |
| LMO1730 | 11.181 up   |
| LMO1731 | 5.217 up    |
| LMO1732 | 2.885 up    |
| LMO1735 | 2.620 down  |
| LMO1736 | 2.476 down  |
| LMO1737 | 2.989 down  |
| LMO1738 | 15.882 down |
| LMO1739 | 17.405 down |



|         |             |
|---------|-------------|
| LMO1740 | 22.949 down |
| LMO1742 | 2.352 down  |
| LMO1743 | 2.237 down  |
| LMO1744 | 2.395 down  |
| LMO1747 | 2.714 down  |
| LMO1748 | 7.390 down  |
| LMO1749 | 5.809 down  |
| LMO1750 | 2.870 down  |
| LMO1751 | 2.006 down  |
| LMO1753 | 3.353 down  |
| LMO1761 | 6.186 down  |
| LMO1762 | 3.448 down  |
| LMO1764 | 3.540 up    |
| LMO1765 | 3.910 up    |
| LMO1766 | 2.463 up    |
| LMO1767 | 2.135 up    |
| LMO1768 | 2.079 up    |
| LMO1775 | 2.626 down  |
| LMO1776 | 3.248 down  |
| LMO1778 | 2.040 down  |
| LMO1779 | 6.367 down  |
| LMO1787 | 3.138 down  |
| LMO1791 | 4.467 up    |
| LMO1796 | 3.154 down  |
| LMO1797 | 2.448 down  |
| LMO1801 | 2.058 down  |
| LMO1802 | 2.674 down  |
| LMO1804 | 4.145 down  |
| LMO1805 | 6.963 down  |
| LMO1806 | 2.165 down  |
| LMO1807 | 2.214 down  |
| LMO1808 | 2.505 down  |
| LMO1809 | 6.084 down  |
| LMO1810 | 6.984 down  |
| LMO1811 | 2.786 down  |
| LMO1812 | 3.705 down  |
| LMO1813 | 2.214 down  |
| LMO1814 | 2.183 down  |
| LMO1815 | 3.442 down  |
| LMO1816 | 5.296 down  |
| LMO1817 | 3.009 down  |
| LMO1826 | 2.289 down  |
| LMO1827 | 2.291 down  |
| LMO1828 | 2.781 down  |
| LMO1830 | 2.456 up    |
| LMO1831 | 3.397 up    |
| LMO1832 | 2.143 up    |
| LMO1837 | 2.343 down  |

|         |             |
|---------|-------------|
| LMO1838 | 2.984 down  |
| LMO1839 | 4.038 down  |
| LMO1840 | 7.510 down  |
| LMO1841 | 6.120 down  |
| LMO1842 | 3.192 down  |
| LMO1847 | 2.498 down  |
| LMO1848 | 3.162 down  |
| LMO1849 | 3.240 down  |
| LMO1850 | 2.441 down  |
| LMO1851 | 2.984 down  |
| LMO1864 | 4.202 down  |
| LMO1865 | 5.108 down  |
| LMO1866 | 2.828 down  |
| LMO1869 | 2.439 down  |
| LMO1870 | 32.338 down |
| LMO1871 | 2.483 down  |
| LMO1872 | 3.211 down  |
| LMO1875 | 2.835 down  |
| LMO1878 | 2.936 down  |
| LMO1879 | 2.421 up    |
| LMO1880 | 3.321 down  |
| LMO1883 | 7.157 up    |
| LMO1884 | 3.259 down  |
| LMO1885 | 5.388 down  |
| LMO1887 | 2.787 down  |
| LMO1889 | 2.603 down  |
| LMO1890 | 2.493 down  |
| LMO1891 | 2.976 down  |
| LMO1892 | 2.485 down  |
| LMO1900 | 2.099 down  |
| LMO1901 | 2.117 down  |
| LMO1902 | 2.994 down  |
| LMO1903 | 4.508 down  |
| LMO1908 | 2.175 down  |
| LMO1909 | 3.043 down  |
| LMO1910 | 3.988 down  |
| LMO1911 | 11.150 down |
| LMO1915 | 3.247 down  |
| LMO1918 | 4.125 down  |
| LMO1920 | 2.196 down  |
| LMO1923 | 2.436 down  |
| LMO1925 | 3.310 down  |
| LMO1926 | 2.766 down  |
| LMO1927 | 2.849 down  |
| LMO1928 | 2.657 down  |
| LMO1932 | 2.557 down  |
| LMO1933 | 2.415 down  |
| LMO1936 | 2.406 down  |

|         |            |
|---------|------------|
| LMO1937 | 3.738 down |
| LMO1940 | 2.462 down |
| LMO1944 | 4.301 down |
| LMO1950 | 2.049 down |
| LMO1951 | 2.230 down |
| LMO1952 | 2.536 down |
| LMO1957 | 3.930 down |
| LMO1958 | 4.631 down |
| LMO1959 | 4.594 down |
| LMO1960 | 2.883 down |
| LMO1961 | 2.335 down |
| LMO1977 | 3.349 down |
| LMO1978 | 2.582 down |
| LMO1981 | 2.074 down |
| LMO1983 | 2.438 up   |
| LMO1984 | 4.107 up   |
| LMO1985 | 3.951 up   |
| LMO1986 | 4.822 up   |
| LMO1987 | 4.040 up   |
| LMO1988 | 3.317 up   |
| LMO1989 | 3.209 up   |
| LMO1990 | 3.662 up   |
| LMO1991 | 3.346 up   |
| LMO1992 | 2.197 up   |
| LMO1994 | 2.044 down |
| LMO1996 | 2.081 down |
| LMO1997 | 5.834 up   |
| LMO1998 | 4.561 up   |
| LMO1999 | 7.159 up   |
| LMO2000 | 10.236 up  |
| LMO2001 | 6.605 up   |
| LMO2002 | 8.015 up   |
| LMO2003 | 3.852 up   |
| LMO2004 | 3.296 up   |
| LMO2018 | 2.159 down |
| LMO2019 | 2.060 down |
| LMO2020 | 3.173 down |
| LMO2021 | 3.653 down |
| LMO2025 | 2.451 up   |
| LMO2029 | 2.170 down |
| LMO2034 | 2.351 down |
| LMO2035 | 2.956 down |
| LMO2037 | 2.147 down |
| LMO2038 | 2.841 down |
| LMO2039 | 2.564 down |
| LMO2040 | 3.369 down |
| LMO2041 | 6.144 down |
| LMO2042 | 7.077 down |

|         |            |
|---------|------------|
| LMO2044 | 3.355 down |
| LMO2045 | 4.645 down |
| LMO2046 | 5.505 down |
| LMO2047 | 2.211 down |
| LMO2048 | 5.943 down |
| LMO2049 | 2.015 down |
| LMO2050 | 2.984 up   |
| LMO2051 | 2.360 down |
| LMO2052 | 4.913 down |
| LMO2053 | 5.209 down |
| LMO2056 | 3.270 down |
| LMO2058 | 3.068 down |
| LMO2059 | 4.014 down |
| LMO2061 | 3.542 down |
| LMO2062 | 5.271 down |
| LMO2063 | 3.027 down |
| LMO2070 | 2.659 down |
| LMO2073 | 2.520 down |
| LMO2075 | 2.008 down |
| LMO2076 | 2.562 down |
| LMO2077 | 3.007 down |
| LMO2078 | 3.417 down |
| LMO2079 | 3.768 down |
| LMO2080 | 2.747 down |
| LMO2081 | 2.314 down |
| LMO2082 | 2.335 down |
| LMO2086 | 3.227 down |
| LMO2087 | 3.817 down |
| LMO2088 | 4.671 down |
| LMO2090 | 4.707 up   |
| LMO2091 | 5.961 up   |
| LMO2096 | 2.339 down |
| LMO2099 | 2.610 up   |
| LMO2100 | 6.071 down |
| LMO2103 | 2.096 down |
| LMO2104 | 5.258 down |
| LMO2105 | 5.288 down |
| LMO2106 | 3.608 down |
| LMO2111 | 2.298 down |
| LMO2112 | 2.489 down |
| LMO2114 | 4.994 down |
| LMO2115 | 3.891 down |
| LMO2116 | 2.151 down |
| LMO2117 | 2.244 down |
| LMO2118 | 4.136 down |
| LMO2121 | 9.319 up   |
| LMO2122 | 9.721 up   |
| LMO2123 | 11.361 up  |

|         |             |
|---------|-------------|
| LMO2124 | 10.151 up   |
| LMO2125 | 12.023 up   |
| LMO2126 | 2.538 up    |
| LMO2127 | 3.305 down  |
| LMO2128 | 2.639 down  |
| LMO2129 | 3.034 down  |
| LMO2131 | 2.445 down  |
| LMO2132 | 2.231 up    |
| LMO2135 | 2.749 up    |
| LMO2136 | 5.115 up    |
| LMO2137 | 5.052 up    |
| LMO2138 | 4.163 up    |
| LMO2144 | 3.381 down  |
| LMO2156 | 22.391 down |
| LMO2158 | 2.627 up    |
| LMO2159 | 2.336 up    |
| LMO2160 | 2.970 up    |
| LMO2161 | 3.610 up    |
| LMO2162 | 5.404 up    |
| LMO2163 | 6.220 up    |
| LMO2170 | 2.132 up    |
| LMO2171 | 5.184 up    |
| LMO2172 | 4.861 up    |
| LMO2175 | 7.305 up    |
| LMO2177 | 2.993 down  |
| LMO2179 | 2.167 down  |
| LMO2187 | 3.628 down  |
| LMO2197 | 10.774 down |
| LMO2202 | 6.457 down  |
| LMO2203 | 2.941 down  |
| LMO2207 | 3.858 down  |
| LMO2210 | 5.331 up    |
| LMO2211 | 2.272 down  |
| LMO2212 | 3.047 down  |
| LMO2213 | 2.514 up    |
| LMO2218 | 2.134 down  |
| LMO2223 | 2.287 down  |
| LMO2225 | 2.072 down  |
| LMO2233 | 3.575 down  |
| LMO2239 | 5.567 down  |
| LMO2240 | 5.039 down  |
| LMO2241 | 5.780 down  |
| LMO2243 | 3.378 down  |
| LMO2244 | 3.122 down  |
| LMO2248 | 2.120 down  |
| LMO2249 | 2.430 down  |
| LMO2259 | 2.339 down  |
| LMO2260 | 2.885 down  |

|         |             |
|---------|-------------|
| LMO2275 | 2.055 up    |
| LMO2278 | 2.376 up    |
| LMO2288 | 2.081 up    |
| LMO2299 | 2.068 up    |
| LMO2301 | 2.367 up    |
| LMO2302 | 2.345 up    |
| LMO2303 | 2.517 up    |
| LMO2304 | 2.212 up    |
| LMO2306 | 2.004 up    |
| LMO2320 | 2.267 up    |
| LMO2321 | 2.086 up    |
| LMO2325 | 2.108 up    |
| LMO2326 | 2.120 up    |
| LMO2327 | 2.387 up    |
| LMO2332 | 2.442 up    |
| LMO2337 | 2.123 down  |
| LMO2345 | 2.266 down  |
| LMO2346 | 2.141 down  |
| LMO2347 | 3.018 down  |
| LMO2348 | 3.934 down  |
| LMO2349 | 5.199 down  |
| LMO2350 | 7.589 down  |
| LMO2351 | 13.626 down |
| LMO2352 | 23.562 down |
| LMO2354 | 2.382 down  |
| LMO2355 | 3.979 down  |
| LMO2357 | 2.564 up    |
| LMO2365 | 2.942 down  |
| LMO2369 | 2.387 down  |
| LMO2374 | 3.074 down  |
| LMO2375 | 2.394 down  |
| LMO2377 | 6.045 down  |
| LMO2378 | 3.763 down  |
| LMO2379 | 2.538 down  |
| LMO2380 | 2.402 down  |
| LMO2381 | 2.208 down  |
| LMO2388 | 3.077 down  |
| LMO2390 | 2.265 down  |
| LMO2395 | 4.074 down  |
| LMO2396 | 2.070 down  |
| LMO2397 | 2.871 down  |
| LMO2408 | 2.534 down  |
| LMO2409 | 2.964 down  |
| LMO2410 | 2.392 down  |
| LMO2416 | 3.825 down  |
| LMO2418 | 3.007 down  |
| LMO2419 | 3.296 down  |
| LMO2424 | 3.694 down  |

|         |            |
|---------|------------|
| LMO2427 | 2.347 down |
| LMO2428 | 4.484 down |
| LMO2433 | 3.348 down |
| LMO2435 | 6.448 down |
| LMO2436 | 2.289 up   |
| LMO2439 | 2.187 down |
| LMO2442 | 2.637 down |
| LMO2443 | 6.852 down |
| LMO2450 | 2.050 down |
| LMO2460 | 2.972 down |
| LMO2464 | 5.407 down |
| LMO2465 | 5.510 down |
| LMO2466 | 7.547 down |
| LMO2467 | 2.298 down |
| LMO2469 | 2.302 down |
| LMO2475 | 2.389 down |
| LMO2476 | 2.896 down |
| LMO2477 | 2.292 down |
| LMO2487 | 2.307 up   |
| LMO2491 | 2.446 down |
| LMO2492 | 3.936 down |
| LMO2493 | 5.262 down |
| LMO2494 | 2.118 up   |
| LMO2503 | 2.508 down |
| LMO2504 | 6.397 down |
| LMO2505 | 4.205 down |
| LMO2506 | 5.313 down |
| LMO2507 | 4.428 down |
| LMO2509 | 2.112 down |
| LMO2511 | 3.764 up   |
| LMO2512 | 2.676 down |
| LMO2513 | 3.799 down |
| LMO2516 | 4.699 down |
| LMO2517 | 3.640 down |
| LMO2518 | 3.390 down |
| LMO2519 | 2.459 down |
| LMO2520 | 2.106 down |
| LMO2521 | 3.040 down |
| LMO2522 | 3.271 down |
| LMO2525 | 2.041 down |
| LMO2526 | 3.414 down |
| LMO2527 | 2.365 down |
| LMO2537 | 2.662 down |
| LMO2538 | 2.098 down |
| LMO2544 | 2.158 down |
| LMO2545 | 2.719 down |
| LMO2546 | 2.747 down |
| LMO2547 | 7.032 down |

|         |            |
|---------|------------|
| LMO2549 | 3.348 down |
| LMO2550 | 4.297 down |
| LMO2551 | 4.932 down |
| LMO2552 | 2.412 down |
| LMO2558 | 2.825 down |
| LMO2559 | 5.051 down |
| LMO2561 | 3.415 down |
| LMO2562 | 3.036 down |
| LMO2563 | 2.842 down |
| LMO2566 | 2.269 down |
| LMO2567 | 3.985 up   |
| LMO2568 | 2.095 up   |
| LMO2569 | 2.462 down |
| LMO2570 | 2.112 up   |
| LMO2574 | 2.104 up   |
| LMO2576 | 2.348 down |
| LMO2577 | 2.155 down |
| LMO2584 | 3.283 up   |
| LMO2585 | 7.101 up   |
| LMO2586 | 7.368 up   |
| LMO2587 | 3.661 down |
| LMO2591 | 9.855 down |
| LMO2596 | 2.817 down |
| LMO2597 | 2.042 down |
| LMO2601 | 2.183 down |
| LMO2603 | 2.421 up   |
| LMO2628 | 2.052 down |
| LMO2629 | 2.000 down |
| LMO2634 | 2.154 down |
| LMO2645 | 40.633 up  |
| LMO2646 | 32.680 up  |
| LMO2647 | 53.486 up  |
| LMO2648 | 47.191 up  |
| LMO2649 | 32.946 up  |
| LMO2650 | 26.143 up  |
| LMO2651 | 33.435 up  |
| LMO2661 | 8.132 up   |
| LMO2662 | 8.669 up   |
| LMO2663 | 9.744 up   |
| LMO2664 | 9.634 up   |
| LMO2665 | 14.893 up  |
| LMO2666 | 15.747 up  |
| LMO2667 | 6.649 up   |
| LMO2668 | 7.161 up   |
| LMO2670 | 3.495 up   |
| LMO2671 | 2.377 up   |
| LMO2673 | 2.096 up   |
| LMO2674 | 3.332 up   |



|         |             |
|---------|-------------|
| LMO2681 | 2.798 up    |
| LMO2682 | 3.003 up    |
| LMO2683 | 8.343 up    |
| LMO2684 | 8.427 up    |
| LMO2685 | 11.418 up   |
| LMO2686 | 7.288 down  |
| LMO2687 | 2.941 down  |
| LMO2688 | 3.496 down  |
| LMO2689 | 8.642 down  |
| LMO2690 | 28.488 down |
| LMO2704 | 2.048 down  |
| LMO2707 | 2.863 up    |
| LMO2708 | 20.466 up   |
| LMO2710 | 3.768 down  |
| LMO2713 | 3.577 up    |
| LMO2714 | 2.694 up    |
| LMO2719 | 4.555 down  |
| LMO2720 | 7.407 down  |
| LMO2724 | 2.409 up    |
| LMO2725 | 2.554 down  |
| LMO2726 | 4.515 down  |
| LMO2727 | 2.817 down  |
| LMO2733 | 4.733 up    |
| LMO2734 | 6.192 up    |
| LMO2735 | 6.244 up    |
| LMO2736 | 2.065 up    |
| LMO2737 | 4.242 down  |
| LMO2742 | 9.154 up    |
| LMO2743 | 4.336 up    |
| LMO2744 | 2.520 down  |
| LMO2749 | 4.094 down  |
| LMO2750 | 2.431 down  |
| LMO2753 | 3.822 down  |
| LMO2754 | 3.175 down  |
| LMO2755 | 2.035 down  |
| LMO2756 | 2.604 down  |
| LMO2758 | 4.119 down  |
| LMO2761 | 2.187 down  |
| LMO2766 | 2.290 down  |
| LMO2767 | 2.016 down  |
| LMO2768 | 2.222 down  |
| LMO2769 | 3.718 down  |
| LMO2771 | 2.043 up    |
| LMO2772 | 4.708 up    |
| LMO2777 | 2.956 down  |
| LMO2779 | 5.135 down  |
| LMO2780 | 3.774 up    |
| LMO2781 | 15.760 up   |

|         |            |
|---------|------------|
| LMO2782 | 27.191 up  |
| LMO2783 | 18.995 up  |
| LMO2786 | 2.144 down |
| LMO2787 | 2.245 down |
| LMO2791 | 2.181 down |
| LMO2792 | 2.649 up   |
| LMO2793 | 3.320 down |
| LMO2794 | 2.650 down |
| LMO2799 | 3.864 up   |
| LMO2800 | 3.867 up   |
| LMO2801 | 9.175 up   |
| LMO2810 | 3.472 down |
| LMO2811 | 5.263 down |
| LMO2812 | 4.688 up   |
| LMO2814 | 2.837 down |
| LMO2816 | 15.953 up  |
| LMO2817 | 6.409 up   |
| LMO2818 | 5.167 up   |
| LMO2819 | 2.630 up   |
| LMO2826 | 4.158 down |
| LMO2827 | 4.849 down |
| LMO2828 | 2.028 up   |
| LMO2829 | 3.171 down |
| LMO2842 | 3.384 down |
| LMO2843 | 2.192 down |
| LMO2844 | 2.473 down |
| LMO2845 | 2.566 down |
| LMO2846 | 2.508 up   |
| LMO2847 | 3.324 up   |
| LMO2848 | 7.039 up   |
| LMO2849 | 8.746 up   |
| LMO2850 | 16.839 up  |
| LMO2851 | 11.194 up  |
| LMO2852 | 4.724 down |
| LMO2854 | 2.514 down |
| LMO2855 | 2.612 down |
| LMO2856 | 3.056 down |
| LMO2857 | 7.087 down |
