# Supplementary material for: Changes in Gene Expression during Adaptation of Listeria monocytogenes to the Soil Environment
Source: PubMed Central journal article supplement (PMC3179493; doi:10.1371/journal.pone.0024881), 2011-09-23
Supplement: pone.0024881.s002.pdf [file pone.0024881.s002.pdf]

Table S2. Genes over 2-fold change at time 30 minutes.

| listlist ID | Fold change TA 30 vs T0 |
|-------------|-------------------------|
| LMO0001     | 3.525 down              |
| LMO0002     | 3.393 down              |
| LMO0003     | 7.593 down              |
| LMO0004     | 3.859 down              |
| LMO0005     | 3.191 down              |
| LMO0008     | 2.915 down              |
| LMO0009     | 4.931 down              |
| LMO0010     | 2.802 down              |
| LMO0013     | 2.639 down              |
| LMO0017     | 6.566 down              |
| LMO0020     | 2.149 up                |
| LMO0021     | 12.812 up               |
| LMO0022     | 19.697 up               |
| LMO0023     | 14.374 up               |
| LMO0024     | 25.296 up               |
| LMO0027     | 41.540 up               |
| LMO0028     | 2.508 down              |
| LMO0029     | 5.104 down              |
| LMO0030     | 4.707 down              |
| LMO0031     | 3.188 down              |
| LMO0032     | 2.063 down              |
| LMO0033     | 3.449 down              |
| LMO0034     | 5.131 down              |
| LMO0035     | 3.678 down              |
| LMO0039     | 2.076 up                |
| LMO0040     | 3.777 down              |
| LMO0041     | 3.443 down              |
| LMO0042     | 13.250 down             |
| LMO0046     | 4.639 down              |
| LMO0047     | 2.229 up                |
| LMO0050     | 5.331 down              |
| LMO0051     | 4.445 down              |
| LMO0055     | 6.400 down              |
| LMO0057     | 2.583 down              |
| LMO0058     | 3.141 down              |
| LMO0059     | 2.234 down              |
| LMO0060     | 2.136 down              |
| LMO0066     | 2.200 down              |
| LMO0070     | 3.204 down              |
| LMO0071     | 9.228 down              |
| LMO0072     | 13.701 down             |
| LMO0073     | 7.649 down              |
| LMO0074     | 7.022 down              |
| LMO0075     | 3.989 down              |

|         |             |
|---------|-------------|
| LMO0076 | 2.841 down  |
| LMO0077 | 6.316 down  |
| LMO0079 | 3.806 down  |
| LMO0080 | 2.692 down  |
| LMO0081 | 2.043 down  |
| LMO0086 | 2.319 down  |
| LMO0094 | 2.444 down  |
| LMO0095 | 2.486 down  |
| LMO0099 | 2.751 down  |
| LMO0100 | 2.113 down  |
| LMO0101 | 3.220 down  |
| LMO0102 | 4.007 down  |
| LMO0103 | 3.103 down  |
| LMO0104 | 2.973 down  |
| LMO0105 | 43.506 up   |
| LMO0106 | 7.111 down  |
| LMO0107 | 2.061 down  |
| LMO0108 | 2.559 down  |
| LMO0111 | 10.735 down |
| LMO0112 | 6.948 down  |
| LMO0113 | 2.892 up    |
| LMO0114 | 2.139 up    |
| LMO0119 | 2.224 up    |
| LMO0123 | 2.046 up    |
| LMO0127 | 2.074 up    |
| LMO0128 | 2.131 up    |
| LMO0132 | 3.651 down  |
| LMO0133 | 2.415 up    |
| LMO0134 | 2.746 up    |
| LMO0135 | 2.743 down  |
| LMO0136 | 2.663 down  |
| LMO0137 | 3.062 down  |
| LMO0138 | 4.296 down  |
| LMO0139 | 4.049 down  |
| LMO0140 | 4.131 down  |
| LMO0141 | 2.188 down  |
| LMO0142 | 6.600 down  |
| LMO0143 | 3.817 down  |
| LMO0144 | 6.736 down  |
| LMO0145 | 7.302 down  |
| LMO0146 | 4.388 down  |
| LMO0149 | 2.725 down  |
| LMO0150 | 2.802 down  |
| LMO0151 | 12.152 down |
| LMO0152 | 11.850 down |
| LMO0153 | 20.115 down |
| LMO0154 | 19.330 down |
| LMO0155 | 5.535 down  |

|         |             |
|---------|-------------|
| LMO0156 | 4.009 down  |
| LMO0157 | 2.177 down  |
| LMO0158 | 4.188 down  |
| LMO0159 | 3.994 down  |
| LMO0160 | 4.016 down  |
| LMO0161 | 2.129 down  |
| LMO0162 | 2.728 down  |
| LMO0164 | 2.294 down  |
| LMO0165 | 2.616 down  |
| LMO0166 | 2.816 down  |
| LMO0167 | 3.795 down  |
| LMO0168 | 4.601 down  |
| LMO0175 | 2.097 down  |
| LMO0176 | 6.700 down  |
| LMO0177 | 2.619 down  |
| LMO0181 | 2.426 up    |
| LMO0185 | 9.895 down  |
| LMO0186 | 10.168 down |
| LMO0187 | 6.282 down  |
| LMO0188 | 2.212 down  |
| LMO0189 | 4.872 down  |
| LMO0190 | 7.352 down  |
| LMO0191 | 2.950 down  |
| LMO0192 | 6.369 down  |
| LMO0197 | 2.040 down  |
| LMO0198 | 5.220 down  |
| LMO0199 | 9.179 down  |
| LMO0201 | 3.726 down  |
| LMO0203 | 2.851 down  |
| LMO0207 | 3.509 down  |
| LMO0208 | 2.509 down  |
| LMO0212 | 2.391 down  |
| LMO0213 | 4.993 down  |
| LMO0217 | 2.954 down  |
| LMO0218 | 3.930 down  |
| LMO0219 | 4.062 down  |
| LMO0221 | 3.474 down  |
| LMO0222 | 4.864 down  |
| LMO0223 | 4.454 down  |
| LMO0228 | 2.536 down  |
| LMO0229 | 2.006 up    |
| LMO0234 | 2.416 down  |
| LMO0238 | 5.112 down  |
| LMO0239 | 4.048 down  |
| LMO0240 | 3.294 down  |
| LMO0241 | 5.321 down  |
| LMO0242 | 2.980 down  |
| LMO0243 | 5.776 down  |

|         |             |
|---------|-------------|
| LMO0244 | 14.816 down |
| LMO0245 | 26.173 down |
| LMO0246 | 7.810 down  |
| LMO0247 | 4.104 down  |
| LMO0248 | 2.574 down  |
| LMO0249 | 2.013 down  |
| LMO0251 | 2.348 down  |
| LMO0252 | 11.515 down |
| LMO0253 | 4.717 down  |
| LMO0254 | 2.621 down  |
| LMO0256 | 5.755 down  |
| LMO0262 | 3.872 down  |
| LMO0265 | 2.498 up    |
| LMO0269 | 15.999 down |
| LMO0272 | 5.969 down  |
| LMO0273 | 9.167 down  |
| LMO0276 | 2.295 down  |
| LMO0277 | 3.025 down  |
| LMO0279 | 3.169 up    |
| LMO0281 | 3.213 down  |
| LMO0282 | 11.613 down |
| LMO0283 | 13.149 down |
| LMO0284 | 16.512 down |
| LMO0285 | 18.870 down |
| LMO0286 | 17.356 down |
| LMO0287 | 4.177 down  |
| LMO0288 | 3.860 down  |
| LMO0289 | 3.111 down  |
| LMO0290 | 2.239 down  |
| LMO0291 | 2.470 down  |
| LMO0293 | 8.006 down  |
| LMO0294 | 9.248 down  |
| LMO0295 | 3.524 down  |
| LMO0296 | 6.260 down  |
| LMO0297 | 2.584 up    |
| LMO0298 | 15.822 up   |
| LMO0299 | 17.041 up   |
| LMO0300 | 13.810 up   |
| LMO0301 | 12.663 up   |
| LMO0302 | 5.851 down  |
| LMO0303 | 3.588 down  |
| LMO0304 | 5.619 down  |
| LMO0306 | 4.839 down  |
| LMO0307 | 2.561 down  |
| LMO0312 | 3.072 down  |
| LMO0313 | 4.087 down  |
| LMO0314 | 4.013 down  |
| LMO0315 | 4.760 down  |

|         |             |
|---------|-------------|
| LMO0316 | 3.766 down  |
| LMO0317 | 2.345 down  |
| LMO0319 | 3.403 up    |
| LMO0320 | 5.118 down  |
| LMO0321 | 5.375 down  |
| LMO0322 | 5.685 down  |
| LMO0323 | 2.845 up    |
| LMO0326 | 4.315 down  |
| LMO0327 | 2.847 down  |
| LMO0331 | 2.979 down  |
| LMO0332 | 3.602 down  |
| LMO0333 | 7.408 down  |
| LMO0335 | 2.054 down  |
| LMO0336 | 2.383 down  |
| LMO0337 | 4.957 down  |
| LMO0338 | 5.336 down  |
| LMO0342 | 2.620 up    |
| LMO0343 | 4.285 up    |
| LMO0344 | 6.249 up    |
| LMO0345 | 5.345 up    |
| LMO0346 | 8.345 up    |
| LMO0347 | 5.598 up    |
| LMO0348 | 6.555 up    |
| LMO0349 | 4.710 up    |
| LMO0350 | 3.698 up    |
| LMO0351 | 2.768 up    |
| LMO0354 | 2.836 down  |
| LMO0356 | 2.478 down  |
| LMO0358 | 2.452 up    |
| LMO0360 | 3.620 down  |
| LMO0361 | 3.586 down  |
| LMO0362 | 2.625 down  |
| LMO0364 | 14.476 down |
| LMO0365 | 9.607 down  |
| LMO0366 | 4.056 down  |
| LMO0367 | 3.366 down  |
| LMO0368 | 2.430 down  |
| LMO0370 | 2.291 down  |
| LMO0371 | 13.792 down |
| LMO0372 | 2.239 down  |
| LMO0374 | 2.529 down  |
| LMO0380 | 2.721 down  |
| LMO0381 | 2.767 down  |
| LMO0382 | 4.910 down  |
| LMO0383 | 8.293 up    |
| LMO0384 | 9.531 up    |
| LMO0385 | 5.751 up    |
| LMO0386 | 5.058 up    |

|         |             |
|---------|-------------|
| LMO0387 | 4.386 down  |
| LMO0388 | 3.989 down  |
| LMO0389 | 4.059 down  |
| LMO0390 | 8.836 down  |
| LMO0394 | 29.478 down |
| LMO0395 | 9.357 down  |
| LMO0396 | 4.312 down  |
| LMO0397 | 2.521 down  |
| LMO0398 | 3.361 up    |
| LMO0399 | 3.478 up    |
| LMO0400 | 7.580 up    |
| LMO0401 | 20.009 up   |
| LMO0403 | 6.757 down  |
| LMO0404 | 4.730 down  |
| LMO0409 | 2.673 down  |
| LMO0410 | 3.500 down  |
| LMO0411 | 2.497 down  |
| LMO0412 | 4.913 down  |
| LMO0413 | 2.463 down  |
| LMO0414 | 2.522 down  |
| LMO0416 | 2.710 down  |
| LMO0417 | 2.304 down  |
| LMO0419 | 3.144 down  |
| LMO0420 | 3.359 down  |
| LMO0430 | 12.412 down |
| LMO0435 | 3.837 down  |
| LMO0436 | 8.521 down  |
| LMO0437 | 2.139 down  |
| LMO0438 | 2.503 down  |
| LMO0440 | 7.113 down  |
| LMO0441 | 2.095 down  |
| LMO0442 | 4.153 down  |
| LMO0448 | 3.604 down  |
| LMO0449 | 12.737 down |
| LMO0450 | 6.800 down  |
| LMO0451 | 5.142 down  |
| LMO0452 | 3.710 down  |
| LMO0453 | 4.889 down  |
| LMO0454 | 7.373 down  |
| LMO0455 | 6.697 down  |
| LMO0459 | 3.951 down  |
| LMO0460 | 3.028 down  |
| LMO0465 | 8.293 down  |
| LMO0467 | 2.275 down  |
| LMO0468 | 4.774 down  |
| LMO0469 | 28.258 down |
| LMO0470 | 10.380 down |
| LMO0471 | 2.147 up    |

|         |             |
|---------|-------------|
| LMO0472 | 5.167 down  |
| LMO0473 | 5.133 down  |
| LMO0474 | 5.472 down  |
| LMO0475 | 7.106 down  |
| LMO0476 | 3.888 down  |
| LMO0477 | 17.337 down |
| LMO0478 | 17.348 down |
| LMO0479 | 7.051 down  |
| LMO0480 | 3.323 down  |
| LMO0482 | 6.916 down  |
| LMO0484 | 2.790 down  |
| LMO0485 | 20.141 down |
| LMO0486 | 10.802 down |
| LMO0487 | 3.582 down  |
| LMO0488 | 2.050 down  |
| LMO0489 | 3.127 down  |
| LMO0491 | 2.904 down  |
| LMO0492 | 5.213 down  |
| LMO0493 | 2.774 down  |
| LMO0494 | 4.636 down  |
| LMO0495 | 7.569 down  |
| LMO0497 | 10.180 down |
| LMO0501 | 3.259 up    |
| LMO0502 | 6.171 up    |
| LMO0503 | 4.361 up    |
| LMO0504 | 3.775 up    |
| LMO0505 | 2.785 up    |
| LMO0506 | 2.421 down  |
| LMO0507 | 2.487 up    |
| LMO0509 | 9.177 down  |
| LMO0510 | 8.151 down  |
| LMO0511 | 8.709 down  |
| LMO0512 | 2.374 down  |
| LMO0513 | 4.780 down  |
| LMO0514 | 27.493 down |
| LMO0515 | 2.850 up    |
| LMO0517 | 6.903 up    |
| LMO0518 | 4.462 down  |
| LMO0519 | 10.472 down |
| LMO0520 | 3.913 down  |
| LMO0522 | 5.366 down  |
| LMO0523 | 4.073 down  |
| LMO0525 | 4.221 down  |
| LMO0526 | 2.920 down  |
| LMO0527 | 3.022 down  |
| LMO0532 | 3.507 down  |
| LMO0533 | 3.230 down  |
| LMO0535 | 2.284 down  |

|         |             |
|---------|-------------|
| LMO0536 | 5.857 up    |
| LMO0537 | 2.941 down  |
| LMO0541 | 6.902 down  |
| LMO0544 | 7.390 up    |
| LMO0545 | 5.452 up    |
| LMO0546 | 2.483 up    |
| LMO0547 | 4.427 down  |
| LMO0548 | 3.466 down  |
| LMO0549 | 6.219 down  |
| LMO0550 | 5.083 down  |
| LMO0551 | 3.303 down  |
| LMO0552 | 4.104 down  |
| LMO0557 | 2.128 down  |
| LMO0558 | 2.338 down  |
| LMO0559 | 14.544 down |
| LMO0560 | 3.157 down  |
| LMO0569 | 2.376 down  |
| LMO0570 | 4.355 down  |
| LMO0571 | 4.035 down  |
| LMO0572 | 2.713 down  |
| LMO0573 | 4.658 down  |
| LMO0575 | 2.824 down  |
| LMO0576 | 2.344 down  |
| LMO0577 | 2.390 down  |
| LMO0578 | 2.815 down  |
| LMO0581 | 8.774 down  |
| LMO0582 | 6.776 down  |
| LMO0583 | 3.523 down  |
| LMO0584 | 3.325 up    |
| LMO0585 | 8.303 down  |
| LMO0586 | 10.479 down |
| LMO0587 | 3.888 down  |
| LMO0588 | 9.377 down  |
| LMO0589 | 4.219 down  |
| LMO0590 | 2.498 down  |
| LMO0593 | 2.381 down  |
| LMO0594 | 2.581 down  |
| LMO0595 | 3.127 down  |
| LMO0597 | 9.881 down  |
| LMO0598 | 8.163 down  |
| LMO0599 | 5.619 down  |
| LMO0600 | 4.625 down  |
| LMO0601 | 4.205 down  |
| LMO0603 | 4.351 down  |
| LMO0604 | 7.895 down  |
| LMO0605 | 4.232 down  |
| LMO0606 | 2.065 down  |
| LMO0608 | 2.181 up    |



|         |             |
|---------|-------------|
| LMO0609 | 10.771 down |
| LMO0611 | 13.080 down |
| LMO0614 | 3.022 down  |
| LMO0615 | 4.459 down  |
| LMO0616 | 7.003 down  |
| LMO0617 | 2.135 down  |
| LMO0618 | 4.869 down  |
| LMO0619 | 2.841 down  |
| LMO0620 | 3.046 down  |
| LMO0621 | 3.459 down  |
| LMO0622 | 3.582 down  |
| LMO0623 | 2.015 down  |
| LMO0625 | 2.123 up    |
| LMO0626 | 2.828 down  |
| LMO0627 | 2.335 down  |
| LMO0628 | 2.684 up    |
| LMO0629 | 2.377 up    |
| LMO0630 | 4.485 up    |
| LMO0631 | 2.922 up    |
| LMO0632 | 4.672 up    |
| LMO0633 | 4.049 up    |
| LMO0634 | 3.930 up    |
| LMO0635 | 8.328 down  |
| LMO0636 | 4.745 down  |
| LMO0637 | 4.437 down  |
| LMO0638 | 13.910 down |
| LMO0642 | 4.082 down  |
| LMO0643 | 4.796 up    |
| LMO0644 | 4.630 down  |
| LMO0645 | 6.208 down  |
| LMO0646 | 2.792 down  |
| LMO0648 | 3.174 down  |
| LMO0652 | 2.622 down  |
| LMO0654 | 4.301 down  |
| LMO0655 | 8.055 down  |
| LMO0656 | 24.238 down |
| LMO0657 | 5.238 down  |
| LMO0658 | 4.995 down  |
| LMO0659 | 2.520 down  |
| LMO0662 | 2.115 down  |
| LMO0663 | 2.445 down  |
| LMO0664 | 6.738 down  |
| LMO0665 | 5.657 down  |
| LMO0666 | 5.934 down  |
| LMO0667 | 4.319 down  |
| LMO0668 | 5.774 down  |
| LMO0671 | 3.106 down  |
| LMO0672 | 10.709 down |

|         |             |
|---------|-------------|
| LMO0677 | 2.284 down  |
| LMO0678 | 10.497 down |
| LMO0679 | 13.307 down |
| LMO0680 | 12.536 down |
| LMO0681 | 7.433 down  |
| LMO0682 | 5.960 down  |
| LMO0683 | 23.620 down |
| LMO0684 | 11.504 down |
| LMO0685 | 3.360 down  |
| LMO0686 | 2.073 down  |
| LMO0691 | 5.016 down  |
| LMO0692 | 4.249 down  |
| LMO0693 | 6.426 down  |
| LMO0694 | 4.623 down  |
| LMO0695 | 3.085 down  |
| LMO0696 | 3.822 down  |
| LMO0701 | 2.132 down  |
| LMO0703 | 2.967 down  |
| LMO0704 | 2.559 down  |
| LMO0705 | 2.065 down  |
| LMO0721 | 7.791 down  |
| LMO0725 | 22.143 down |
| LMO0726 | 10.453 down |
| LMO0727 | 6.911 down  |
| LMO0728 | 12.177 down |
| LMO0729 | 2.180 down  |
| LMO0730 | 2.133 down  |
| LMO0731 | 3.192 down  |
| LMO0732 | 2.642 down  |
| LMO0733 | 5.619 down  |
| LMO0734 | 2.925 down  |
| LMO0739 | 4.130 down  |
| LMO0740 | 7.475 down  |
| LMO0742 | 2.779 down  |
| LMO0744 | 2.401 down  |
| LMO0745 | 4.567 down  |
| LMO0748 | 4.735 down  |
| LMO0749 | 3.199 down  |
| LMO0750 | 3.190 down  |
| LMO0751 | 3.255 down  |
| LMO0752 | 3.512 down  |
| LMO0753 | 2.429 down  |
| LMO0755 | 2.180 down  |
| LMO0756 | 2.851 down  |
| LMO0757 | 3.235 down  |
| LMO0763 | 2.713 down  |
| LMO0764 | 3.941 down  |
| LMO0765 | 8.739 down  |

|         |             |
|---------|-------------|
| LMO0766 | 3.357 down  |
| LMO0767 | 3.902 down  |
| LMO0768 | 2.649 down  |
| LMO0769 | 2.989 down  |
| LMO0770 | 6.499 down  |
| LMO0771 | 19.239 down |
| LMO0772 | 13.413 down |
| LMO0773 | 3.463 down  |
| LMO0774 | 2.374 down  |
| LMO0775 | 2.533 down  |
| LMO0776 | 2.952 down  |
| LMO0777 | 9.301 down  |
| LMO0778 | 10.710 down |
| LMO0779 | 7.695 down  |
| LMO0781 | 2.357 up    |
| LMO0785 | 5.601 down  |
| LMO0786 | 2.288 down  |
| LMO0787 | 4.482 down  |
| LMO0788 | 3.816 down  |
| LMO0789 | 4.042 down  |
| LMO0790 | 10.621 down |
| LMO0791 | 7.977 down  |
| LMO0792 | 3.096 down  |
| LMO0793 | 6.677 down  |
| LMO0795 | 6.420 down  |
| LMO0797 | 3.523 down  |
| LMO0798 | 2.669 down  |
| LMO0799 | 2.073 down  |
| LMO0801 | 4.341 down  |
| LMO0802 | 17.176 down |
| LMO0803 | 3.949 down  |
| LMO0804 | 4.739 down  |
| LMO0805 | 3.494 down  |
| LMO0806 | 9.330 down  |
| LMO0807 | 4.463 down  |
| LMO0808 | 2.630 down  |
| LMO0811 | 3.993 down  |
| LMO0812 | 4.479 down  |
| LMO0814 | 6.380 down  |
| LMO0815 | 5.765 down  |
| LMO0816 | 7.277 down  |
| LMO0817 | 13.654 down |
| LMO0818 | 3.481 down  |
| LMO0820 | 2.967 down  |
| LMO0821 | 2.889 down  |
| LMO0824 | 2.492 down  |
| LMO0825 | 2.087 down  |
| LMO0826 | 2.739 down  |

|         |             |
|---------|-------------|
| LMO0831 | 5.756 down  |
| LMO0833 | 6.374 down  |
| LMO0834 | 13.594 down |
| LMO0835 | 8.668 down  |
| LMO0836 | 17.145 down |
| LMO0837 | 11.183 down |
| LMO0838 | 2.177 down  |
| LMO0839 | 4.507 down  |
| LMO0840 | 9.662 down  |
| LMO0841 | 3.246 down  |
| LMO0842 | 10.844 down |
| LMO0843 | 2.320 down  |
| LMO0844 | 5.306 down  |
| LMO0845 | 4.030 down  |
| LMO0846 | 4.779 down  |
| LMO0847 | 9.073 down  |
| LMO0848 | 10.680 down |
| LMO0849 | 2.464 down  |
| LMO0850 | 12.029 down |
| LMO0851 | 9.123 down  |
| LMO0852 | 6.876 down  |
| LMO0853 | 4.626 down  |
| LMO0854 | 5.263 down  |
| LMO0855 | 2.878 down  |
| LMO0856 | 3.085 down  |
| LMO0857 | 5.089 down  |
| LMO0864 | 2.744 down  |
| LMO0866 | 4.901 down  |
| LMO0867 | 8.333 down  |
| LMO0868 | 4.132 down  |
| LMO0869 | 2.975 up    |
| LMO0873 | 3.350 up    |
| LMO0874 | 6.369 up    |
| LMO0875 | 3.987 up    |
| LMO0876 | 3.381 up    |
| LMO0877 | 3.630 up    |
| LMO0878 | 5.696 up    |
| LMO0879 | 3.847 up    |
| LMO0882 | 6.612 down  |
| LMO0883 | 5.096 down  |
| LMO0884 | 3.944 down  |
| LMO0885 | 2.696 down  |
| LMO0886 | 2.160 down  |
| LMO0887 | 4.605 down  |
| LMO0888 | 7.081 down  |
| LMO0889 | 3.379 down  |
| LMO0890 | 3.632 down  |
| LMO0891 | 3.657 down  |

|         |             |
|---------|-------------|
| LMO0892 | 2.319 down  |
| LMO0898 | 2.370 down  |
| LMO0899 | 8.706 down  |
| LMO0900 | 4.446 down  |
| LMO0901 | 3.590 down  |
| LMO0902 | 3.689 down  |
| LMO0903 | 6.355 down  |
| LMO0904 | 2.652 down  |
| LMO0905 | 3.137 down  |
| LMO0908 | 3.923 down  |
| LMO0911 | 2.099 down  |
| LMO0912 | 4.446 down  |
| LMO0914 | 21.601 up   |
| LMO0915 | 25.705 up   |
| LMO0916 | 49.999 up   |
| LMO0917 | 103.336 up  |
| LMO0918 | 7.014 up    |
| LMO0920 | 6.428 down  |
| LMO0921 | 4.673 down  |
| LMO0922 | 5.482 down  |
| LMO0923 | 2.141 down  |
| LMO0924 | 2.129 down  |
| LMO0926 | 2.491 down  |
| LMO0927 | 4.322 down  |
| LMO0928 | 6.154 down  |
| LMO0932 | 2.077 down  |
| LMO0933 | 2.274 down  |
| LMO0934 | 2.902 down  |
| LMO0935 | 3.094 down  |
| LMO0937 | 4.352 down  |
| LMO0938 | 3.477 down  |
| LMO0939 | 10.575 down |
| LMO0942 | 2.215 down  |
| LMO0944 | 2.041 down  |
| LMO0948 | 3.550 down  |
| LMO0949 | 3.012 down  |
| LMO0950 | 3.130 down  |
| LMO0951 | 4.324 down  |
| LMO0952 | 13.482 down |
| LMO0954 | 6.450 up    |
| LMO0955 | 5.585 up    |
| LMO0956 | 2.041 up    |
| LMO0957 | 2.653 up    |
| LMO0959 | 7.703 down  |
| LMO0960 | 2.952 down  |
| LMO0961 | 2.771 down  |
| LMO0965 | 2.178 down  |
| LMO0966 | 4.454 down  |

|         |             |
|---------|-------------|
| LMO0967 | 3.767 down  |
| LMO0968 | 4.252 down  |
| LMO0969 | 3.382 down  |
| LMO0970 | 4.528 down  |
| LMO0971 | 2.748 down  |
| LMO0972 | 2.981 down  |
| LMO0973 | 3.795 down  |
| LMO0974 | 3.460 down  |
| LMO0975 | 4.200 down  |
| LMO0976 | 2.570 down  |
| LMO0978 | 2.889 down  |
| LMO0981 | 2.843 down  |
| LMO0984 | 19.097 up   |
| LMO0985 | 13.917 up   |
| LMO0986 | 13.445 up   |
| LMO0987 | 2.644 up    |
| LMO0988 | 3.703 down  |
| LMO0989 | 2.476 down  |
| LMO0990 | 2.930 down  |
| LMO0995 | 5.050 down  |
| LMO0997 | 5.672 up    |
| LMO0998 | 39.280 down |
| LMO0999 | 9.405 down  |
| LMO1000 | 6.617 down  |
| LMO1001 | 11.536 down |
| LMO1004 | 8.884 down  |
| LMO1005 | 2.958 down  |
| LMO1006 | 4.978 down  |
| LMO1008 | 8.857 down  |
| LMO1009 | 4.832 down  |
| LMO1010 | 2.912 down  |
| LMO1011 | 4.556 down  |
| LMO1012 | 3.724 down  |
| LMO1013 | 5.193 down  |
| LMO1014 | 7.069 down  |
| LMO1015 | 4.972 down  |
| LMO1016 | 4.867 down  |
| LMO1017 | 7.283 down  |
| LMO1024 | 7.343 down  |
| LMO1025 | 7.350 down  |
| LMO1026 | 3.631 down  |
| LMO1027 | 2.721 down  |
| LMO1028 | 3.751 down  |
| LMO1030 | 10.841 down |
| LMO1033 | 2.043 down  |
| LMO1037 | 7.708 down  |
| LMO1038 | 2.862 down  |
| LMO1039 | 2.965 down  |

|         |             |
|---------|-------------|
| LMO1040 | 2.859 down  |
| LMO1041 | 2.466 down  |
| LMO1043 | 2.202 up    |
| LMO1044 | 2.071 up    |
| LMO1045 | 2.269 up    |
| LMO1046 | 3.115 up    |
| LMO1047 | 2.300 up    |
| LMO1048 | 2.167 up    |
| LMO1050 | 2.821 down  |
| LMO1056 | 6.295 down  |
| LMO1060 | 4.162 down  |
| LMO1061 | 3.266 down  |
| LMO1063 | 2.177 down  |
| LMO1064 | 7.592 down  |
| LMO1065 | 4.957 down  |
| LMO1066 | 4.673 down  |
| LMO1067 | 9.347 down  |
| LMO1068 | 2.939 up    |
| LMO1069 | 4.513 down  |
| LMO1070 | 4.727 down  |
| LMO1071 | 9.044 down  |
| LMO1072 | 2.600 down  |
| LMO1073 | 12.311 down |
| LMO1074 | 8.804 down  |
| LMO1075 | 4.113 down  |
| LMO1076 | 5.003 down  |
| LMO1077 | 8.226 down  |
| LMO1078 | 16.484 down |
| LMO1079 | 10.173 down |
| LMO1080 | 4.039 down  |
| LMO1081 | 2.044 down  |
| LMO1082 | 2.239 down  |
| LMO1085 | 4.208 down  |
| LMO1086 | 4.581 down  |
| LMO1087 | 2.986 down  |
| LMO1088 | 4.723 down  |
| LMO1089 | 5.129 down  |
| LMO1090 | 5.196 down  |
| LMO1091 | 4.570 down  |
| LMO1092 | 3.029 down  |
| LMO1093 | 2.423 down  |
| LMO1096 | 4.132 down  |
| LMO1100 | 2.685 down  |
| LMO1102 | 2.418 down  |
| LMO1113 | 2.096 up    |
| LMO1114 | 2.070 up    |
| LMO1116 | 3.021 down  |
| LMO1117 | 4.111 down  |

|         |            |
|---------|------------|
| LMO1118 | 8.544 down |
| LMO1119 | 9.804 down |
| LMO1120 | 9.740 down |
| LMO1121 | 3.234 down |
| LMO1122 | 5.159 down |
| LMO1123 | 6.601 down |
| LMO1124 | 4.058 down |
| LMO1125 | 2.757 down |
| LMO1126 | 2.894 down |
| LMO1127 | 4.128 down |
| LMO1128 | 5.599 down |
| LMO1129 | 4.215 down |
| LMO1130 | 6.079 down |
| LMO1131 | 6.517 down |
| LMO1132 | 3.461 down |
| LMO1134 | 7.480 down |
| LMO1135 | 7.990 down |
| LMO1136 | 8.920 down |
| LMO1137 | 2.578 up   |
| LMO1140 | 2.322 up   |
| LMO1141 | 7.581 down |
| LMO1144 | 3.832 down |
| LMO1145 | 3.660 down |
| LMO1146 | 3.376 down |
| LMO1147 | 4.381 down |
| LMO1148 | 4.553 down |
| LMO1149 | 7.577 down |
| LMO1150 | 2.085 down |
| LMO1169 | 4.561 down |
| LMO1170 | 5.479 down |
| LMO1172 | 2.922 down |
| LMO1175 | 4.199 down |
| LMO1176 | 2.597 down |
| LMO1177 | 2.819 down |
| LMO1178 | 2.530 down |
| LMO1179 | 2.967 down |
| LMO1180 | 3.865 down |
| LMO1181 | 5.754 down |
| LMO1182 | 4.047 down |
| LMO1183 | 5.244 down |
| LMO1184 | 3.747 down |
| LMO1185 | 4.901 down |
| LMO1186 | 4.025 down |
| LMO1188 | 4.688 down |
| LMO1190 | 3.535 down |
| LMO1191 | 2.370 down |
| LMO1193 | 2.296 down |
| LMO1194 | 2.264 down |



|         |             |
|---------|-------------|
| LMO1199 | 2.565 down  |
| LMO1200 | 2.837 down  |
| LMO1201 | 5.110 down  |
| LMO1202 | 5.355 down  |
| LMO1203 | 4.244 down  |
| LMO1204 | 4.241 down  |
| LMO1205 | 3.807 down  |
| LMO1206 | 3.449 down  |
| LMO1207 | 3.682 down  |
| LMO1208 | 4.429 down  |
| LMO1209 | 2.435 down  |
| LMO1210 | 11.844 down |
| LMO1211 | 10.100 down |
| LMO1212 | 2.222 down  |
| LMO1213 | 4.194 down  |
| LMO1214 | 4.406 down  |
| LMO1215 | 2.151 down  |
| LMO1216 | 3.713 down  |
| LMO1219 | 2.108 down  |
| LMO1220 | 2.069 down  |
| LMO1221 | 3.208 down  |
| LMO1222 | 2.852 down  |
| LMO1223 | 11.244 down |
| LMO1224 | 3.388 down  |
| LMO1225 | 5.808 down  |
| LMO1227 | 2.461 down  |
| LMO1228 | 5.209 down  |
| LMO1229 | 7.453 down  |
| LMO1230 | 5.275 down  |
| LMO1231 | 2.746 down  |
| LMO1232 | 2.818 down  |
| LMO1235 | 7.577 down  |
| LMO1236 | 10.095 down |
| LMO1237 | 16.010 down |
| LMO1238 | 8.515 down  |
| LMO1239 | 15.873 down |
| LMO1240 | 9.622 down  |
| LMO1241 | 2.147 up    |
| LMO1242 | 3.015 down  |
| LMO1243 | 3.594 down  |
| LMO1244 | 2.008 down  |
| LMO1245 | 6.260 down  |
| LMO1246 | 7.166 down  |
| LMO1247 | 11.565 down |
| LMO1248 | 31.331 down |
| LMO1249 | 12.146 down |
| LMO1250 | 4.324 down  |
| LMO1251 | 31.537 down |

|         |             |
|---------|-------------|
| LMO1252 | 7.784 down  |
| LMO1253 | 5.668 down  |
| LMO1257 | 2.028 down  |
| LMO1259 | 2.140 down  |
| LMO1260 | 4.758 down  |
| LMO1262 | 3.694 down  |
| LMO1263 | 2.023 down  |
| LMO1266 | 5.815 down  |
| LMO1267 | 2.615 down  |
| LMO1268 | 2.918 down  |
| LMO1269 | 2.384 down  |
| LMO1270 | 2.603 down  |
| LMO1271 | 3.543 down  |
| LMO1272 | 3.175 down  |
| LMO1273 | 3.737 down  |
| LMO1274 | 3.351 down  |
| LMO1275 | 11.284 down |
| LMO1276 | 5.246 down  |
| LMO1280 | 2.390 down  |
| LMO1282 | 2.407 down  |
| LMO1283 | 2.465 down  |
| LMO1284 | 7.146 down  |
| LMO1285 | 3.602 down  |
| LMO1286 | 3.781 down  |
| LMO1287 | 2.050 down  |
| LMO1288 | 2.191 down  |
| LMO1291 | 4.413 down  |
| LMO1292 | 12.758 down |
| LMO1293 | 2.850 up    |
| LMO1294 | 6.565 down  |
| LMO1295 | 5.854 down  |
| LMO1296 | 6.448 down  |
| LMO1297 | 5.424 down  |
| LMO1298 | 21.531 down |
| LMO1299 | 2.095 down  |
| LMO1300 | 8.938 down  |
| LMO1305 | 2.671 down  |
| LMO1306 | 7.733 down  |
| LMO1307 | 14.260 down |
| LMO1308 | 5.605 down  |
| LMO1309 | 6.806 down  |
| LMO1310 | 17.213 down |
| LMO1311 | 18.795 down |
| LMO1312 | 13.107 down |
| LMO1313 | 5.040 down  |
| LMO1314 | 4.313 down  |
| LMO1315 | 7.156 down  |
| LMO1316 | 7.050 down  |

|         |             |
|---------|-------------|
| LMO1317 | 3.747 down  |
| LMO1318 | 2.334 down  |
| LMO1319 | 2.448 down  |
| LMO1321 | 2.923 down  |
| LMO1322 | 2.918 down  |
| LMO1323 | 2.338 down  |
| LMO1326 | 3.385 down  |
| LMO1327 | 6.042 down  |
| LMO1328 | 7.646 down  |
| LMO1329 | 4.404 down  |
| LMO1330 | 7.381 down  |
| LMO1331 | 12.179 down |
| LMO1333 | 5.300 down  |
| LMO1334 | 3.697 down  |
| LMO1335 | 7.231 down  |
| LMO1336 | 3.984 down  |
| LMO1337 | 4.049 down  |
| LMO1338 | 2.943 down  |
| LMO1339 | 3.282 down  |
| LMO1341 | 2.689 down  |
| LMO1347 | 4.999 down  |
| LMO1348 | 2.629 up    |
| LMO1349 | 9.321 up    |
| LMO1350 | 4.750 up    |
| LMO1351 | 5.355 down  |
| LMO1352 | 4.859 down  |
| LMO1353 | 21.983 down |
| LMO1354 | 2.241 down  |
| LMO1355 | 3.528 down  |
| LMO1356 | 5.517 down  |
| LMO1357 | 3.185 down  |
| LMO1358 | 2.904 down  |
| LMO1359 | 4.409 down  |
| LMO1360 | 3.042 down  |
| LMO1361 | 2.119 down  |
| LMO1362 | 2.308 down  |
| LMO1363 | 2.357 down  |
| LMO1364 | 4.838 down  |
| LMO1365 | 6.775 down  |
| LMO1366 | 5.309 down  |
| LMO1368 | 2.531 down  |
| LMO1369 | 9.032 down  |
| LMO1370 | 9.082 down  |
| LMO1371 | 2.744 down  |
| LMO1375 | 3.764 down  |
| LMO1376 | 2.435 down  |
| LMO1377 | 2.560 down  |
| LMO1378 | 2.812 down  |

|         |             |
|---------|-------------|
| LMO1384 | 10.912 down |
| LMO1385 | 5.866 down  |
| LMO1387 | 2.816 down  |
| LMO1392 | 3.865 down  |
| LMO1393 | 2.052 down  |
| LMO1394 | 2.969 down  |
| LMO1395 | 18.656 down |
| LMO1396 | 14.311 down |
| LMO1397 | 2.459 down  |
| LMO1398 | 2.438 down  |
| LMO1399 | 2.334 down  |
| LMO1400 | 5.048 down  |
| LMO1401 | 5.307 down  |
| LMO1402 | 4.198 down  |
| LMO1403 | 3.112 down  |
| LMO1406 | 2.182 down  |
| LMO1407 | 2.063 down  |
| LMO1408 | 2.629 down  |
| LMO1409 | 10.580 down |
| LMO1410 | 7.698 down  |
| LMO1411 | 5.543 down  |
| LMO1412 | 4.439 down  |
| LMO1414 | 3.739 down  |
| LMO1415 | 2.962 down  |
| LMO1416 | 13.797 down |
| LMO1417 | 20.865 down |
| LMO1418 | 12.578 down |
| LMO1419 | 15.115 down |
| LMO1420 | 11.929 down |
| LMO1421 | 2.603 down  |
| LMO1424 | 3.639 down  |
| LMO1427 | 2.147 down  |
| LMO1428 | 9.492 down  |
| LMO1429 | 37.743 down |
| LMO1430 | 6.910 down  |
| LMO1431 | 15.737 down |
| LMO1436 | 3.700 down  |
| LMO1437 | 6.454 down  |
| LMO1438 | 2.908 down  |
| LMO1440 | 38.745 down |
| LMO1441 | 4.680 down  |
| LMO1442 | 5.376 down  |
| LMO1443 | 8.008 down  |
| LMO1444 | 2.166 down  |
| LMO1445 | 15.151 down |
| LMO1446 | 18.618 down |
| LMO1447 | 13.432 down |
| LMO1448 | 2.518 down  |

|         |             |
|---------|-------------|
| LMO1449 | 4.310 down  |
| LMO1450 | 4.462 down  |
| LMO1451 | 2.993 down  |
| LMO1453 | 3.552 down  |
| LMO1457 | 2.473 down  |
| LMO1458 | 2.567 down  |
| LMO1459 | 2.779 down  |
| LMO1461 | 2.385 down  |
| LMO1462 | 3.243 down  |
| LMO1463 | 4.083 down  |
| LMO1464 | 5.192 down  |
| LMO1465 | 3.121 down  |
| LMO1466 | 3.048 down  |
| LMO1467 | 3.166 down  |
| LMO1468 | 4.430 down  |
| LMO1469 | 2.628 down  |
| LMO1476 | 5.053 down  |
| LMO1478 | 2.976 down  |
| LMO1479 | 4.485 down  |
| LMO1480 | 7.628 down  |
| LMO1481 | 4.036 down  |
| LMO1482 | 2.684 down  |
| LMO1483 | 7.485 down  |
| LMO1484 | 2.709 down  |
| LMO1485 | 20.037 down |
| LMO1486 | 6.991 down  |
| LMO1487 | 4.819 down  |
| LMO1488 | 4.162 down  |
| LMO1489 | 4.118 down  |
| LMO1490 | 4.651 down  |
| LMO1491 | 5.743 down  |
| LMO1492 | 14.545 down |
| LMO1494 | 5.233 down  |
| LMO1495 | 3.522 down  |
| LMO1496 | 6.567 down  |
| LMO1497 | 4.318 down  |
| LMO1498 | 8.164 down  |
| LMO1499 | 9.171 down  |
| LMO1500 | 6.339 down  |
| LMO1504 | 3.462 down  |
| LMO1505 | 2.471 down  |
| LMO1506 | 5.211 down  |
| LMO1507 | 2.303 down  |
| LMO1509 | 2.105 down  |
| LMO1510 | 2.833 down  |
| LMO1511 | 3.682 down  |
| LMO1512 | 4.095 down  |
| LMO1513 | 4.575 down  |

|         |             |
|---------|-------------|
| LMO1514 | 2.112 down  |
| LMO1515 | 21.982 down |
| LMO1516 | 2.980 down  |
| LMO1517 | 3.125 down  |
| LMO1518 | 6.621 down  |
| LMO1519 | 3.575 down  |
| LMO1520 | 4.063 down  |
| LMO1521 | 5.069 down  |
| LMO1522 | 6.238 down  |
| LMO1523 | 3.883 down  |
| LMO1524 | 6.199 down  |
| LMO1525 | 2.474 down  |
| LMO1528 | 4.402 down  |
| LMO1529 | 3.194 down  |
| LMO1530 | 4.297 down  |
| LMO1531 | 2.631 down  |
| LMO1532 | 2.683 down  |
| LMO1533 | 2.342 down  |
| LMO1534 | 2.411 down  |
| LMO1535 | 2.297 down  |
| LMO1536 | 6.391 down  |
| LMO1537 | 6.460 down  |
| LMO1538 | 3.258 up    |
| LMO1540 | 2.918 down  |
| LMO1543 | 2.895 down  |
| LMO1544 | 3.887 down  |
| LMO1545 | 6.947 down  |
| LMO1546 | 5.764 down  |
| LMO1547 | 3.379 down  |
| LMO1548 | 3.205 down  |
| LMO1549 | 9.079 down  |
| LMO1550 | 3.613 down  |
| LMO1551 | 6.060 down  |
| LMO1552 | 3.253 down  |
| LMO1554 | 2.398 down  |
| LMO1555 | 6.197 down  |
| LMO1556 | 6.863 down  |
| LMO1557 | 8.315 down  |
| LMO1558 | 16.634 down |
| LMO1559 | 3.150 down  |
| LMO1560 | 2.119 down  |
| LMO1565 | 2.401 down  |
| LMO1566 | 2.180 down  |
| LMO1568 | 5.657 down  |
| LMO1569 | 4.704 down  |
| LMO1571 | 2.686 down  |
| LMO1572 | 2.843 down  |
| LMO1573 | 2.291 down  |

|         |             |
|---------|-------------|
| LMO1574 | 3.327 down  |
| LMO1575 | 3.118 down  |
| LMO1576 | 3.248 down  |
| LMO1577 | 3.149 down  |
| LMO1580 | 2.612 up    |
| LMO1581 | 2.987 down  |
| LMO1582 | 3.908 down  |
| LMO1583 | 3.148 down  |
| LMO1584 | 7.020 down  |
| LMO1585 | 10.777 down |
| LMO1587 | 2.258 up    |
| LMO1588 | 3.658 up    |
| LMO1589 | 4.836 up    |
| LMO1590 | 7.591 up    |
| LMO1591 | 4.334 up    |
| LMO1592 | 3.810 down  |
| LMO1593 | 3.381 down  |
| LMO1594 | 4.263 down  |
| LMO1595 | 3.037 down  |
| LMO1596 | 3.528 down  |
| LMO1598 | 2.834 down  |
| LMO1599 | 2.463 down  |
| LMO1600 | 5.691 down  |
| LMO1603 | 4.369 down  |
| LMO1604 | 6.898 down  |
| LMO1606 | 2.595 down  |
| LMO1613 | 3.810 down  |
| LMO1614 | 12.710 down |
| LMO1615 | 10.204 down |
| LMO1616 | 11.631 down |
| LMO1617 | 5.451 down  |
| LMO1618 | 8.097 down  |
| LMO1621 | 2.639 down  |
| LMO1622 | 5.877 down  |
| LMO1623 | 8.784 down  |
| LMO1624 | 4.973 down  |
| LMO1625 | 8.249 down  |
| LMO1626 | 6.647 down  |
| LMO1627 | 2.199 down  |
| LMO1635 | 13.653 down |
| LMO1636 | 2.843 down  |
| LMO1639 | 4.130 down  |
| LMO1640 | 4.545 down  |
| LMO1641 | 3.348 down  |
| LMO1642 | 2.977 down  |
| LMO1643 | 2.457 down  |
| LMO1644 | 2.109 down  |
| LMO1645 | 4.249 down  |

|         |             |
|---------|-------------|
| LMO1646 | 8.279 down  |
| LMO1647 | 11.142 down |
| LMO1648 | 7.935 down  |
| LMO1653 | 6.102 down  |
| LMO1654 | 7.406 down  |
| LMO1655 | 4.221 down  |
| LMO1656 | 10.562 down |
| LMO1657 | 3.245 down  |
| LMO1658 | 2.386 down  |
| LMO1659 | 2.783 down  |
| LMO1660 | 4.221 down  |
| LMO1661 | 2.520 down  |
| LMO1662 | 4.363 down  |
| LMO1663 | 5.549 down  |
| LMO1664 | 9.570 down  |
| LMO1665 | 15.417 down |
| LMO1667 | 2.901 down  |
| LMO1668 | 3.654 down  |
| LMO1669 | 9.027 down  |
| LMO1670 | 15.116 down |
| LMO1671 | 11.570 down |
| LMO1672 | 2.001 down  |
| LMO1673 | 2.427 down  |
| LMO1675 | 2.463 down  |
| LMO1676 | 4.099 down  |
| LMO1677 | 6.983 down  |
| LMO1678 | 2.463 down  |
| LMO1680 | 2.748 down  |
| LMO1681 | 3.446 down  |
| LMO1682 | 6.289 down  |
| LMO1685 | 2.317 down  |
| LMO1686 | 4.137 down  |
| LMO1687 | 6.146 down  |
| LMO1688 | 4.931 down  |
| LMO1689 | 11.745 down |
| LMO1691 | 4.031 down  |
| LMO1692 | 5.602 down  |
| LMO1693 | 3.267 down  |
| LMO1695 | 3.214 down  |
| LMO1696 | 22.171 down |
| LMO1697 | 4.600 down  |
| LMO1698 | 8.723 down  |
| LMO1699 | 3.135 down  |
| LMO1700 | 4.540 down  |
| LMO1701 | 2.216 down  |
| LMO1702 | 2.075 down  |
| LMO1705 | 2.122 down  |
| LMO1706 | 3.712 down  |



|         |             |
|---------|-------------|
| LMO1707 | 5.068 down  |
| LMO1708 | 3.817 down  |
| LMO1709 | 3.818 down  |
| LMO1710 | 8.692 down  |
| LMO1711 | 2.974 down  |
| LMO1712 | 2.128 down  |
| LMO1713 | 5.661 down  |
| LMO1714 | 2.256 down  |
| LMO1715 | 4.254 down  |
| LMO1716 | 2.895 down  |
| LMO1717 | 3.763 down  |
| LMO1718 | 4.214 up    |
| LMO1719 | 4.219 up    |
| LMO1720 | 3.472 up    |
| LMO1721 | 3.346 down  |
| LMO1722 | 6.664 down  |
| LMO1723 | 7.139 down  |
| LMO1724 | 8.584 down  |
| LMO1725 | 8.656 down  |
| LMO1728 | 2.358 up    |
| LMO1729 | 2.971 up    |
| LMO1730 | 12.135 up   |
| LMO1731 | 6.124 up    |
| LMO1732 | 4.314 up    |
| LMO1734 | 2.095 down  |
| LMO1735 | 6.345 down  |
| LMO1736 | 5.902 down  |
| LMO1737 | 5.415 down  |
| LMO1738 | 22.157 down |
| LMO1739 | 19.969 down |
| LMO1740 | 23.491 down |
| LMO1742 | 3.467 down  |
| LMO1743 | 4.083 down  |
| LMO1744 | 6.070 down  |
| LMO1745 | 2.933 down  |
| LMO1746 | 3.108 down  |
| LMO1748 | 19.872 down |
| LMO1749 | 17.608 down |
| LMO1750 | 7.091 down  |
| LMO1751 | 2.335 down  |
| LMO1752 | 2.306 down  |
| LMO1753 | 5.634 down  |
| LMO1755 | 2.020 down  |
| LMO1756 | 2.093 down  |
| LMO1759 | 2.023 down  |
| LMO1760 | 3.957 down  |
| LMO1761 | 9.954 down  |
| LMO1762 | 9.027 down  |

|         |             |
|---------|-------------|
| LMO1763 | 4.203 down  |
| LMO1764 | 2.274 up    |
| LMO1770 | 2.322 down  |
| LMO1775 | 4.224 down  |
| LMO1776 | 11.745 down |
| LMO1777 | 4.600 down  |
| LMO1778 | 6.631 down  |
| LMO1779 | 22.031 down |
| LMO1781 | 2.941 down  |
| LMO1783 | 3.073 down  |
| LMO1784 | 2.132 down  |
| LMO1787 | 4.541 down  |
| LMO1791 | 2.536 up    |
| LMO1796 | 4.165 down  |
| LMO1797 | 3.752 down  |
| LMO1800 | 2.550 down  |
| LMO1801 | 2.465 down  |
| LMO1802 | 4.411 down  |
| LMO1803 | 2.770 down  |
| LMO1804 | 8.247 down  |
| LMO1805 | 9.709 down  |
| LMO1806 | 3.573 down  |
| LMO1807 | 3.526 down  |
| LMO1808 | 3.064 down  |
| LMO1809 | 12.013 down |
| LMO1810 | 12.924 down |
| LMO1811 | 5.570 down  |
| LMO1812 | 5.601 down  |
| LMO1813 | 3.894 down  |
| LMO1814 | 3.443 down  |
| LMO1815 | 8.195 down  |
| LMO1816 | 15.166 down |
| LMO1817 | 4.949 down  |
| LMO1818 | 2.186 down  |
| LMO1825 | 2.496 down  |
| LMO1826 | 5.561 down  |
| LMO1827 | 4.516 down  |
| LMO1828 | 4.432 down  |
| LMO1829 | 3.097 down  |
| LMO1831 | 2.226 up    |
| LMO1837 | 2.444 down  |
| LMO1838 | 3.108 down  |
| LMO1839 | 3.396 down  |
| LMO1840 | 9.346 down  |
| LMO1841 | 20.478 down |
| LMO1842 | 7.893 down  |
| LMO1843 | 2.468 down  |
| LMO1844 | 4.470 down  |

|         |             |
|---------|-------------|
| LMO1845 | 2.008 down  |
| LMO1847 | 2.910 down  |
| LMO1848 | 3.861 down  |
| LMO1849 | 3.436 down  |
| LMO1850 | 4.968 down  |
| LMO1851 | 3.840 down  |
| LMO1854 | 2.901 down  |
| LMO1864 | 16.639 down |
| LMO1865 | 12.083 down |
| LMO1866 | 5.878 down  |
| LMO1868 | 2.091 down  |
| LMO1869 | 5.842 down  |
| LMO1870 | 49.645 down |
| LMO1871 | 6.753 down  |
| LMO1872 | 6.960 down  |
| LMO1873 | 3.235 down  |
| LMO1874 | 2.733 down  |
| LMO1875 | 4.136 down  |
| LMO1878 | 9.619 down  |
| LMO1880 | 7.823 down  |
| LMO1881 | 3.835 down  |
| LMO1882 | 2.956 down  |
| LMO1883 | 6.114 up    |
| LMO1884 | 5.185 down  |
| LMO1885 | 6.991 down  |
| LMO1886 | 3.293 down  |
| LMO1887 | 3.476 down  |
| LMO1889 | 5.668 down  |
| LMO1890 | 6.069 down  |
| LMO1891 | 6.513 down  |
| LMO1892 | 4.218 down  |
| LMO1893 | 2.209 down  |
| LMO1899 | 2.003 down  |
| LMO1900 | 3.354 down  |
| LMO1901 | 2.448 down  |
| LMO1902 | 4.919 down  |
| LMO1903 | 20.373 down |
| LMO1904 | 2.364 down  |
| LMO1905 | 2.848 down  |
| LMO1906 | 2.534 down  |
| LMO1907 | 2.923 down  |
| LMO1908 | 3.984 down  |
| LMO1909 | 5.257 down  |
| LMO1910 | 6.180 down  |
| LMO1911 | 44.636 down |
| LMO1915 | 6.132 down  |
| LMO1916 | 2.919 down  |
| LMO1918 | 7.093 down  |

|         |             |
|---------|-------------|
| LMO1919 | 5.457 down  |
| LMO1920 | 5.008 down  |
| LMO1921 | 2.954 down  |
| LMO1923 | 3.063 down  |
| LMO1924 | 2.338 down  |
| LMO1925 | 6.769 down  |
| LMO1926 | 5.654 down  |
| LMO1927 | 3.943 down  |
| LMO1928 | 4.055 down  |
| LMO1929 | 2.375 down  |
| LMO1930 | 2.822 down  |
| LMO1931 | 2.693 down  |
| LMO1932 | 6.027 down  |
| LMO1933 | 6.817 down  |
| LMO1934 | 2.163 down  |
| LMO1935 | 2.522 down  |
| LMO1936 | 4.348 down  |
| LMO1937 | 8.082 down  |
| LMO1939 | 3.135 down  |
| LMO1940 | 4.364 down  |
| LMO1941 | 2.107 down  |
| LMO1944 | 9.166 down  |
| LMO1946 | 4.491 down  |
| LMO1947 | 3.251 down  |
| LMO1948 | 3.033 down  |
| LMO1949 | 3.132 down  |
| LMO1950 | 3.624 down  |
| LMO1951 | 3.759 down  |
| LMO1952 | 3.869 down  |
| LMO1956 | 5.017 down  |
| LMO1957 | 9.501 down  |
| LMO1958 | 9.462 down  |
| LMO1959 | 8.174 down  |
| LMO1960 | 4.664 down  |
| LMO1961 | 3.202 down  |
| LMO1965 | 3.759 down  |
| LMO1966 | 4.594 up    |
| LMO1967 | 3.799 up    |
| LMO1971 | 2.266 down  |
| LMO1976 | 3.902 down  |
| LMO1977 | 10.951 down |
| LMO1978 | 6.659 down  |
| LMO1979 | 5.810 down  |
| LMO1980 | 5.336 down  |
| LMO1981 | 7.534 down  |
| LMO1982 | 8.939 down  |
| LMO1984 | 3.381 up    |
| LMO1985 | 3.287 up    |

|         |             |
|---------|-------------|
| LMO1986 | 3.737 up    |
| LMO1987 | 3.654 up    |
| LMO1988 | 2.954 up    |
| LMO1989 | 2.889 up    |
| LMO1990 | 2.656 up    |
| LMO1991 | 2.947 up    |
| LMO1994 | 3.328 down  |
| LMO1996 | 2.735 down  |
| LMO1997 | 6.082 up    |
| LMO1998 | 6.294 up    |
| LMO1999 | 10.879 up   |
| LMO2000 | 13.563 up   |
| LMO2001 | 7.748 up    |
| LMO2002 | 7.982 up    |
| LMO2003 | 2.620 up    |
| LMO2004 | 2.165 up    |
| LMO2009 | 3.261 down  |
| LMO2010 | 3.578 down  |
| LMO2011 | 5.375 down  |
| LMO2012 | 4.581 down  |
| LMO2015 | 2.611 down  |
| LMO2016 | 2.181 down  |
| LMO2017 | 2.105 down  |
| LMO2018 | 3.352 down  |
| LMO2019 | 2.693 down  |
| LMO2020 | 5.624 down  |
| LMO2021 | 9.202 down  |
| LMO2022 | 2.556 down  |
| LMO2023 | 5.786 down  |
| LMO2028 | 2.375 down  |
| LMO2029 | 5.300 down  |
| LMO2030 | 2.961 down  |
| LMO2031 | 2.753 down  |
| LMO2033 | 2.992 down  |
| LMO2034 | 5.044 down  |
| LMO2035 | 4.352 down  |
| LMO2036 | 2.518 down  |
| LMO2037 | 3.590 down  |
| LMO2038 | 5.402 down  |
| LMO2039 | 3.620 down  |
| LMO2040 | 8.151 down  |
| LMO2041 | 13.437 down |
| LMO2042 | 22.966 down |
| LMO2044 | 7.555 down  |
| LMO2045 | 21.067 down |
| LMO2046 | 18.552 down |
| LMO2047 | 5.099 down  |
| LMO2048 | 11.684 down |

|         |             |
|---------|-------------|
| LMO2049 | 2.809 down  |
| LMO2050 | 2.975 up    |
| LMO2051 | 3.752 down  |
| LMO2052 | 9.676 down  |
| LMO2053 | 10.209 down |
| LMO2054 | 3.465 down  |
| LMO2055 | 2.990 down  |
| LMO2056 | 5.239 down  |
| LMO2057 | 3.546 down  |
| LMO2058 | 7.185 down  |
| LMO2059 | 6.698 down  |
| LMO2060 | 4.830 down  |
| LMO2061 | 7.823 down  |
| LMO2062 | 18.586 down |
| LMO2063 | 8.257 down  |
| LMO2064 | 3.342 down  |
| LMO2070 | 5.782 down  |
| LMO2071 | 4.021 down  |
| LMO2072 | 4.706 down  |
| LMO2073 | 4.802 down  |
| LMO2074 | 4.134 down  |
| LMO2075 | 3.040 down  |
| LMO2076 | 3.438 down  |
| LMO2077 | 4.028 down  |
| LMO2078 | 6.018 down  |
| LMO2079 | 7.673 down  |
| LMO2080 | 6.805 down  |
| LMO2081 | 4.529 down  |
| LMO2082 | 4.484 down  |
| LMO2086 | 9.196 down  |
| LMO2087 | 2.865 down  |
| LMO2090 | 4.368 up    |
| LMO2091 | 5.981 up    |
| LMO2092 | 2.928 down  |
| LMO2094 | 3.125 down  |
| LMO2095 | 3.218 down  |
| LMO2096 | 4.592 down  |
| LMO2100 | 12.746 down |
| LMO2103 | 3.210 down  |
| LMO2104 | 11.771 down |
| LMO2105 | 14.593 down |
| LMO2106 | 9.373 down  |
| LMO2107 | 2.803 down  |
| LMO2108 | 2.085 down  |
| LMO2109 | 3.013 down  |
| LMO2110 | 2.525 down  |
| LMO2111 | 4.316 down  |
| LMO2112 | 3.366 down  |

|         |             |
|---------|-------------|
| LMO2113 | 2.251 down  |
| LMO2114 | 5.570 down  |
| LMO2115 | 6.676 down  |
| LMO2116 | 6.097 down  |
| LMO2117 | 5.368 down  |
| LMO2118 | 8.375 down  |
| LMO2121 | 23.635 up   |
| LMO2122 | 17.860 up   |
| LMO2123 | 17.192 up   |
| LMO2124 | 6.687 up    |
| LMO2125 | 14.136 up   |
| LMO2127 | 8.309 down  |
| LMO2128 | 7.858 down  |
| LMO2129 | 9.538 down  |
| LMO2130 | 2.921 down  |
| LMO2131 | 6.739 down  |
| LMO2133 | 3.051 down  |
| LMO2134 | 2.224 up    |
| LMO2135 | 3.002 up    |
| LMO2136 | 4.674 up    |
| LMO2137 | 4.918 up    |
| LMO2138 | 2.632 up    |
| LMO2144 | 7.601 down  |
| LMO2156 | 19.914 down |
| LMO2159 | 3.858 up    |
| LMO2160 | 4.678 up    |
| LMO2161 | 5.420 up    |
| LMO2162 | 7.140 up    |
| LMO2163 | 4.940 up    |
| LMO2164 | 3.122 down  |
| LMO2165 | 4.530 down  |
| LMO2166 | 3.586 down  |
| LMO2167 | 4.796 down  |
| LMO2171 | 4.328 up    |
| LMO2172 | 3.028 up    |
| LMO2175 | 11.559 up   |
| LMO2176 | 2.722 down  |
| LMO2177 | 4.719 down  |
| LMO2179 | 4.559 down  |
| LMO2181 | 2.375 down  |
| LMO2183 | 3.141 down  |
| LMO2184 | 2.899 down  |
| LMO2187 | 6.786 down  |
| LMO2191 | 2.466 down  |
| LMO2195 | 2.921 down  |
| LMO2197 | 26.870 down |
| LMO2201 | 3.116 down  |
| LMO2202 | 11.536 down |

|         |             |
|---------|-------------|
| LMO2203 | 5.019 down  |
| LMO2207 | 3.832 down  |
| LMO2208 | 4.914 down  |
| LMO2209 | 4.502 down  |
| LMO2210 | 4.537 up    |
| LMO2211 | 5.242 down  |
| LMO2212 | 6.354 down  |
| LMO2216 | 2.160 down  |
| LMO2217 | 2.221 down  |
| LMO2218 | 7.653 down  |
| LMO2219 | 2.097 down  |
| LMO2223 | 6.357 down  |
| LMO2225 | 3.321 down  |
| LMO2229 | 2.110 down  |
| LMO2233 | 8.219 down  |
| LMO2234 | 2.086 down  |
| LMO2235 | 2.531 down  |
| LMO2236 | 2.781 down  |
| LMO2237 | 3.296 down  |
| LMO2238 | 3.234 down  |
| LMO2239 | 17.244 down |
| LMO2240 | 9.975 down  |
| LMO2241 | 17.022 down |
| LMO2242 | 2.815 down  |
| LMO2243 | 7.507 down  |
| LMO2244 | 7.010 down  |
| LMO2245 | 3.588 down  |
| LMO2246 | 3.249 down  |
| LMO2247 | 3.422 down  |
| LMO2248 | 2.554 down  |
| LMO2249 | 3.009 down  |
| LMO2253 | 3.599 down  |
| LMO2254 | 2.762 down  |
| LMO2255 | 2.259 down  |
| LMO2258 | 2.358 up    |
| LMO2259 | 7.594 down  |
| LMO2260 | 7.659 down  |
| LMO2261 | 2.613 down  |
| LMO2262 | 3.059 down  |
| LMO2263 | 2.813 down  |
| LMO2270 | 2.764 down  |
| LMO2278 | 3.033 up    |
| LMO2279 | 2.002 up    |
| LMO2281 | 2.399 up    |
| LMO2282 | 2.290 up    |
| LMO2285 | 2.063 up    |
| LMO2286 | 2.261 up    |
| LMO2287 | 2.144 up    |



|         |             |
|---------|-------------|
| LMO2288 | 2.511 up    |
| LMO2289 | 2.047 up    |
| LMO2292 | 2.000 up    |
| LMO2294 | 2.142 up    |
| LMO2298 | 2.563 up    |
| LMO2299 | 2.742 up    |
| LMO2300 | 2.019 up    |
| LMO2301 | 2.780 up    |
| LMO2303 | 2.974 up    |
| LMO2304 | 2.331 up    |
| LMO2305 | 2.353 up    |
| LMO2306 | 2.759 up    |
| LMO2307 | 2.176 up    |
| LMO2308 | 2.406 up    |
| LMO2311 | 2.328 up    |
| LMO2312 | 2.002 up    |
| LMO2314 | 2.149 up    |
| LMO2315 | 2.405 up    |
| LMO2316 | 2.104 up    |
| LMO2317 | 2.253 up    |
| LMO2320 | 2.712 up    |
| LMO2321 | 2.449 up    |
| LMO2322 | 2.217 up    |
| LMO2323 | 2.013 up    |
| LMO2324 | 2.252 up    |
| LMO2325 | 2.295 up    |
| LMO2326 | 2.602 up    |
| LMO2327 | 2.428 up    |
| LMO2328 | 2.025 up    |
| LMO2334 | 3.199 down  |
| LMO2337 | 2.700 down  |
| LMO2344 | 2.434 down  |
| LMO2345 | 3.195 down  |
| LMO2346 | 2.963 down  |
| LMO2347 | 4.540 down  |
| LMO2348 | 6.239 down  |
| LMO2349 | 5.964 down  |
| LMO2350 | 8.358 down  |
| LMO2351 | 14.777 down |
| LMO2352 | 77.367 down |
| LMO2353 | 2.591 down  |
| LMO2354 | 3.753 down  |
| LMO2355 | 4.781 down  |
| LMO2359 | 2.154 down  |
| LMO2364 | 2.596 down  |
| LMO2365 | 5.004 down  |
| LMO2369 | 3.805 down  |
| LMO2371 | 3.513 down  |

|         |             |
|---------|-------------|
| LMO2372 | 3.150 down  |
| LMO2374 | 7.454 down  |
| LMO2375 | 4.651 down  |
| LMO2376 | 3.454 down  |
| LMO2377 | 15.914 down |
| LMO2378 | 7.010 down  |
| LMO2379 | 4.573 down  |
| LMO2380 | 3.651 down  |
| LMO2381 | 3.614 down  |
| LMO2382 | 2.013 down  |
| LMO2383 | 2.292 down  |
| LMO2384 | 2.662 down  |
| LMO2386 | 3.269 down  |
| LMO2388 | 6.216 down  |
| LMO2390 | 6.054 down  |
| LMO2391 | 2.256 up    |
| LMO2392 | 4.269 down  |
| LMO2393 | 2.370 down  |
| LMO2395 | 10.597 down |
| LMO2396 | 2.831 down  |
| LMO2397 | 12.483 down |
| LMO2400 | 2.894 down  |
| LMO2401 | 2.873 down  |
| LMO2402 | 2.389 down  |
| LMO2403 | 3.363 down  |
| LMO2404 | 2.130 down  |
| LMO2405 | 3.315 down  |
| LMO2407 | 2.205 down  |
| LMO2408 | 8.346 down  |
| LMO2409 | 18.291 down |
| LMO2410 | 4.216 down  |
| LMO2416 | 7.623 down  |
| LMO2417 | 3.323 down  |
| LMO2418 | 4.356 down  |
| LMO2419 | 4.779 down  |
| LMO2420 | 2.294 down  |
| LMO2422 | 2.050 down  |
| LMO2423 | 2.574 down  |
| LMO2424 | 12.433 down |
| LMO2426 | 2.118 down  |
| LMO2427 | 6.723 down  |
| LMO2428 | 11.633 down |
| LMO2429 | 2.093 down  |
| LMO2431 | 3.083 down  |
| LMO2433 | 8.814 down  |
| LMO2435 | 10.074 down |
| LMO2437 | 2.096 down  |
| LMO2438 | 2.806 down  |

|         |             |
|---------|-------------|
| LMO2439 | 4.660 down  |
| LMO2440 | 2.530 down  |
| LMO2441 | 3.516 down  |
| LMO2442 | 5.342 down  |
| LMO2443 | 11.332 down |
| LMO2446 | 2.075 down  |
| LMO2447 | 2.563 down  |
| LMO2450 | 2.223 down  |
| LMO2451 | 3.565 down  |
| LMO2460 | 4.472 down  |
| LMO2464 | 19.310 down |
| LMO2465 | 12.356 down |
| LMO2466 | 23.777 down |
| LMO2467 | 4.725 down  |
| LMO2469 | 5.495 down  |
| LMO2474 | 2.785 down  |
| LMO2475 | 4.053 down  |
| LMO2476 | 5.703 down  |
| LMO2477 | 4.028 down  |
| LMO2478 | 2.226 down  |
| LMO2479 | 2.215 down  |
| LMO2480 | 4.289 down  |
| LMO2481 | 2.405 down  |
| LMO2482 | 2.696 down  |
| LMO2483 | 2.925 down  |
| LMO2486 | 2.402 up    |
| LMO2487 | 8.833 up    |
| LMO2490 | 3.193 down  |
| LMO2491 | 5.100 down  |
| LMO2492 | 8.223 down  |
| LMO2493 | 12.713 down |
| LMO2497 | 2.019 down  |
| LMO2502 | 3.594 down  |
| LMO2503 | 4.485 down  |
| LMO2504 | 10.859 down |
| LMO2505 | 5.283 down  |
| LMO2506 | 5.763 down  |
| LMO2507 | 4.759 down  |
| LMO2508 | 3.234 down  |
| LMO2509 | 3.025 down  |
| LMO2510 | 2.388 down  |
| LMO2511 | 4.051 up    |
| LMO2512 | 3.935 down  |
| LMO2513 | 6.232 down  |
| LMO2516 | 9.072 down  |
| LMO2517 | 6.383 down  |
| LMO2518 | 7.121 down  |
| LMO2519 | 6.836 down  |

|         |             |
|---------|-------------|
| LMO2520 | 3.975 down  |
| LMO2521 | 9.508 down  |
| LMO2522 | 4.623 down  |
| LMO2524 | 3.235 down  |
| LMO2525 | 2.990 down  |
| LMO2526 | 6.865 down  |
| LMO2527 | 8.051 down  |
| LMO2535 | 2.062 down  |
| LMO2537 | 4.218 down  |
| LMO2538 | 3.870 down  |
| LMO2540 | 3.464 down  |
| LMO2541 | 2.267 down  |
| LMO2542 | 2.147 down  |
| LMO2543 | 2.515 down  |
| LMO2544 | 3.794 down  |
| LMO2545 | 8.347 down  |
| LMO2546 | 4.609 down  |
| LMO2547 | 13.696 down |
| LMO2548 | 2.291 down  |
| LMO2549 | 8.644 down  |
| LMO2550 | 9.249 down  |
| LMO2551 | 7.722 down  |
| LMO2552 | 4.115 down  |
| LMO2553 | 3.107 down  |
| LMO2554 | 3.035 down  |
| LMO2555 | 2.283 down  |
| LMO2557 | 3.443 down  |
| LMO2558 | 3.296 down  |
| LMO2559 | 9.650 down  |
| LMO2560 | 2.461 down  |
| LMO2561 | 5.161 down  |
| LMO2562 | 4.962 down  |
| LMO2563 | 8.605 down  |
| LMO2564 | 4.150 down  |
| LMO2565 | 2.849 down  |
| LMO2566 | 3.867 down  |
| LMO2567 | 21.833 up   |
| LMO2568 | 12.415 up   |
| LMO2569 | 4.195 down  |
| LMO2570 | 2.521 up    |
| LMO2576 | 3.222 down  |
| LMO2577 | 7.649 down  |
| LMO2579 | 2.622 down  |
| LMO2584 | 3.892 up    |
| LMO2585 | 11.917 up   |
| LMO2586 | 10.877 up   |
| LMO2587 | 7.533 down  |
| LMO2590 | 2.106 down  |

|         |             |
|---------|-------------|
| LMO2591 | 20.004 down |
| LMO2593 | 2.135 up    |
| LMO2594 | 2.592 down  |
| LMO2595 | 3.099 down  |
| LMO2596 | 5.748 down  |
| LMO2597 | 2.566 down  |
| LMO2598 | 2.439 down  |
| LMO2599 | 3.584 down  |
| LMO2600 | 2.821 down  |
| LMO2601 | 4.233 down  |
| LMO2604 | 2.210 down  |
| LMO2605 | 2.731 down  |
| LMO2628 | 2.175 down  |
| LMO2629 | 2.088 down  |
| LMO2630 | 2.050 down  |
| LMO2633 | 2.267 down  |
| LMO2634 | 4.298 down  |
| LMO2635 | 2.508 down  |
| LMO2636 | 2.354 down  |
| LMO2639 | 3.436 down  |
| LMO2640 | 2.727 down  |
| LMO2641 | 2.693 down  |
| LMO2642 | 2.074 down  |
| LMO2644 | 2.217 down  |
| LMO2645 | 142.954 up  |
| LMO2646 | 84.283 up   |
| LMO2647 | 144.279 up  |
| LMO2648 | 92.415 up   |
| LMO2649 | 48.264 up   |
| LMO2650 | 29.323 up   |
| LMO2651 | 33.793 up   |
| LMO2658 | 3.866 down  |
| LMO2659 | 3.035 up    |
| LMO2660 | 4.089 up    |
| LMO2661 | 16.768 up   |
| LMO2662 | 13.639 up   |
| LMO2663 | 21.145 up   |
| LMO2664 | 16.266 up   |
| LMO2665 | 20.652 up   |
| LMO2666 | 17.375 up   |
| LMO2667 | 8.907 up    |
| LMO2668 | 8.715 up    |
| LMO2670 | 2.899 up    |
| LMO2671 | 2.377 up    |
| LMO2673 | 3.022 up    |
| LMO2674 | 4.027 up    |
| LMO2680 | 2.308 up    |
| LMO2681 | 2.615 up    |

|         |             |
|---------|-------------|
| LMO2682 | 2.860 up    |
| LMO2683 | 5.149 up    |
| LMO2684 | 7.871 up    |
| LMO2685 | 11.108 up   |
| LMO2686 | 13.178 down |
| LMO2687 | 6.297 down  |
| LMO2688 | 6.261 down  |
| LMO2689 | 12.132 down |
| LMO2690 | 43.573 down |
| LMO2696 | 2.110 up    |
| LMO2697 | 2.230 up    |
| LMO2700 | 2.273 down  |
| LMO2703 | 2.115 down  |
| LMO2704 | 3.086 down  |
| LMO2708 | 9.915 up    |
| LMO2710 | 10.464 down |
| LMO2711 | 3.311 down  |
| LMO2712 | 2.311 down  |
| LMO2713 | 3.901 up    |
| LMO2714 | 3.557 up    |
| LMO2718 | 2.063 down  |
| LMO2719 | 8.847 down  |
| LMO2720 | 18.115 down |
| LMO2721 | 2.589 down  |
| LMO2725 | 3.205 down  |
| LMO2726 | 11.039 down |
| LMO2727 | 8.202 down  |
| LMO2728 | 2.029 down  |
| LMO2733 | 4.004 up    |
| LMO2734 | 6.173 up    |
| LMO2735 | 7.069 up    |
| LMO2736 | 3.193 up    |
| LMO2737 | 10.125 down |
| LMO2742 | 5.680 up    |
| LMO2743 | 4.035 up    |
| LMO2744 | 6.674 down  |
| LMO2746 | 2.365 down  |
| LMO2749 | 9.334 down  |
| LMO2750 | 4.252 down  |
| LMO2753 | 8.684 down  |
| LMO2754 | 4.402 down  |
| LMO2755 | 2.108 down  |
| LMO2756 | 3.713 down  |
| LMO2757 | 2.775 down  |
| LMO2758 | 5.229 down  |
| LMO2761 | 2.004 down  |
| LMO2765 | 2.263 down  |
| LMO2766 | 6.440 down  |

|         |            |
|---------|------------|
| LMO2767 | 4.135 down |
| LMO2768 | 5.786 down |
| LMO2769 | 7.340 down |
| LMO2770 | 3.247 down |
| LMO2771 | 3.346 up   |
| LMO2772 | 4.320 up   |
| LMO2774 | 5.646 down |
| LMO2775 | 2.706 down |
| LMO2777 | 7.495 down |
| LMO2779 | 9.225 down |
| LMO2780 | 3.593 up   |
| LMO2781 | 30.740 up  |
| LMO2782 | 31.364 up  |
| LMO2783 | 17.189 up  |
| LMO2785 | 2.119 down |
| LMO2786 | 3.615 down |
| LMO2787 | 3.786 down |
| LMO2788 | 3.059 down |
| LMO2789 | 3.421 down |
| LMO2790 | 2.450 down |
| LMO2791 | 2.972 down |
| LMO2793 | 8.263 down |
| LMO2794 | 5.549 down |
| LMO2795 | 2.831 down |
| LMO2799 | 18.475 up  |
| LMO2800 | 19.916 up  |
| LMO2801 | 40.473 up  |
| LMO2802 | 3.386 down |
| LMO2803 | 3.195 down |
| LMO2810 | 6.275 down |
| LMO2811 | 9.541 down |
| LMO2814 | 5.111 down |
| LMO2816 | 9.502 up   |
| LMO2817 | 4.167 up   |
| LMO2818 | 4.878 up   |
| LMO2819 | 2.698 up   |
| LMO2820 | 2.829 down |
| LMO2823 | 2.441 down |
| LMO2826 | 7.378 down |
| LMO2827 | 6.883 down |
| LMO2829 | 9.549 down |
| LMO2830 | 4.195 down |
| LMO2831 | 3.806 down |
| LMO2832 | 2.397 down |
| LMO2833 | 2.287 down |
| LMO2840 | 2.574 down |
| LMO2841 | 4.629 down |
| LMO2842 | 6.577 down |

|         |             |
|---------|-------------|
| LMO2843 | 5.427 down  |
| LMO2844 | 5.491 down  |
| LMO2845 | 6.991 down  |
| LMO2846 | 3.303 up    |
| LMO2847 | 5.645 up    |
| LMO2848 | 12.426 up   |
| LMO2849 | 17.831 up   |
| LMO2850 | 21.620 up   |
| LMO2851 | 5.417 up    |
| LMO2852 | 10.756 down |
| LMO2853 | 2.314 down  |
| LMO2854 | 3.212 down  |
| LMO2855 | 4.737 down  |
| LMO2856 | 11.488 down |
| LMO2857 | 12.593 down |
