# Supplementary material for: Changes in Gene Expression during Adaptation of Listeria monocytogenes to the Soil Environment
Source: PubMed Central journal article supplement (PMC3179493; doi:10.1371/journal.pone.0024881), 2011-09-23
Supplement: pone.0024881.s003.pdf [file pone.0024881.s003.pdf]

Table S3. Genes over 2-fold change at time 18 hours.

|         |             |
|---------|-------------|
| LMO0001 | 3.071 down  |
| LMO0002 | 6.355 down  |
| LMO0003 | 10.910 down |
| LMO0005 | 4.527 down  |
| LMO0006 | 2.267 down  |
| LMO0007 | 3.728 down  |
| LMO0008 | 4.857 down  |
| LMO0009 | 8.731 down  |
| LMO0010 | 4.970 down  |
| LMO0011 | 2.333 down  |
| LMO0012 | 3.235 down  |
| LMO0013 | 6.724 down  |
| LMO0014 | 4.371 down  |
| LMO0015 | 5.296 down  |
| LMO0016 | 10.232 down |
| LMO0017 | 10.287 down |
| LMO0021 | 4.009 up    |
| LMO0022 | 4.137 up    |
| LMO0023 | 7.562 up    |
| LMO0024 | 7.031 up    |
| LMO0026 | 3.155 down  |
| LMO0027 | 21.795 up   |
| LMO0028 | 5.671 down  |
| LMO0029 | 8.831 down  |
| LMO0030 | 2.333 down  |
| LMO0031 | 5.518 down  |
| LMO0033 | 4.351 down  |
| LMO0034 | 5.929 down  |
| LMO0035 | 6.106 down  |
| LMO0036 | 2.636 down  |
| LMO0037 | 7.747 down  |
| LMO0040 | 7.806 down  |
| LMO0041 | 10.142 down |
| LMO0042 | 16.606 down |
| LMO0046 | 11.363 down |
| LMO0047 | 3.534 down  |
| LMO0048 | 3.936 down  |
| LMO0049 | 6.418 down  |
| LMO0050 | 10.258 down |
| LMO0051 | 7.118 down  |
| LMO0053 | 2.191 down  |
| LMO0055 | 43.181 down |
| LMO0057 | 4.811 down  |

|         |             |
|---------|-------------|
| LMO0058 | 3.616 down  |
| LMO0059 | 2.502 down  |
| LMO0060 | 3.114 down  |
| LMO0061 | 3.469 down  |
| LMO0062 | 2.716 down  |
| LMO0064 | 2.958 down  |
| LMO0065 | 2.647 down  |
| LMO0066 | 3.429 down  |
| LMO0067 | 5.198 down  |
| LMO0068 | 5.261 down  |
| LMO0069 | 5.076 down  |
| LMO0070 | 5.219 down  |
| LMO0071 | 16.778 down |
| LMO0072 | 16.010 down |
| LMO0073 | 8.568 down  |
| LMO0074 | 8.355 down  |
| LMO0075 | 31.929 down |
| LMO0076 | 7.530 down  |
| LMO0077 | 4.588 down  |
| LMO0078 | 2.991 down  |
| LMO0079 | 10.029 down |
| LMO0080 | 9.374 down  |
| LMO0081 | 4.261 down  |
| LMO0082 | 2.781 down  |
| LMO0084 | 6.433 down  |
| LMO0086 | 3.727 down  |
| LMO0089 | 3.177 down  |
| LMO0090 | 3.086 down  |
| LMO0091 | 2.733 down  |
| LMO0093 | 2.469 down  |
| LMO0094 | 2.726 down  |
| LMO0095 | 4.093 down  |
| LMO0099 | 11.313 down |
| LMO0100 | 3.343 down  |
| LMO0101 | 5.766 down  |
| LMO0102 | 3.492 down  |
| LMO0103 | 4.370 down  |
| LMO0104 | 3.329 down  |
| LMO0105 | 15.998 up   |
| LMO0106 | 11.713 down |
| LMO0107 | 9.974 down  |
| LMO0109 | 2.879 down  |
| LMO0110 | 2.974 down  |
| LMO0111 | 18.558 down |
| LMO0112 | 8.199 down  |
| LMO0115 | 2.029 up    |
| LMO0117 | 2.610 up    |
| LMO0118 | 2.523 up    |

|         |             |
|---------|-------------|
| LMO0119 | 3.265 up    |
| LMO0120 | 2.601 up    |
| LMO0121 | 2.498 up    |
| LMO0123 | 3.303 up    |
| LMO0124 | 2.080 up    |
| LMO0126 | 2.442 up    |
| LMO0127 | 3.154 up    |
| LMO0128 | 3.229 up    |
| LMO0130 | 3.091 down  |
| LMO0132 | 3.093 down  |
| LMO0135 | 2.518 down  |
| LMO0136 | 3.662 down  |
| LMO0137 | 3.326 down  |
| LMO0138 | 7.507 down  |
| LMO0139 | 10.033 down |
| LMO0140 | 11.060 down |
| LMO0142 | 5.365 down  |
| LMO0143 | 3.172 down  |
| LMO0144 | 5.162 down  |
| LMO0145 | 4.978 down  |
| LMO0146 | 2.975 down  |
| LMO0149 | 4.736 down  |
| LMO0150 | 2.995 down  |
| LMO0151 | 16.895 down |
| LMO0152 | 11.048 down |
| LMO0153 | 82.501 down |
| LMO0154 | 29.400 down |
| LMO0155 | 10.502 down |
| LMO0156 | 4.457 down  |
| LMO0157 | 3.340 down  |
| LMO0158 | 11.662 down |
| LMO0159 | 7.537 down  |
| LMO0160 | 6.111 down  |
| LMO0161 | 4.152 down  |
| LMO0162 | 4.081 down  |
| LMO0164 | 3.046 down  |
| LMO0165 | 3.823 down  |
| LMO0166 | 3.839 down  |
| LMO0167 | 5.977 down  |
| LMO0168 | 9.016 down  |
| LMO0169 | 6.332 down  |
| LMO0171 | 3.771 down  |
| LMO0173 | 4.279 down  |
| LMO0175 | 2.102 down  |
| LMO0176 | 9.874 down  |
| LMO0177 | 3.276 down  |
| LMO0178 | 5.160 down  |
| LMO0179 | 2.407 down  |

|         |             |
|---------|-------------|
| LMO0180 | 2.132 down  |
| LMO0182 | 2.056 down  |
| LMO0183 | 3.922 down  |
| LMO0184 | 5.471 down  |
| LMO0185 | 16.929 down |
| LMO0186 | 11.772 down |
| LMO0188 | 4.852 down  |
| LMO0189 | 4.045 down  |
| LMO0190 | 5.057 down  |
| LMO0191 | 2.274 down  |
| LMO0192 | 8.297 down  |
| LMO0193 | 3.410 down  |
| LMO0194 | 2.566 down  |
| LMO0197 | 2.195 down  |
| LMO0198 | 8.011 down  |
| LMO0199 | 9.697 down  |
| LMO0200 | 2.253 down  |
| LMO0201 | 3.359 down  |
| LMO0202 | 3.517 down  |
| LMO0204 | 5.819 down  |
| LMO0207 | 6.211 down  |
| LMO0208 | 10.323 down |
| LMO0209 | 4.221 down  |
| LMO0212 | 3.089 down  |
| LMO0213 | 7.527 down  |
| LMO0214 | 2.482 down  |
| LMO0217 | 12.409 down |
| LMO0218 | 6.685 down  |
| LMO0219 | 6.995 down  |
| LMO0221 | 5.521 down  |
| LMO0222 | 5.794 down  |
| LMO0223 | 3.050 down  |
| LMO0224 | 2.790 down  |
| LMO0225 | 3.663 down  |
| LMO0226 | 4.219 down  |
| LMO0227 | 3.171 down  |
| LMO0228 | 2.244 down  |
| LMO0229 | 2.275 down  |
| LMO0232 | 2.081 down  |
| LMO0233 | 2.123 down  |
| LMO0238 | 11.187 down |
| LMO0239 | 5.446 down  |
| LMO0240 | 4.685 down  |
| LMO0241 | 13.331 down |
| LMO0242 | 3.627 down  |
| LMO0243 | 6.566 down  |
| LMO0244 | 15.534 down |
| LMO0245 | 17.135 down |

|         |             |
|---------|-------------|
| LMO0246 | 2.849 down  |
| LMO0247 | 6.264 down  |
| LMO0248 | 4.890 down  |
| LMO0249 | 3.093 down  |
| LMO0250 | 2.498 down  |
| LMO0251 | 2.690 down  |
| LMO0252 | 16.323 down |
| LMO0253 | 6.005 down  |
| LMO0254 | 2.195 down  |
| LMO0256 | 3.403 down  |
| LMO0258 | 2.068 down  |
| LMO0260 | 17.619 down |
| LMO0262 | 4.713 down  |
| LMO0266 | 2.344 down  |
| LMO0268 | 4.987 down  |
| LMO0269 | 19.905 down |
| LMO0270 | 3.684 down  |
| LMO0271 | 2.597 down  |
| LMO0272 | 5.097 down  |
| LMO0273 | 12.275 down |
| LMO0275 | 2.216 down  |
| LMO0276 | 4.498 down  |
| LMO0277 | 3.225 down  |
| LMO0280 | 2.648 up    |
| LMO0281 | 5.345 down  |
| LMO0282 | 12.757 down |
| LMO0283 | 39.564 down |
| LMO0284 | 35.908 down |
| LMO0285 | 29.762 down |
| LMO0286 | 11.340 down |
| LMO0288 | 4.966 down  |
| LMO0289 | 5.982 down  |
| LMO0290 | 3.299 down  |
| LMO0291 | 3.171 down  |
| LMO0293 | 8.829 down  |
| LMO0294 | 12.327 down |
| LMO0295 | 3.856 down  |
| LMO0296 | 24.589 down |
| LMO0298 | 5.698 up    |
| LMO0299 | 8.432 up    |
| LMO0300 | 6.092 up    |
| LMO0301 | 4.396 up    |
| LMO0302 | 10.871 down |
| LMO0303 | 13.426 down |
| LMO0304 | 18.584 down |
| LMO0306 | 3.294 down  |
| LMO0307 | 2.191 down  |
| LMO0310 | 2.088 down  |

|         |             |
|---------|-------------|
| LMO0312 | 7.815 down  |
| LMO0313 | 11.375 down |
| LMO0314 | 4.700 down  |
| LMO0315 | 2.581 down  |
| LMO0316 | 8.150 down  |
| LMO0317 | 4.127 down  |
| LMO0318 | 11.517 down |
| LMO0320 | 2.949 down  |
| LMO0321 | 16.598 down |
| LMO0322 | 4.274 down  |
| LMO0325 | 4.310 down  |
| LMO0326 | 3.746 down  |
| LMO0327 | 2.963 down  |
| LMO0331 | 5.816 down  |
| LMO0332 | 8.965 down  |
| LMO0333 | 6.899 down  |
| LMO0335 | 2.262 down  |
| LMO0336 | 4.865 down  |
| LMO0337 | 8.798 down  |
| LMO0338 | 10.322 down |
| LMO0339 | 2.826 down  |
| LMO0344 | 3.672 up    |
| LMO0346 | 2.504 up    |
| LMO0348 | 3.171 up    |
| LMO0352 | 3.106 down  |
| LMO0353 | 5.933 down  |
| LMO0354 | 4.966 down  |
| LMO0356 | 4.147 down  |
| LMO0359 | 3.683 down  |
| LMO0360 | 5.705 down  |
| LMO0361 | 29.235 down |
| LMO0362 | 4.723 down  |
| LMO0363 | 4.484 down  |
| LMO0364 | 10.055 down |
| LMO0365 | 8.236 down  |
| LMO0366 | 8.401 down  |
| LMO0367 | 5.772 down  |
| LMO0368 | 5.874 down  |
| LMO0369 | 2.285 down  |
| LMO0370 | 3.910 down  |
| LMO0371 | 7.891 down  |
| LMO0375 | 4.529 down  |
| LMO0376 | 2.735 down  |
| LMO0377 | 5.428 down  |
| LMO0382 | 5.791 down  |
| LMO0385 | 2.190 down  |
| LMO0387 | 4.633 down  |
| LMO0388 | 5.127 down  |

|         |             |
|---------|-------------|
| LMO0389 | 52.996 down |
| LMO0390 | 15.304 down |
| LMO0391 | 4.027 down  |
| LMO0392 | 2.138 down  |
| LMO0394 | 26.538 down |
| LMO0395 | 12.235 down |
| LMO0396 | 9.362 down  |
| LMO0397 | 3.216 down  |
| LMO0400 | 3.501 up    |
| LMO0401 | 5.745 up    |
| LMO0403 | 2.798 down  |
| LMO0404 | 6.903 down  |
| LMO0405 | 2.713 down  |
| LMO0406 | 8.219 down  |
| LMO0407 | 2.848 down  |
| LMO0409 | 5.097 down  |
| LMO0410 | 14.191 down |
| LMO0411 | 3.051 down  |
| LMO0412 | 2.799 down  |
| LMO0413 | 6.194 down  |
| LMO0414 | 5.517 down  |
| LMO0415 | 7.041 down  |
| LMO0417 | 3.724 down  |
| LMO0419 | 4.010 down  |
| LMO0420 | 3.172 down  |
| LMO0422 | 3.241 down  |
| LMO0425 | 3.755 down  |
| LMO0426 | 2.534 down  |
| LMO0427 | 2.405 down  |
| LMO0429 | 3.227 down  |
| LMO0430 | 13.421 down |
| LMO0431 | 5.395 down  |
| LMO0432 | 2.167 down  |
| LMO0435 | 9.142 down  |
| LMO0436 | 15.826 down |
| LMO0438 | 2.491 down  |
| LMO0439 | 3.765 down  |
| LMO0440 | 8.689 down  |
| LMO0441 | 5.072 down  |
| LMO0442 | 3.015 down  |
| LMO0444 | 9.365 down  |
| LMO0448 | 3.246 down  |
| LMO0449 | 14.827 down |
| LMO0450 | 6.128 down  |
| LMO0451 | 3.408 down  |
| LMO0452 | 9.194 down  |
| LMO0453 | 9.388 down  |
| LMO0454 | 11.313 down |

|         |             |
|---------|-------------|
| LMO0455 | 11.272 down |
| LMO0456 | 5.724 down  |
| LMO0457 | 7.949 down  |
| LMO0458 | 7.420 down  |
| LMO0459 | 3.617 down  |
| LMO0460 | 2.430 down  |
| LMO0462 | 3.520 down  |
| LMO0463 | 3.940 down  |
| LMO0465 | 6.807 down  |
| LMO0466 | 5.272 down  |
| LMO0467 | 4.111 down  |
| LMO0468 | 5.590 down  |
| LMO0469 | 28.622 down |
| LMO0470 | 11.662 down |
| LMO0472 | 6.338 down  |
| LMO0473 | 9.972 down  |
| LMO0474 | 10.628 down |
| LMO0475 | 4.101 down  |
| LMO0476 | 5.185 down  |
| LMO0477 | 81.494 down |
| LMO0478 | 23.585 down |
| LMO0479 | 13.266 down |
| LMO0480 | 9.079 down  |
| LMO0482 | 4.612 down  |
| LMO0483 | 4.347 down  |
| LMO0484 | 7.722 down  |
| LMO0485 | 20.053 down |
| LMO0486 | 6.699 down  |
| LMO0487 | 2.192 down  |
| LMO0488 | 2.205 down  |
| LMO0489 | 2.042 down  |
| LMO0490 | 4.509 down  |
| LMO0491 | 9.566 down  |
| LMO0492 | 10.454 down |
| LMO0493 | 6.585 down  |
| LMO0494 | 3.138 down  |
| LMO0495 | 6.287 down  |
| LMO0497 | 28.157 down |
| LMO0498 | 2.243 down  |
| LMO0499 | 2.242 down  |
| LMO0500 | 3.134 down  |
| LMO0501 | 2.570 down  |
| LMO0509 | 5.219 down  |
| LMO0510 | 9.999 down  |
| LMO0511 | 12.254 down |
| LMO0512 | 4.020 down  |
| LMO0513 | 7.318 down  |
| LMO0514 | 5.895 down  |



|         |             |
|---------|-------------|
| LMO0515 | 3.180 up    |
| LMO0516 | 5.289 down  |
| LMO0518 | 5.983 down  |
| LMO0519 | 9.048 down  |
| LMO0520 | 2.888 down  |
| LMO0522 | 12.208 down |
| LMO0523 | 6.182 down  |
| LMO0524 | 3.361 down  |
| LMO0525 | 18.281 down |
| LMO0526 | 4.381 down  |
| LMO0527 | 14.697 down |
| LMO0528 | 7.717 down  |
| LMO0529 | 3.532 down  |
| LMO0531 | 2.050 down  |
| LMO0532 | 5.838 down  |
| LMO0533 | 17.260 down |
| LMO0534 | 2.774 down  |
| LMO0535 | 2.822 down  |
| LMO0537 | 10.023 down |
| LMO0538 | 4.970 down  |
| LMO0540 | 10.682 up   |
| LMO0541 | 6.293 down  |
| LMO0544 | 6.960 up    |
| LMO0545 | 2.105 up    |
| LMO0547 | 10.557 down |
| LMO0548 | 2.727 down  |
| LMO0549 | 4.160 down  |
| LMO0550 | 7.605 down  |
| LMO0551 | 8.341 down  |
| LMO0552 | 10.186 down |
| LMO0554 | 2.488 down  |
| LMO0557 | 4.664 down  |
| LMO0558 | 7.197 down  |
| LMO0559 | 13.487 down |
| LMO0560 | 11.762 down |
| LMO0563 | 4.101 down  |
| LMO0564 | 4.625 down  |
| LMO0565 | 2.737 down  |
| LMO0566 | 5.321 down  |
| LMO0567 | 4.868 down  |
| LMO0568 | 4.459 down  |
| LMO0569 | 8.891 down  |
| LMO0570 | 5.443 down  |
| LMO0571 | 5.379 down  |
| LMO0572 | 2.660 down  |
| LMO0573 | 7.285 down  |
| LMO0574 | 2.974 down  |
| LMO0575 | 5.011 down  |

|         |             |
|---------|-------------|
| LMO0576 | 7.830 down  |
| LMO0577 | 3.330 down  |
| LMO0578 | 2.152 down  |
| LMO0579 | 2.782 down  |
| LMO0581 | 8.487 down  |
| LMO0582 | 20.543 down |
| LMO0583 | 5.909 down  |
| LMO0584 | 3.542 up    |
| LMO0585 | 4.591 down  |
| LMO0586 | 9.111 down  |
| LMO0587 | 4.150 down  |
| LMO0588 | 11.567 down |
| LMO0589 | 8.257 down  |
| LMO0590 | 4.468 down  |
| LMO0591 | 2.737 down  |
| LMO0592 | 3.377 down  |
| LMO0593 | 3.349 down  |
| LMO0594 | 7.981 down  |
| LMO0595 | 7.006 down  |
| LMO0597 | 11.580 down |
| LMO0598 | 11.774 down |
| LMO0599 | 14.452 down |
| LMO0600 | 15.093 down |
| LMO0601 | 8.837 down  |
| LMO0603 | 4.902 down  |
| LMO0604 | 6.608 down  |
| LMO0605 | 4.434 down  |
| LMO0606 | 5.052 down  |
| LMO0608 | 2.013 down  |
| LMO0609 | 7.232 down  |
| LMO0611 | 21.554 down |
| LMO0612 | 3.279 down  |
| LMO0613 | 2.338 down  |
| LMO0614 | 13.731 down |
| LMO0615 | 7.607 down  |
| LMO0616 | 10.673 down |
| LMO0617 | 4.460 down  |
| LMO0618 | 9.597 down  |
| LMO0619 | 4.057 down  |
| LMO0620 | 4.599 down  |
| LMO0621 | 5.149 down  |
| LMO0623 | 6.355 down  |
| LMO0626 | 6.432 down  |
| LMO0627 | 3.511 down  |
| LMO0629 | 2.676 down  |
| LMO0632 | 2.038 down  |
| LMO0635 | 13.306 down |
| LMO0636 | 5.212 down  |

|         |             |
|---------|-------------|
| LMO0637 | 5.800 down  |
| LMO0638 | 15.790 down |
| LMO0639 | 4.240 down  |
| LMO0642 | 6.780 down  |
| LMO0643 | 3.187 up    |
| LMO0644 | 7.361 down  |
| LMO0645 | 9.814 down  |
| LMO0646 | 3.697 down  |
| LMO0647 | 3.461 down  |
| LMO0648 | 8.156 down  |
| LMO0649 | 5.101 down  |
| LMO0650 | 2.246 down  |
| LMO0652 | 3.447 down  |
| LMO0654 | 4.767 down  |
| LMO0655 | 2.919 down  |
| LMO0656 | 29.867 down |
| LMO0657 | 4.965 down  |
| LMO0658 | 40.813 down |
| LMO0659 | 5.918 down  |
| LMO0661 | 2.313 down  |
| LMO0662 | 9.287 down  |
| LMO0663 | 2.734 down  |
| LMO0664 | 12.971 down |
| LMO0665 | 8.155 down  |
| LMO0666 | 8.345 down  |
| LMO0667 | 3.898 down  |
| LMO0668 | 6.453 down  |
| LMO0669 | 2.779 down  |
| LMO0670 | 2.305 down  |
| LMO0671 | 6.657 down  |
| LMO0672 | 3.763 down  |
| LMO0673 | 71.540 up   |
| LMO0674 | 2.817 down  |
| LMO0675 | 5.291 down  |
| LMO0676 | 2.740 down  |
| LMO0677 | 7.065 down  |
| LMO0678 | 9.492 down  |
| LMO0679 | 94.171 down |
| LMO0680 | 19.583 down |
| LMO0681 | 7.523 down  |
| LMO0682 | 6.984 down  |
| LMO0683 | 41.616 down |
| LMO0684 | 14.620 down |
| LMO0685 | 7.425 down  |
| LMO0686 | 3.299 down  |
| LMO0687 | 5.893 down  |
| LMO0688 | 2.480 down  |
| LMO0691 | 6.752 down  |

|         |             |
|---------|-------------|
| LMO0692 | 2.386 down  |
| LMO0694 | 4.623 down  |
| LMO0695 | 5.065 down  |
| LMO0696 | 5.936 down  |
| LMO0700 | 2.133 down  |
| LMO0701 | 6.617 down  |
| LMO0702 | 3.474 down  |
| LMO0704 | 2.421 down  |
| LMO0705 | 2.575 down  |
| LMO0707 | 4.217 down  |
| LMO0708 | 2.271 down  |
| LMO0709 | 2.549 down  |
| LMO0710 | 2.375 down  |
| LMO0712 | 2.561 down  |
| LMO0713 | 2.548 down  |
| LMO0714 | 2.016 down  |
| LMO0715 | 2.222 down  |
| LMO0718 | 3.947 down  |
| LMO0721 | 8.926 down  |
| LMO0725 | 16.554 down |
| LMO0726 | 12.910 down |
| LMO0727 | 10.975 down |
| LMO0728 | 10.561 down |
| LMO0729 | 14.208 down |
| LMO0730 | 4.295 down  |
| LMO0731 | 3.536 down  |
| LMO0732 | 5.653 down  |
| LMO0733 | 13.809 down |
| LMO0734 | 11.564 down |
| LMO0738 | 3.892 down  |
| LMO0739 | 21.550 down |
| LMO0740 | 11.000 down |
| LMO0742 | 2.236 down  |
| LMO0744 | 2.238 down  |
| LMO0745 | 5.736 down  |
| LMO0749 | 4.402 down  |
| LMO0750 | 4.700 down  |
| LMO0751 | 3.037 down  |
| LMO0752 | 3.584 down  |
| LMO0753 | 3.413 down  |
| LMO0754 | 3.762 down  |
| LMO0755 | 6.595 down  |
| LMO0756 | 8.095 down  |
| LMO0757 | 5.098 down  |
| LMO0758 | 3.831 down  |
| LMO0759 | 2.693 down  |
| LMO0762 | 6.146 down  |
| LMO0763 | 5.132 down  |

|         |             |
|---------|-------------|
| LMO0764 | 7.875 down  |
| LMO0765 | 7.630 down  |
| LMO0767 | 3.504 down  |
| LMO0768 | 5.303 down  |
| LMO0769 | 7.872 down  |
| LMO0770 | 5.171 down  |
| LMO0771 | 17.565 down |
| LMO0772 | 11.845 down |
| LMO0773 | 6.416 down  |
| LMO0774 | 6.529 down  |
| LMO0776 | 7.082 down  |
| LMO0777 | 11.035 down |
| LMO0778 | 13.198 down |
| LMO0779 | 9.120 down  |
| LMO0781 | 4.114 down  |
| LMO0785 | 5.111 down  |
| LMO0786 | 2.726 down  |
| LMO0787 | 8.114 down  |
| LMO0788 | 3.864 down  |
| LMO0790 | 25.194 down |
| LMO0791 | 9.086 down  |
| LMO0792 | 2.846 down  |
| LMO0793 | 9.124 down  |
| LMO0795 | 6.842 down  |
| LMO0796 | 3.355 down  |
| LMO0797 | 4.466 down  |
| LMO0799 | 3.906 down  |
| LMO0801 | 4.798 down  |
| LMO0802 | 9.114 down  |
| LMO0803 | 11.525 down |
| LMO0804 | 8.926 down  |
| LMO0806 | 5.984 down  |
| LMO0807 | 3.865 down  |
| LMO0808 | 4.646 down  |
| LMO0809 | 3.155 down  |
| LMO0810 | 2.371 down  |
| LMO0811 | 2.916 down  |
| LMO0812 | 6.310 down  |
| LMO0813 | 2.017 down  |
| LMO0814 | 18.482 down |
| LMO0815 | 7.891 down  |
| LMO0816 | 7.123 down  |
| LMO0817 | 12.343 down |
| LMO0818 | 4.968 down  |
| LMO0819 | 2.666 down  |
| LMO0820 | 11.999 down |
| LMO0821 | 9.341 down  |
| LMO0822 | 8.803 down  |

|         |             |
|---------|-------------|
| LMO0824 | 6.932 down  |
| LMO0825 | 3.434 down  |
| LMO0826 | 6.136 down  |
| LMO0829 | 2.164 down  |
| LMO0830 | 6.174 down  |
| LMO0831 | 10.877 down |
| LMO0833 | 5.734 down  |
| LMO0834 | 11.066 down |
| LMO0835 | 26.350 down |
| LMO0836 | 43.153 down |
| LMO0837 | 8.412 down  |
| LMO0839 | 4.996 down  |
| LMO0840 | 24.753 down |
| LMO0841 | 8.905 down  |
| LMO0842 | 4.791 down  |
| LMO0844 | 6.310 down  |
| LMO0845 | 7.794 down  |
| LMO0846 | 6.763 down  |
| LMO0847 | 8.391 down  |
| LMO0848 | 19.234 down |
| LMO0849 | 2.809 down  |
| LMO0850 | 10.299 down |
| LMO0851 | 6.077 down  |
| LMO0852 | 12.156 down |
| LMO0853 | 6.340 down  |
| LMO0854 | 6.521 down  |
| LMO0855 | 7.246 down  |
| LMO0856 | 3.697 down  |
| LMO0857 | 6.348 down  |
| LMO0859 | 2.634 down  |
| LMO0860 | 4.061 down  |
| LMO0861 | 4.158 down  |
| LMO0863 | 3.741 down  |
| LMO0864 | 5.967 down  |
| LMO0866 | 6.383 down  |
| LMO0867 | 9.354 down  |
| LMO0868 | 4.008 down  |
| LMO0870 | 3.215 down  |
| LMO0871 | 2.924 down  |
| LMO0877 | 2.242 up    |
| LMO0879 | 2.074 up    |
| LMO0881 | 2.073 down  |
| LMO0882 | 17.175 down |
| LMO0883 | 30.168 down |
| LMO0884 | 4.599 down  |
| LMO0885 | 5.247 down  |
| LMO0886 | 3.145 down  |
| LMO0887 | 8.836 down  |

|         |             |
|---------|-------------|
| LMO0888 | 20.393 down |
| LMO0889 | 7.400 down  |
| LMO0890 | 9.746 down  |
| LMO0891 | 7.931 down  |
| LMO0892 | 2.465 down  |
| LMO0893 | 3.524 down  |
| LMO0894 | 2.833 down  |
| LMO0896 | 2.410 down  |
| LMO0897 | 2.284 down  |
| LMO0899 | 2.505 down  |
| LMO0900 | 11.736 down |
| LMO0901 | 2.955 down  |
| LMO0902 | 8.679 down  |
| LMO0903 | 6.121 down  |
| LMO0904 | 14.118 down |
| LMO0905 | 9.305 down  |
| LMO0906 | 2.745 down  |
| LMO0907 | 2.689 down  |
| LMO0908 | 20.232 down |
| LMO0909 | 21.304 down |
| LMO0910 | 6.115 down  |
| LMO0911 | 2.785 down  |
| LMO0912 | 11.266 down |
| LMO0914 | 3.314 up    |
| LMO0915 | 5.686 up    |
| LMO0916 | 11.860 up   |
| LMO0917 | 16.982 up   |
| LMO0919 | 2.598 down  |
| LMO0920 | 8.843 down  |
| LMO0921 | 7.439 down  |
| LMO0922 | 9.214 down  |
| LMO0923 | 5.644 down  |
| LMO0924 | 7.500 down  |
| LMO0925 | 8.493 down  |
| LMO0926 | 5.787 down  |
| LMO0927 | 7.548 down  |
| LMO0928 | 31.878 down |
| LMO0929 | 2.347 down  |
| LMO0931 | 2.925 down  |
| LMO0932 | 4.086 down  |
| LMO0933 | 3.065 down  |
| LMO0934 | 3.656 down  |
| LMO0935 | 8.455 down  |
| LMO0938 | 2.506 down  |
| LMO0939 | 31.920 down |
| LMO0940 | 2.144 down  |
| LMO0941 | 4.425 down  |
| LMO0944 | 4.114 down  |

|         |             |
|---------|-------------|
| LMO0945 | 2.610 down  |
| LMO0947 | 4.400 down  |
| LMO0948 | 6.579 down  |
| LMO0949 | 3.416 down  |
| LMO0950 | 6.325 down  |
| LMO0951 | 7.432 down  |
| LMO0952 | 6.264 down  |
| LMO0955 | 2.219 up    |
| LMO0957 | 2.481 up    |
| LMO0959 | 30.561 down |
| LMO0960 | 2.394 down  |
| LMO0961 | 3.809 down  |
| LMO0964 | 4.448 down  |
| LMO0965 | 4.118 down  |
| LMO0966 | 6.981 down  |
| LMO0967 | 6.577 down  |
| LMO0968 | 6.255 down  |
| LMO0969 | 7.154 down  |
| LMO0970 | 6.227 down  |
| LMO0971 | 5.483 down  |
| LMO0972 | 13.912 down |
| LMO0973 | 3.479 down  |
| LMO0974 | 7.100 down  |
| LMO0975 | 5.430 down  |
| LMO0976 | 6.230 down  |
| LMO0977 | 6.980 down  |
| LMO0978 | 6.250 down  |
| LMO0979 | 2.096 down  |
| LMO0980 | 2.668 down  |
| LMO0981 | 3.440 down  |
| LMO0982 | 2.248 down  |
| LMO0988 | 2.383 down  |
| LMO0989 | 2.605 down  |
| LMO0990 | 7.719 down  |
| LMO0995 | 6.601 down  |
| LMO0998 | 29.424 down |
| LMO0999 | 7.750 down  |
| LMO1000 | 23.386 down |
| LMO1001 | 20.720 down |
| LMO1002 | 2.410 down  |
| LMO1003 | 3.934 down  |
| LMO1004 | 6.430 down  |
| LMO1005 | 2.825 down  |
| LMO1006 | 4.148 down  |
| LMO1008 | 8.797 down  |
| LMO1009 | 6.287 down  |
| LMO1010 | 4.672 down  |
| LMO1011 | 3.560 down  |



|         |             |
|---------|-------------|
| LMO1012 | 3.382 down  |
| LMO1013 | 3.967 down  |
| LMO1014 | 6.031 down  |
| LMO1015 | 7.573 down  |
| LMO1016 | 7.890 down  |
| LMO1018 | 9.491 down  |
| LMO1019 | 4.463 down  |
| LMO1020 | 3.625 down  |
| LMO1021 | 3.054 down  |
| LMO1022 | 5.623 down  |
| LMO1023 | 5.248 down  |
| LMO1024 | 14.718 down |
| LMO1025 | 13.662 down |
| LMO1026 | 7.140 down  |
| LMO1027 | 9.197 down  |
| LMO1028 | 3.435 down  |
| LMO1029 | 3.831 down  |
| LMO1030 | 8.665 down  |
| LMO1031 | 5.855 down  |
| LMO1032 | 2.963 down  |
| LMO1033 | 3.050 down  |
| LMO1034 | 3.128 down  |
| LMO1035 | 5.534 down  |
| LMO1036 | 3.358 down  |
| LMO1037 | 5.463 down  |
| LMO1038 | 12.933 down |
| LMO1039 | 6.285 down  |
| LMO1040 | 2.625 down  |
| LMO1041 | 10.514 down |
| LMO1042 | 2.705 down  |
| LMO1044 | 2.855 down  |
| LMO1045 | 2.505 down  |
| LMO1046 | 2.629 down  |
| LMO1048 | 2.021 down  |
| LMO1050 | 6.381 down  |
| LMO1054 | 2.336 up    |
| LMO1056 | 7.320 down  |
| LMO1057 | 3.991 down  |
| LMO1058 | 4.722 down  |
| LMO1059 | 4.387 down  |
| LMO1060 | 9.010 down  |
| LMO1061 | 4.765 down  |
| LMO1063 | 2.120 down  |
| LMO1064 | 12.369 down |
| LMO1065 | 16.539 down |
| LMO1066 | 7.204 down  |
| LMO1067 | 4.605 down  |
| LMO1069 | 8.220 down  |

|         |             |
|---------|-------------|
| LMO1070 | 7.216 down  |
| LMO1071 | 10.246 down |
| LMO1072 | 2.509 down  |
| LMO1073 | 30.015 down |
| LMO1074 | 12.147 down |
| LMO1075 | 6.615 down  |
| LMO1076 | 7.749 down  |
| LMO1077 | 3.007 down  |
| LMO1078 | 12.284 down |
| LMO1079 | 14.248 down |
| LMO1080 | 6.452 down  |
| LMO1081 | 2.158 down  |
| LMO1082 | 5.378 down  |
| LMO1083 | 4.321 down  |
| LMO1084 | 22.054 down |
| LMO1085 | 4.803 down  |
| LMO1086 | 5.814 down  |
| LMO1088 | 13.644 down |
| LMO1089 | 11.310 down |
| LMO1090 | 8.399 down  |
| LMO1091 | 7.271 down  |
| LMO1092 | 6.972 down  |
| LMO1093 | 5.086 down  |
| LMO1094 | 2.101 down  |
| LMO1095 | 3.828 down  |
| LMO1096 | 3.159 down  |
| LMO1097 | 4.220 down  |
| LMO1100 | 7.335 down  |
| LMO1110 | 2.306 up    |
| LMO1116 | 5.501 down  |
| LMO1117 | 4.506 down  |
| LMO1118 | 15.864 down |
| LMO1119 | 20.207 down |
| LMO1120 | 20.539 down |
| LMO1121 | 2.534 down  |
| LMO1122 | 11.361 down |
| LMO1123 | 6.531 down  |
| LMO1124 | 9.847 down  |
| LMO1125 | 9.758 down  |
| LMO1126 | 7.828 down  |
| LMO1127 | 16.165 down |
| LMO1128 | 6.915 down  |
| LMO1129 | 8.244 down  |
| LMO1130 | 16.588 down |
| LMO1131 | 4.761 down  |
| LMO1132 | 2.881 down  |
| LMO1134 | 9.129 down  |
| LMO1135 | 13.881 down |

|         |       |      |
|---------|-------|------|
| LMO1136 | 5.644 | down |
| LMO1137 | 2.484 | down |
| LMO1141 | 8.313 | down |
| LMO1142 | 2.966 | down |
| LMO1143 | 2.354 | down |
| LMO1144 | 4.780 | down |
| LMO1145 | 6.850 | down |
| LMO1146 | 4.665 | down |
| LMO1147 | 6.519 | down |
| LMO1149 | 6.092 | down |
| LMO1150 | 4.778 | down |
| LMO1153 | 2.175 | down |
| LMO1155 | 2.477 | down |
| LMO1156 | 2.709 | down |
| LMO1157 | 2.012 | down |
| LMO1158 | 2.867 | down |
| LMO1159 | 4.511 | down |
| LMO1161 | 2.989 | down |
| LMO1162 | 7.624 | down |
| LMO1163 | 3.167 | down |
| LMO1165 | 4.464 | down |
| LMO1169 | 6.557 | down |
| LMO1170 | 6.896 | down |
| LMO1171 | 2.157 | down |
| LMO1172 | 6.946 | down |
| LMO1173 | 5.468 | down |
| LMO1175 | 4.011 | down |
| LMO1176 | 2.622 | down |
| LMO1177 | 2.525 | down |
| LMO1178 | 3.553 | down |
| LMO1179 | 5.553 | down |
| LMO1180 | 6.402 | down |
| LMO1181 | 8.766 | down |
| LMO1182 | 5.642 | down |
| LMO1183 | 6.203 | down |
| LMO1184 | 6.879 | down |
| LMO1185 | 6.004 | down |
| LMO1186 | 4.312 | down |
| LMO1188 | 6.409 | down |
| LMO1189 | 2.286 | down |
| LMO1190 | 5.512 | down |
| LMO1191 | 2.143 | down |
| LMO1192 | 6.445 | down |
| LMO1193 | 8.025 | down |
| LMO1194 | 8.384 | down |
| LMO1195 | 5.615 | down |
| LMO1196 | 7.249 | down |
| LMO1197 | 3.448 | down |

|         |             |
|---------|-------------|
| LMO1198 | 5.068 down  |
| LMO1199 | 8.003 down  |
| LMO1200 | 7.246 down  |
| LMO1201 | 4.884 down  |
| LMO1202 | 12.155 down |
| LMO1204 | 10.919 down |
| LMO1205 | 9.210 down  |
| LMO1206 | 14.025 down |
| LMO1207 | 5.886 down  |
| LMO1209 | 6.809 down  |
| LMO1210 | 47.665 down |
| LMO1211 | 11.291 down |
| LMO1212 | 9.153 down  |
| LMO1213 | 14.621 down |
| LMO1214 | 6.372 down  |
| LMO1215 | 4.447 down  |
| LMO1216 | 3.494 down  |
| LMO1217 | 2.069 down  |
| LMO1219 | 3.822 down  |
| LMO1220 | 2.852 down  |
| LMO1221 | 5.394 down  |
| LMO1222 | 3.927 down  |
| LMO1223 | 13.097 down |
| LMO1224 | 8.333 down  |
| LMO1225 | 18.708 down |
| LMO1226 | 2.953 down  |
| LMO1227 | 12.993 down |
| LMO1228 | 17.092 down |
| LMO1229 | 12.188 down |
| LMO1230 | 9.520 down  |
| LMO1231 | 5.857 down  |
| LMO1232 | 5.475 down  |
| LMO1233 | 3.072 down  |
| LMO1234 | 2.244 down  |
| LMO1235 | 8.277 down  |
| LMO1236 | 7.688 down  |
| LMO1237 | 14.616 down |
| LMO1238 | 7.628 down  |
| LMO1239 | 25.557 down |
| LMO1240 | 7.340 down  |
| LMO1242 | 3.624 down  |
| LMO1243 | 5.010 down  |
| LMO1244 | 5.903 down  |
| LMO1245 | 13.354 down |
| LMO1246 | 10.544 down |
| LMO1247 | 15.452 down |
| LMO1248 | 36.775 down |
| LMO1249 | 14.113 down |

|         |             |
|---------|-------------|
| LMO1250 | 5.058 down  |
| LMO1251 | 21.166 down |
| LMO1252 | 10.095 down |
| LMO1253 | 7.967 down  |
| LMO1257 | 2.905 down  |
| LMO1258 | 4.197 down  |
| LMO1259 | 5.240 down  |
| LMO1260 | 5.847 down  |
| LMO1261 | 2.920 down  |
| LMO1262 | 8.595 down  |
| LMO1266 | 9.753 down  |
| LMO1267 | 3.963 down  |
| LMO1268 | 6.035 down  |
| LMO1269 | 5.292 down  |
| LMO1270 | 7.755 down  |
| LMO1271 | 11.615 down |
| LMO1272 | 13.355 down |
| LMO1273 | 6.960 down  |
| LMO1274 | 5.559 down  |
| LMO1275 | 19.497 down |
| LMO1276 | 13.222 down |
| LMO1277 | 2.082 down  |
| LMO1278 | 4.089 down  |
| LMO1279 | 2.926 down  |
| LMO1280 | 13.992 down |
| LMO1281 | 4.936 down  |
| LMO1282 | 6.040 down  |
| LMO1283 | 4.778 down  |
| LMO1284 | 8.313 down  |
| LMO1285 | 4.574 down  |
| LMO1286 | 5.451 down  |
| LMO1287 | 2.360 down  |
| LMO1288 | 3.251 down  |
| LMO1290 | 3.610 down  |
| LMO1291 | 12.478 down |
| LMO1292 | 14.397 down |
| LMO1293 | 2.372 up    |
| LMO1294 | 12.130 down |
| LMO1296 | 10.527 down |
| LMO1297 | 6.302 down  |
| LMO1298 | 39.342 down |
| LMO1299 | 4.606 down  |
| LMO1300 | 16.732 down |
| LMO1303 | 2.365 down  |
| LMO1304 | 3.022 down  |
| LMO1305 | 3.573 down  |
| LMO1306 | 8.986 down  |
| LMO1307 | 13.148 down |

|         |             |
|---------|-------------|
| LMO1308 | 7.122 down  |
| LMO1309 | 7.743 down  |
| LMO1310 | 24.779 down |
| LMO1311 | 22.252 down |
| LMO1312 | 12.965 down |
| LMO1313 | 5.192 down  |
| LMO1314 | 6.758 down  |
| LMO1315 | 5.716 down  |
| LMO1316 | 9.142 down  |
| LMO1317 | 4.989 down  |
| LMO1318 | 4.015 down  |
| LMO1319 | 4.248 down  |
| LMO1320 | 4.132 down  |
| LMO1321 | 5.278 down  |
| LMO1322 | 3.839 down  |
| LMO1323 | 2.086 down  |
| LMO1324 | 4.054 down  |
| LMO1325 | 2.759 down  |
| LMO1326 | 5.703 down  |
| LMO1327 | 10.307 down |
| LMO1328 | 9.418 down  |
| LMO1329 | 5.531 down  |
| LMO1330 | 6.377 down  |
| LMO1331 | 13.323 down |
| LMO1333 | 11.753 down |
| LMO1334 | 9.650 down  |
| LMO1335 | 7.007 down  |
| LMO1336 | 2.486 down  |
| LMO1337 | 8.512 down  |
| LMO1338 | 7.868 down  |
| LMO1339 | 6.695 down  |
| LMO1340 | 3.225 down  |
| LMO1341 | 3.775 down  |
| LMO1342 | 2.064 down  |
| LMO1347 | 3.465 down  |
| LMO1349 | 2.276 up    |
| LMO1350 | 2.059 up    |
| LMO1351 | 3.082 down  |
| LMO1353 | 21.253 down |
| LMO1354 | 4.369 down  |
| LMO1355 | 5.444 down  |
| LMO1356 | 5.440 down  |
| LMO1357 | 4.106 down  |
| LMO1358 | 3.698 down  |
| LMO1359 | 6.154 down  |
| LMO1360 | 6.689 down  |
| LMO1361 | 3.989 down  |
| LMO1362 | 5.373 down  |

|         |             |
|---------|-------------|
| LMO1363 | 9.724 down  |
| LMO1364 | 3.418 down  |
| LMO1365 | 5.336 down  |
| LMO1366 | 7.097 down  |
| LMO1367 | 16.894 down |
| LMO1368 | 7.501 down  |
| LMO1369 | 12.563 down |
| LMO1370 | 7.792 down  |
| LMO1371 | 3.084 down  |
| LMO1372 | 3.491 down  |
| LMO1373 | 3.433 down  |
| LMO1374 | 2.129 down  |
| LMO1375 | 9.213 down  |
| LMO1376 | 2.311 down  |
| LMO1377 | 6.652 down  |
| LMO1378 | 6.594 down  |
| LMO1379 | 2.259 down  |
| LMO1380 | 4.209 down  |
| LMO1381 | 3.634 down  |
| LMO1382 | 4.833 down  |
| LMO1383 | 3.578 down  |
| LMO1384 | 10.791 down |
| LMO1385 | 9.437 down  |
| LMO1386 | 3.668 down  |
| LMO1387 | 7.201 down  |
| LMO1388 | 2.075 down  |
| LMO1389 | 2.544 down  |
| LMO1390 | 2.640 down  |
| LMO1391 | 2.494 down  |
| LMO1392 | 7.623 down  |
| LMO1393 | 3.891 down  |
| LMO1394 | 6.161 down  |
| LMO1395 | 53.343 down |
| LMO1396 | 14.172 down |
| LMO1397 | 5.582 down  |
| LMO1398 | 2.881 down  |
| LMO1399 | 5.100 down  |
| LMO1400 | 8.232 down  |
| LMO1401 | 11.751 down |
| LMO1402 | 7.130 down  |
| LMO1403 | 7.072 down  |
| LMO1404 | 2.895 down  |
| LMO1406 | 3.491 down  |
| LMO1407 | 2.541 down  |
| LMO1408 | 4.711 down  |
| LMO1409 | 10.877 down |
| LMO1410 | 9.947 down  |
| LMO1411 | 7.260 down  |

|         |             |
|---------|-------------|
| LMO1412 | 5.795 down  |
| LMO1413 | 6.892 down  |
| LMO1414 | 3.549 down  |
| LMO1415 | 4.021 down  |
| LMO1416 | 11.381 down |
| LMO1417 | 19.524 down |
| LMO1418 | 14.923 down |
| LMO1419 | 16.131 down |
| LMO1420 | 14.839 down |
| LMO1421 | 3.600 down  |
| LMO1422 | 2.028 down  |
| LMO1423 | 4.158 down  |
| LMO1424 | 2.292 down  |
| LMO1425 | 3.017 down  |
| LMO1426 | 2.095 down  |
| LMO1427 | 4.858 down  |
| LMO1428 | 15.392 down |
| LMO1429 | 18.686 down |
| LMO1430 | 5.502 down  |
| LMO1431 | 12.551 down |
| LMO1432 | 4.240 down  |
| LMO1433 | 2.659 down  |
| LMO1434 | 2.984 down  |
| LMO1435 | 5.875 down  |
| LMO1436 | 5.219 down  |
| LMO1437 | 10.189 down |
| LMO1438 | 4.547 down  |
| LMO1439 | 2.790 down  |
| LMO1440 | 36.429 down |
| LMO1441 | 13.223 down |
| LMO1442 | 12.369 down |
| LMO1443 | 6.018 down  |
| LMO1445 | 14.079 down |
| LMO1446 | 25.736 down |
| LMO1447 | 17.351 down |
| LMO1448 | 3.596 down  |
| LMO1449 | 8.315 down  |
| LMO1450 | 4.676 down  |
| LMO1451 | 6.459 down  |
| LMO1452 | 2.403 down  |
| LMO1453 | 4.750 down  |
| LMO1455 | 2.280 down  |
| LMO1456 | 2.685 down  |
| LMO1457 | 4.268 down  |
| LMO1458 | 3.476 down  |
| LMO1459 | 5.587 down  |
| LMO1460 | 3.001 down  |
| LMO1461 | 9.219 down  |



|         |             |
|---------|-------------|
| LMO1462 | 8.493 down  |
| LMO1463 | 8.486 down  |
| LMO1464 | 11.767 down |
| LMO1465 | 8.106 down  |
| LMO1466 | 7.548 down  |
| LMO1467 | 6.237 down  |
| LMO1468 | 3.620 down  |
| LMO1470 | 2.229 down  |
| LMO1474 | 2.433 down  |
| LMO1476 | 10.091 down |
| LMO1477 | 8.345 down  |
| LMO1478 | 2.041 down  |
| LMO1479 | 5.365 down  |
| LMO1480 | 7.470 down  |
| LMO1481 | 5.043 down  |
| LMO1483 | 9.383 down  |
| LMO1484 | 2.686 down  |
| LMO1485 | 16.856 down |
| LMO1486 | 13.877 down |
| LMO1487 | 10.840 down |
| LMO1488 | 7.557 down  |
| LMO1489 | 9.404 down  |
| LMO1490 | 6.990 down  |
| LMO1491 | 7.689 down  |
| LMO1492 | 15.308 down |
| LMO1493 | 3.178 down  |
| LMO1494 | 7.282 down  |
| LMO1495 | 7.813 down  |
| LMO1496 | 11.797 down |
| LMO1497 | 6.340 down  |
| LMO1498 | 19.316 down |
| LMO1499 | 15.563 down |
| LMO1500 | 9.605 down  |
| LMO1501 | 3.417 down  |
| LMO1503 | 2.331 down  |
| LMO1504 | 9.227 down  |
| LMO1505 | 3.025 down  |
| LMO1506 | 5.894 down  |
| LMO1507 | 4.573 down  |
| LMO1508 | 5.069 down  |
| LMO1509 | 2.201 down  |
| LMO1510 | 5.178 down  |
| LMO1511 | 3.828 down  |
| LMO1512 | 7.249 down  |
| LMO1513 | 5.504 down  |
| LMO1514 | 3.045 down  |
| LMO1515 | 17.312 down |
| LMO1516 | 10.918 down |

|         |              |
|---------|--------------|
| LMO1517 | 10.387 down  |
| LMO1518 | 4.462 down   |
| LMO1519 | 124.440 down |
| LMO1520 | 11.362 down  |
| LMO1521 | 5.823 down   |
| LMO1522 | 6.828 down   |
| LMO1523 | 3.866 down   |
| LMO1524 | 7.658 down   |
| LMO1525 | 9.452 down   |
| LMO1526 | 2.440 down   |
| LMO1527 | 2.644 down   |
| LMO1528 | 12.057 down  |
| LMO1529 | 4.051 down   |
| LMO1530 | 3.940 down   |
| LMO1531 | 3.339 down   |
| LMO1532 | 3.663 down   |
| LMO1533 | 3.389 down   |
| LMO1534 | 3.914 down   |
| LMO1535 | 2.938 down   |
| LMO1536 | 9.551 down   |
| LMO1537 | 7.686 down   |
| LMO1543 | 6.039 down   |
| LMO1544 | 4.413 down   |
| LMO1545 | 13.713 down  |
| LMO1546 | 5.227 down   |
| LMO1547 | 3.838 down   |
| LMO1548 | 3.454 down   |
| LMO1549 | 7.523 down   |
| LMO1550 | 3.255 down   |
| LMO1551 | 11.825 down  |
| LMO1552 | 5.479 down   |
| LMO1553 | 2.016 down   |
| LMO1554 | 7.009 down   |
| LMO1555 | 16.817 down  |
| LMO1556 | 10.509 down  |
| LMO1557 | 11.587 down  |
| LMO1558 | 14.111 down  |
| LMO1559 | 8.434 down   |
| LMO1560 | 5.917 down   |
| LMO1561 | 5.281 down   |
| LMO1562 | 3.554 down   |
| LMO1563 | 4.106 down   |
| LMO1564 | 4.642 down   |
| LMO1565 | 2.397 down   |
| LMO1566 | 7.996 down   |
| LMO1567 | 3.624 down   |
| LMO1568 | 40.628 down  |
| LMO1569 | 7.156 down   |

|         |             |
|---------|-------------|
| LMO1571 | 4.034 down  |
| LMO1572 | 3.974 down  |
| LMO1573 | 2.655 down  |
| LMO1574 | 3.782 down  |
| LMO1575 | 9.555 down  |
| LMO1576 | 8.078 down  |
| LMO1577 | 7.267 down  |
| LMO1578 | 4.431 down  |
| LMO1579 | 2.685 down  |
| LMO1581 | 4.200 down  |
| LMO1582 | 3.823 down  |
| LMO1583 | 35.512 down |
| LMO1584 | 11.551 down |
| LMO1585 | 16.129 down |
| LMO1586 | 7.982 down  |
| LMO1592 | 4.830 down  |
| LMO1593 | 6.199 down  |
| LMO1594 | 6.342 down  |
| LMO1595 | 5.976 down  |
| LMO1596 | 5.605 down  |
| LMO1597 | 4.247 down  |
| LMO1598 | 4.763 down  |
| LMO1599 | 7.448 down  |
| LMO1600 | 15.114 down |
| LMO1601 | 2.250 down  |
| LMO1603 | 5.886 down  |
| LMO1604 | 7.924 down  |
| LMO1605 | 4.854 down  |
| LMO1606 | 6.830 down  |
| LMO1607 | 4.928 down  |
| LMO1608 | 2.542 down  |
| LMO1609 | 2.774 down  |
| LMO1610 | 2.540 down  |
| LMO1611 | 2.235 down  |
| LMO1612 | 2.979 down  |
| LMO1613 | 5.944 down  |
| LMO1614 | 12.676 down |
| LMO1615 | 63.822 down |
| LMO1616 | 14.713 down |
| LMO1617 | 7.909 down  |
| LMO1618 | 8.322 down  |
| LMO1619 | 3.372 down  |
| LMO1620 | 2.229 down  |
| LMO1621 | 5.532 down  |
| LMO1622 | 11.229 down |
| LMO1623 | 10.341 down |
| LMO1624 | 4.003 down  |
| LMO1625 | 4.804 down  |

|         |             |
|---------|-------------|
| LMO1626 | 6.999 down  |
| LMO1627 | 4.717 down  |
| LMO1629 | 3.867 down  |
| LMO1630 | 2.656 down  |
| LMO1631 | 2.675 down  |
| LMO1633 | 2.911 down  |
| LMO1635 | 24.150 down |
| LMO1636 | 4.736 down  |
| LMO1638 | 2.377 down  |
| LMO1639 | 14.660 down |
| LMO1640 | 6.084 down  |
| LMO1641 | 7.733 down  |
| LMO1642 | 7.553 down  |
| LMO1643 | 7.371 down  |
| LMO1644 | 5.785 down  |
| LMO1645 | 4.675 down  |
| LMO1646 | 13.151 down |
| LMO1647 | 12.443 down |
| LMO1648 | 11.596 down |
| LMO1649 | 4.108 down  |
| LMO1652 | 2.067 down  |
| LMO1653 | 7.970 down  |
| LMO1654 | 14.133 down |
| LMO1655 | 2.615 down  |
| LMO1656 | 9.322 down  |
| LMO1657 | 4.335 down  |
| LMO1658 | 3.149 down  |
| LMO1659 | 3.208 down  |
| LMO1660 | 5.857 down  |
| LMO1661 | 2.267 down  |
| LMO1662 | 4.241 down  |
| LMO1664 | 20.770 down |
| LMO1665 | 19.634 down |
| LMO1667 | 26.768 down |
| LMO1669 | 12.110 down |
| LMO1671 | 22.065 down |
| LMO1672 | 2.358 down  |
| LMO1673 | 3.891 down  |
| LMO1674 | 2.607 down  |
| LMO1675 | 4.273 down  |
| LMO1676 | 4.604 down  |
| LMO1677 | 16.675 down |
| LMO1678 | 6.428 down  |
| LMO1679 | 2.251 down  |
| LMO1680 | 3.905 down  |
| LMO1681 | 5.082 down  |
| LMO1682 | 5.256 down  |
| LMO1684 | 2.339 down  |

|         |             |
|---------|-------------|
| LMO1685 | 3.522 down  |
| LMO1686 | 3.823 down  |
| LMO1687 | 7.556 down  |
| LMO1688 | 9.105 down  |
| LMO1689 | 13.679 down |
| LMO1691 | 3.031 down  |
| LMO1692 | 5.857 down  |
| LMO1693 | 8.277 down  |
| LMO1695 | 5.763 down  |
| LMO1696 | 21.415 down |
| LMO1697 | 3.830 down  |
| LMO1698 | 6.719 down  |
| LMO1699 | 2.183 down  |
| LMO1700 | 4.032 down  |
| LMO1701 | 4.628 down  |
| LMO1702 | 5.148 down  |
| LMO1703 | 5.722 down  |
| LMO1704 | 2.546 down  |
| LMO1705 | 5.317 down  |
| LMO1706 | 7.264 down  |
| LMO1707 | 7.276 down  |
| LMO1708 | 5.637 down  |
| LMO1709 | 4.791 down  |
| LMO1710 | 14.133 down |
| LMO1711 | 5.026 down  |
| LMO1712 | 5.026 down  |
| LMO1713 | 11.250 down |
| LMO1715 | 3.484 down  |
| LMO1716 | 5.478 down  |
| LMO1717 | 5.218 down  |
| LMO1718 | 3.359 up    |
| LMO1719 | 3.187 up    |
| LMO1720 | 2.066 up    |
| LMO1721 | 5.326 down  |
| LMO1722 | 13.629 down |
| LMO1723 | 19.235 down |
| LMO1724 | 23.030 down |
| LMO1725 | 13.835 down |
| LMO1726 | 2.960 down  |
| LMO1727 | 3.310 down  |
| LMO1728 | 2.030 down  |
| LMO1730 | 2.573 up    |
| LMO1732 | 8.345 down  |
| LMO1733 | 2.995 down  |
| LMO1734 | 4.560 down  |
| LMO1735 | 16.047 down |
| LMO1736 | 43.469 down |
| LMO1737 | 7.464 down  |

|         |             |
|---------|-------------|
| LMO1738 | 37.999 down |
| LMO1739 | 36.933 down |
| LMO1740 | 41.023 down |
| LMO1741 | 3.201 down  |
| LMO1742 | 5.167 down  |
| LMO1743 | 5.799 down  |
| LMO1744 | 14.681 down |
| LMO1745 | 4.972 down  |
| LMO1746 | 6.635 down  |
| LMO1747 | 4.367 down  |
| LMO1748 | 15.679 down |
| LMO1749 | 46.524 down |
| LMO1750 | 8.973 down  |
| LMO1751 | 5.074 down  |
| LMO1752 | 7.923 down  |
| LMO1753 | 6.299 down  |
| LMO1754 | 6.120 down  |
| LMO1755 | 5.755 down  |
| LMO1756 | 3.556 down  |
| LMO1757 | 2.243 down  |
| LMO1760 | 4.657 down  |
| LMO1761 | 12.131 down |
| LMO1762 | 11.885 down |
| LMO1763 | 4.936 down  |
| LMO1765 | 3.482 down  |
| LMO1766 | 3.399 down  |
| LMO1767 | 2.556 down  |
| LMO1770 | 8.339 down  |
| LMO1771 | 7.906 down  |
| LMO1772 | 4.949 down  |
| LMO1773 | 4.068 down  |
| LMO1774 | 2.490 down  |
| LMO1775 | 13.106 down |
| LMO1776 | 10.284 down |
| LMO1777 | 9.457 down  |
| LMO1778 | 8.677 down  |
| LMO1779 | 17.077 down |
| LMO1780 | 2.562 down  |
| LMO1781 | 6.067 down  |
| LMO1782 | 13.880 down |
| LMO1783 | 4.975 down  |
| LMO1784 | 2.625 down  |
| LMO1785 | 2.363 down  |
| LMO1786 | 3.603 down  |
| LMO1788 | 2.985 down  |
| LMO1789 | 2.103 down  |
| LMO1793 | 5.371 down  |
| LMO1794 | 7.691 down  |

|         |             |
|---------|-------------|
| LMO1795 | 4.179 down  |
| LMO1796 | 4.704 down  |
| LMO1797 | 5.820 down  |
| LMO1798 | 3.233 down  |
| LMO1799 | 3.006 down  |
| LMO1801 | 3.676 down  |
| LMO1802 | 8.276 down  |
| LMO1803 | 4.097 down  |
| LMO1804 | 2.918 down  |
| LMO1805 | 11.539 down |
| LMO1806 | 4.054 down  |
| LMO1807 | 8.294 down  |
| LMO1808 | 6.883 down  |
| LMO1809 | 17.388 down |
| LMO1810 | 17.393 down |
| LMO1811 | 12.683 down |
| LMO1812 | 6.911 down  |
| LMO1813 | 4.273 down  |
| LMO1814 | 5.081 down  |
| LMO1815 | 16.726 down |
| LMO1817 | 6.673 down  |
| LMO1818 | 10.596 down |
| LMO1819 | 3.581 down  |
| LMO1820 | 3.680 down  |
| LMO1821 | 3.647 down  |
| LMO1822 | 2.373 down  |
| LMO1823 | 8.520 down  |
| LMO1824 | 2.301 down  |
| LMO1825 | 4.740 down  |
| LMO1826 | 10.656 down |
| LMO1827 | 6.503 down  |
| LMO1828 | 10.653 down |
| LMO1829 | 2.958 down  |
| LMO1835 | 2.848 down  |
| LMO1838 | 3.718 down  |
| LMO1839 | 2.553 down  |
| LMO1840 | 6.091 down  |
| LMO1841 | 14.665 down |
| LMO1842 | 5.957 down  |
| LMO1843 | 2.729 down  |
| LMO1844 | 5.330 down  |
| LMO1845 | 2.926 down  |
| LMO1846 | 2.588 down  |
| LMO1847 | 4.733 down  |
| LMO1848 | 2.933 down  |
| LMO1849 | 2.237 down  |
| LMO1850 | 7.312 down  |
| LMO1851 | 9.071 down  |

|         |             |
|---------|-------------|
| LMO1852 | 3.679 down  |
| LMO1853 | 3.292 down  |
| LMO1854 | 5.851 down  |
| LMO1855 | 3.636 down  |
| LMO1856 | 3.558 down  |
| LMO1857 | 3.479 down  |
| LMO1858 | 3.183 down  |
| LMO1859 | 2.162 down  |
| LMO1861 | 3.575 down  |
| LMO1862 | 3.052 down  |
| LMO1863 | 4.431 down  |
| LMO1864 | 27.422 down |
| LMO1865 | 16.234 down |
| LMO1866 | 11.662 down |
| LMO1867 | 4.066 down  |
| LMO1868 | 4.553 down  |
| LMO1869 | 9.463 down  |
| LMO1870 | 36.108 down |
| LMO1871 | 9.571 down  |
| LMO1872 | 8.012 down  |
| LMO1873 | 3.970 down  |
| LMO1874 | 3.349 down  |
| LMO1875 | 5.928 down  |
| LMO1876 | 6.439 down  |
| LMO1877 | 2.168 down  |
| LMO1878 | 14.482 down |
| LMO1880 | 16.149 down |
| LMO1881 | 3.453 down  |
| LMO1882 | 3.178 down  |
| LMO1883 | 6.959 up    |
| LMO1884 | 7.956 down  |
| LMO1885 | 2.298 down  |
| LMO1886 | 7.740 down  |
| LMO1887 | 10.909 down |
| LMO1888 | 3.175 down  |
| LMO1889 | 6.889 down  |
| LMO1890 | 11.286 down |
| LMO1891 | 9.310 down  |
| LMO1892 | 6.083 down  |
| LMO1893 | 3.266 down  |
| LMO1894 | 3.864 down  |
| LMO1895 | 2.978 down  |
| LMO1896 | 4.921 down  |
| LMO1897 | 3.732 down  |
| LMO1898 | 4.899 down  |
| LMO1899 | 4.900 down  |
| LMO1900 | 4.908 down  |
| LMO1901 | 2.609 down  |



|         |             |
|---------|-------------|
| LMO1902 | 7.741 down  |
| LMO1903 | 77.354 down |
| LMO1904 | 5.225 down  |
| LMO1906 | 6.296 down  |
| LMO1907 | 5.864 down  |
| LMO1909 | 8.784 down  |
| LMO1910 | 52.433 down |
| LMO1911 | 49.539 down |
| LMO1912 | 7.473 down  |
| LMO1913 | 3.257 down  |
| LMO1914 | 6.107 down  |
| LMO1915 | 18.248 down |
| LMO1916 | 7.139 down  |
| LMO1917 | 2.052 down  |
| LMO1918 | 10.933 down |
| LMO1919 | 7.136 down  |
| LMO1920 | 9.561 down  |
| LMO1921 | 6.070 down  |
| LMO1923 | 4.109 down  |
| LMO1924 | 3.871 down  |
| LMO1925 | 8.376 down  |
| LMO1926 | 21.257 down |
| LMO1927 | 4.676 down  |
| LMO1928 | 4.783 down  |
| LMO1929 | 6.836 down  |
| LMO1930 | 20.285 down |
| LMO1931 | 6.702 down  |
| LMO1932 | 12.698 down |
| LMO1933 | 11.564 down |
| LMO1934 | 3.194 down  |
| LMO1935 | 10.574 down |
| LMO1936 | 4.945 down  |
| LMO1937 | 5.792 down  |
| LMO1938 | 3.185 down  |
| LMO1939 | 5.851 down  |
| LMO1940 | 6.786 down  |
| LMO1941 | 7.361 down  |
| LMO1942 | 3.545 down  |
| LMO1943 | 2.488 down  |
| LMO1944 | 6.301 down  |
| LMO1946 | 8.241 down  |
| LMO1947 | 7.686 down  |
| LMO1948 | 3.762 down  |
| LMO1949 | 5.960 down  |
| LMO1950 | 6.308 down  |
| LMO1951 | 7.757 down  |
| LMO1952 | 5.432 down  |
| LMO1955 | 2.629 down  |

|         |             |
|---------|-------------|
| LMO1956 | 2.729 down  |
| LMO1957 | 15.623 down |
| LMO1958 | 10.826 down |
| LMO1959 | 9.249 down  |
| LMO1960 | 7.457 down  |
| LMO1961 | 4.478 down  |
| LMO1963 | 2.109 down  |
| LMO1965 | 10.839 down |
| LMO1968 | 2.253 down  |
| LMO1969 | 2.886 down  |
| LMO1970 | 2.924 down  |
| LMO1971 | 5.141 down  |
| LMO1972 | 2.392 down  |
| LMO1973 | 3.562 down  |
| LMO1974 | 5.697 down  |
| LMO1976 | 4.505 down  |
| LMO1977 | 25.796 down |
| LMO1978 | 13.176 down |
| LMO1979 | 8.251 down  |
| LMO1980 | 7.422 down  |
| LMO1981 | 9.935 down  |
| LMO1982 | 34.425 down |
| LMO1983 | 4.276 down  |
| LMO1993 | 3.214 down  |
| LMO1994 | 18.969 down |
| LMO1995 | 3.623 down  |
| LMO1996 | 8.918 down  |
| LMO2000 | 5.273 up    |
| LMO2002 | 3.140 up    |
| LMO2005 | 3.789 down  |
| LMO2007 | 2.896 down  |
| LMO2008 | 7.836 down  |
| LMO2009 | 12.166 down |
| LMO2010 | 8.330 down  |
| LMO2011 | 4.569 down  |
| LMO2012 | 6.193 down  |
| LMO2013 | 3.268 down  |
| LMO2014 | 2.100 down  |
| LMO2015 | 16.274 down |
| LMO2016 | 3.527 down  |
| LMO2017 | 6.674 down  |
| LMO2018 | 4.638 down  |
| LMO2019 | 4.605 down  |
| LMO2020 | 6.129 down  |
| LMO2021 | 15.260 down |
| LMO2023 | 2.693 down  |
| LMO2028 | 7.269 down  |
| LMO2029 | 3.514 down  |

|         |             |
|---------|-------------|
| LMO2030 | 3.781 down  |
| LMO2031 | 2.539 down  |
| LMO2032 | 3.015 down  |
| LMO2033 | 6.201 down  |
| LMO2034 | 6.492 down  |
| LMO2035 | 7.081 down  |
| LMO2036 | 2.154 down  |
| LMO2037 | 7.267 down  |
| LMO2038 | 10.718 down |
| LMO2039 | 2.619 down  |
| LMO2040 | 66.299 down |
| LMO2041 | 18.367 down |
| LMO2042 | 24.103 down |
| LMO2043 | 3.319 down  |
| LMO2044 | 9.320 down  |
| LMO2045 | 13.642 down |
| LMO2046 | 11.264 down |
| LMO2047 | 4.083 down  |
| LMO2048 | 11.670 down |
| LMO2049 | 3.156 down  |
| LMO2050 | 2.622 up    |
| LMO2051 | 11.361 down |
| LMO2052 | 10.457 down |
| LMO2053 | 12.754 down |
| LMO2054 | 5.634 down  |
| LMO2055 | 2.734 down  |
| LMO2056 | 7.950 down  |
| LMO2057 | 5.138 down  |
| LMO2058 | 24.972 down |
| LMO2059 | 6.969 down  |
| LMO2060 | 11.962 down |
| LMO2061 | 10.158 down |
| LMO2062 | 29.505 down |
| LMO2063 | 9.136 down  |
| LMO2064 | 6.010 down  |
| LMO2067 | 2.048 down  |
| LMO2070 | 7.941 down  |
| LMO2071 | 6.743 down  |
| LMO2072 | 3.649 down  |
| LMO2073 | 13.491 down |
| LMO2074 | 10.914 down |
| LMO2075 | 3.606 down  |
| LMO2076 | 4.154 down  |
| LMO2077 | 4.855 down  |
| LMO2078 | 6.536 down  |
| LMO2079 | 25.732 down |
| LMO2080 | 9.367 down  |
| LMO2081 | 5.149 down  |

|         |             |
|---------|-------------|
| LMO2082 | 7.246 down  |
| LMO2083 | 4.093 down  |
| LMO2084 | 3.587 down  |
| LMO2086 | 7.088 down  |
| LMO2087 | 5.072 down  |
| LMO2088 | 5.049 down  |
| LMO2090 | 2.002 up    |
| LMO2092 | 6.269 down  |
| LMO2094 | 4.054 down  |
| LMO2095 | 2.541 down  |
| LMO2096 | 15.552 down |
| LMO2097 | 4.027 down  |
| LMO2098 | 2.507 down  |
| LMO2100 | 14.901 down |
| LMO2102 | 4.000 down  |
| LMO2103 | 5.135 down  |
| LMO2104 | 10.061 down |
| LMO2105 | 17.012 down |
| LMO2106 | 6.911 down  |
| LMO2107 | 6.995 down  |
| LMO2108 | 3.945 down  |
| LMO2109 | 9.914 down  |
| LMO2110 | 3.376 down  |
| LMO2111 | 9.799 down  |
| LMO2112 | 11.782 down |
| LMO2113 | 6.078 down  |
| LMO2114 | 5.238 down  |
| LMO2115 | 7.275 down  |
| LMO2116 | 74.067 down |
| LMO2117 | 6.219 down  |
| LMO2118 | 7.937 down  |
| LMO2119 | 3.139 down  |
| LMO2120 | 2.830 down  |
| LMO2121 | 5.729 up    |
| LMO2122 | 9.095 up    |
| LMO2123 | 5.043 up    |
| LMO2125 | 8.268 up    |
| LMO2127 | 11.794 down |
| LMO2128 | 6.377 down  |
| LMO2129 | 8.502 down  |
| LMO2130 | 2.076 down  |
| LMO2131 | 4.258 down  |
| LMO2133 | 4.509 down  |
| LMO2139 | 4.580 down  |
| LMO2140 | 5.039 down  |
| LMO2141 | 4.331 down  |
| LMO2142 | 3.320 down  |
| LMO2143 | 7.915 down  |

|         |             |
|---------|-------------|
| LMO2144 | 7.520 down  |
| LMO2145 | 2.184 down  |
| LMO2148 | 3.428 down  |
| LMO2149 | 2.587 down  |
| LMO2155 | 2.000 up    |
| LMO2156 | 20.629 down |
| LMO2163 | 2.320 up    |
| LMO2164 | 9.537 down  |
| LMO2165 | 4.218 down  |
| LMO2166 | 12.117 down |
| LMO2167 | 7.248 down  |
| LMO2168 | 4.683 down  |
| LMO2169 | 5.234 down  |
| LMO2172 | 2.425 up    |
| LMO2173 | 3.103 down  |
| LMO2174 | 8.287 down  |
| LMO2175 | 3.096 up    |
| LMO2176 | 9.060 down  |
| LMO2177 | 5.232 down  |
| LMO2178 | 5.607 down  |
| LMO2179 | 6.506 down  |
| LMO2181 | 2.536 down  |
| LMO2184 | 2.852 down  |
| LMO2187 | 5.187 down  |
| LMO2188 | 3.848 down  |
| LMO2189 | 3.909 down  |
| LMO2191 | 3.511 down  |
| LMO2192 | 3.443 down  |
| LMO2193 | 2.978 down  |
| LMO2194 | 3.381 down  |
| LMO2195 | 3.816 down  |
| LMO2196 | 2.026 down  |
| LMO2197 | 12.462 down |
| LMO2198 | 3.217 down  |
| LMO2200 | 4.695 down  |
| LMO2201 | 2.994 down  |
| LMO2202 | 6.465 down  |
| LMO2203 | 4.164 down  |
| LMO2204 | 2.012 down  |
| LMO2207 | 9.128 down  |
| LMO2208 | 9.220 down  |
| LMO2209 | 8.714 down  |
| LMO2211 | 8.799 down  |
| LMO2212 | 7.544 down  |
| LMO2214 | 6.789 down  |
| LMO2215 | 5.294 down  |
| LMO2216 | 4.072 down  |
| LMO2217 | 5.005 down  |

|         |             |
|---------|-------------|
| LMO2218 | 13.435 down |
| LMO2219 | 4.191 down  |
| LMO2221 | 2.043 down  |
| LMO2222 | 2.417 down  |
| LMO2223 | 9.006 down  |
| LMO2224 | 5.637 down  |
| LMO2225 | 8.723 down  |
| LMO2226 | 4.678 down  |
| LMO2227 | 3.055 down  |
| LMO2229 | 6.904 down  |
| LMO2231 | 2.740 down  |
| LMO2232 | 2.571 down  |
| LMO2233 | 8.105 down  |
| LMO2234 | 2.046 down  |
| LMO2236 | 6.161 down  |
| LMO2237 | 3.745 down  |
| LMO2238 | 4.032 down  |
| LMO2239 | 19.657 down |
| LMO2240 | 29.306 down |
| LMO2241 | 55.059 down |
| LMO2242 | 4.515 down  |
| LMO2243 | 9.681 down  |
| LMO2244 | 6.672 down  |
| LMO2245 | 5.069 down  |
| LMO2246 | 4.557 down  |
| LMO2247 | 3.754 down  |
| LMO2248 | 4.550 down  |
| LMO2249 | 2.503 down  |
| LMO2250 | 3.081 down  |
| LMO2252 | 19.473 down |
| LMO2253 | 5.846 down  |
| LMO2254 | 14.388 down |
| LMO2255 | 5.208 down  |
| LMO2257 | 7.581 up    |
| LMO2259 | 19.115 down |
| LMO2260 | 7.092 down  |
| LMO2261 | 4.407 down  |
| LMO2262 | 7.118 down  |
| LMO2263 | 4.023 down  |
| LMO2264 | 2.035 down  |
| LMO2265 | 2.210 down  |
| LMO2267 | 2.196 down  |
| LMO2277 | 3.877 down  |
| LMO2278 | 2.354 up    |
| LMO2279 | 3.079 up    |
| LMO2280 | 2.493 up    |
| LMO2281 | 3.109 up    |
| LMO2282 | 3.159 up    |

|         |             |
|---------|-------------|
| LMO2283 | 2.322 up    |
| LMO2284 | 3.364 up    |
| LMO2285 | 3.541 up    |
| LMO2286 | 3.804 up    |
| LMO2287 | 3.466 up    |
| LMO2288 | 3.980 up    |
| LMO2289 | 2.785 up    |
| LMO2290 | 2.748 up    |
| LMO2291 | 2.414 up    |
| LMO2292 | 2.853 up    |
| LMO2293 | 3.216 up    |
| LMO2294 | 3.404 up    |
| LMO2295 | 2.270 up    |
| LMO2296 | 2.127 up    |
| LMO2297 | 2.489 up    |
| LMO2298 | 2.943 up    |
| LMO2299 | 4.314 up    |
| LMO2300 | 3.554 up    |
| LMO2301 | 2.015 up    |
| LMO2303 | 2.275 up    |
| LMO2306 | 2.540 up    |
| LMO2307 | 2.065 up    |
| LMO2309 | 2.140 up    |
| LMO2311 | 2.625 up    |
| LMO2313 | 2.142 up    |
| LMO2314 | 3.404 up    |
| LMO2315 | 2.089 up    |
| LMO2316 | 2.224 up    |
| LMO2317 | 2.071 up    |
| LMO2319 | 2.195 up    |
| LMO2322 | 2.287 up    |
| LMO2326 | 3.801 up    |
| LMO2327 | 3.507 up    |
| LMO2329 | 9.300 down  |
| LMO2330 | 2.272 down  |
| LMO2334 | 47.450 down |
| LMO2335 | 2.738 down  |
| LMO2337 | 3.447 down  |
| LMO2339 | 2.885 down  |
| LMO2342 | 4.614 down  |
| LMO2343 | 3.375 down  |
| LMO2344 | 4.442 down  |
| LMO2345 | 4.899 down  |
| LMO2346 | 4.752 down  |
| LMO2347 | 7.246 down  |
| LMO2348 | 7.182 down  |
| LMO2349 | 7.918 down  |
| LMO2350 | 7.627 down  |

|         |             |
|---------|-------------|
| LMO2351 | 14.477 down |
| LMO2352 | 45.074 down |
| LMO2353 | 3.902 down  |
| LMO2354 | 4.337 down  |
| LMO2355 | 4.910 down  |
| LMO2358 | 2.522 down  |
| LMO2359 | 4.038 down  |
| LMO2360 | 3.297 down  |
| LMO2361 | 5.701 down  |
| LMO2362 | 2.267 down  |
| LMO2363 | 2.586 down  |
| LMO2364 | 2.526 down  |
| LMO2365 | 3.616 down  |
| LMO2366 | 10.625 down |
| LMO2368 | 3.932 down  |
| LMO2369 | 5.827 down  |
| LMO2371 | 7.968 down  |
| LMO2372 | 5.919 down  |
| LMO2374 | 10.618 down |
| LMO2375 | 9.614 down  |
| LMO2376 | 3.868 down  |
| LMO2377 | 14.377 down |
| LMO2378 | 7.210 down  |
| LMO2379 | 7.110 down  |
| LMO2380 | 5.073 down  |
| LMO2381 | 5.551 down  |
| LMO2382 | 2.936 down  |
| LMO2383 | 3.702 down  |
| LMO2384 | 4.880 down  |
| LMO2385 | 3.898 down  |
| LMO2386 | 4.031 down  |
| LMO2387 | 3.014 down  |
| LMO2388 | 5.147 down  |
| LMO2389 | 2.111 down  |
| LMO2390 | 3.057 down  |
| LMO2392 | 5.588 down  |
| LMO2393 | 3.716 down  |
| LMO2395 | 7.708 down  |
| LMO2396 | 3.611 down  |
| LMO2397 | 13.294 down |
| LMO2399 | 4.088 down  |
| LMO2400 | 6.192 down  |
| LMO2401 | 3.350 down  |
| LMO2402 | 3.189 down  |
| LMO2403 | 4.961 down  |
| LMO2404 | 3.031 down  |
| LMO2405 | 4.254 down  |
| LMO2407 | 3.824 down  |



|         |             |
|---------|-------------|
| LMO2408 | 16.924 down |
| LMO2409 | 42.966 down |
| LMO2410 | 6.851 down  |
| LMO2411 | 6.136 down  |
| LMO2416 | 16.540 down |
| LMO2417 | 8.764 down  |
| LMO2418 | 9.693 down  |
| LMO2419 | 5.625 down  |
| LMO2420 | 4.253 down  |
| LMO2421 | 3.049 down  |
| LMO2422 | 3.966 down  |
| LMO2423 | 7.055 down  |
| LMO2424 | 9.364 down  |
| LMO2425 | 3.855 down  |
| LMO2427 | 5.308 down  |
| LMO2428 | 11.287 down |
| LMO2429 | 3.391 down  |
| LMO2430 | 2.803 down  |
| LMO2431 | 4.581 down  |
| LMO2433 | 8.290 down  |
| LMO2435 | 10.246 down |
| LMO2436 | 2.254 down  |
| LMO2437 | 2.236 down  |
| LMO2438 | 4.064 down  |
| LMO2439 | 8.006 down  |
| LMO2440 | 4.484 down  |
| LMO2441 | 8.881 down  |
| LMO2442 | 6.311 down  |
| LMO2443 | 7.960 down  |
| LMO2444 | 3.203 down  |
| LMO2447 | 2.077 down  |
| LMO2448 | 3.538 down  |
| LMO2450 | 3.847 down  |
| LMO2451 | 4.586 down  |
| LMO2452 | 2.162 down  |
| LMO2454 | 5.194 up    |
| LMO2460 | 3.887 down  |
| LMO2461 | 4.193 down  |
| LMO2462 | 2.048 down  |
| LMO2463 | 3.712 down  |
| LMO2464 | 18.164 down |
| LMO2465 | 12.400 down |
| LMO2466 | 16.876 down |
| LMO2467 | 5.974 down  |
| LMO2468 | 2.381 down  |
| LMO2469 | 6.557 down  |
| LMO2472 | 3.351 down  |
| LMO2473 | 3.454 down  |

|         |             |
|---------|-------------|
| LMO2474 | 2.842 down  |
| LMO2475 | 7.829 down  |
| LMO2476 | 4.580 down  |
| LMO2477 | 6.185 down  |
| LMO2478 | 5.839 down  |
| LMO2479 | 2.128 down  |
| LMO2480 | 5.026 down  |
| LMO2481 | 2.501 down  |
| LMO2482 | 5.970 down  |
| LMO2483 | 4.173 down  |
| LMO2487 | 2.409 up    |
| LMO2488 | 2.071 down  |
| LMO2490 | 4.158 down  |
| LMO2491 | 6.000 down  |
| LMO2492 | 5.745 down  |
| LMO2493 | 9.130 down  |
| LMO2494 | 2.912 down  |
| LMO2495 | 2.739 down  |
| LMO2496 | 2.622 down  |
| LMO2497 | 2.647 down  |
| LMO2498 | 3.642 down  |
| LMO2499 | 3.317 down  |
| LMO2500 | 11.859 down |
| LMO2501 | 7.286 down  |
| LMO2502 | 8.629 down  |
| LMO2503 | 4.800 down  |
| LMO2504 | 14.040 down |
| LMO2505 | 10.045 down |
| LMO2506 | 5.700 down  |
| LMO2507 | 4.567 down  |
| LMO2508 | 2.489 down  |
| LMO2509 | 5.126 down  |
| LMO2510 | 3.748 down  |
| LMO2512 | 9.738 down  |
| LMO2513 | 7.393 down  |
| LMO2514 | 3.121 down  |
| LMO2515 | 2.646 down  |
| LMO2516 | 12.981 down |
| LMO2517 | 9.892 down  |
| LMO2518 | 6.724 down  |
| LMO2519 | 6.309 down  |
| LMO2520 | 6.040 down  |
| LMO2521 | 12.340 down |
| LMO2522 | 4.657 down  |
| LMO2524 | 4.866 down  |
| LMO2525 | 4.941 down  |
| LMO2526 | 7.128 down  |
| LMO2527 | 9.734 down  |

|         |             |
|---------|-------------|
| LMO2535 | 2.581 down  |
| LMO2536 | 3.811 down  |
| LMO2537 | 11.643 down |
| LMO2538 | 2.688 down  |
| LMO2539 | 2.559 down  |
| LMO2540 | 5.863 down  |
| LMO2541 | 3.243 down  |
| LMO2542 | 2.997 down  |
| LMO2543 | 4.262 down  |
| LMO2544 | 3.763 down  |
| LMO2545 | 11.685 down |
| LMO2546 | 6.006 down  |
| LMO2547 | 21.543 down |
| LMO2548 | 2.241 down  |
| LMO2549 | 9.284 down  |
| LMO2550 | 6.952 down  |
| LMO2551 | 6.829 down  |
| LMO2552 | 5.416 down  |
| LMO2553 | 4.530 down  |
| LMO2554 | 4.995 down  |
| LMO2555 | 2.744 down  |
| LMO2557 | 9.205 down  |
| LMO2558 | 5.723 down  |
| LMO2559 | 7.896 down  |
| LMO2560 | 3.257 down  |
| LMO2561 | 4.624 down  |
| LMO2562 | 11.772 down |
| LMO2563 | 34.952 down |
| LMO2565 | 4.658 down  |
| LMO2566 | 6.731 down  |
| LMO2567 | 4.788 up    |
| LMO2569 | 8.215 down  |
| LMO2570 | 2.515 down  |
| LMO2575 | 3.179 down  |
| LMO2577 | 7.356 down  |
| LMO2578 | 3.848 down  |
| LMO2579 | 4.617 down  |
| LMO2580 | 5.660 down  |
| LMO2581 | 3.398 down  |
| LMO2582 | 6.089 down  |
| LMO2583 | 3.497 down  |
| LMO2585 | 5.771 up    |
| LMO2586 | 6.222 up    |
| LMO2587 | 18.147 down |
| LMO2590 | 2.637 down  |
| LMO2591 | 2.790 down  |
| LMO2594 | 3.032 down  |
| LMO2595 | 3.918 down  |

|         |             |
|---------|-------------|
| LMO2596 | 5.217 down  |
| LMO2598 | 3.073 down  |
| LMO2599 | 3.696 down  |
| LMO2600 | 3.454 down  |
| LMO2601 | 4.679 down  |
| LMO2603 | 2.805 down  |
| LMO2604 | 3.252 down  |
| LMO2605 | 3.303 down  |
| LMO2610 | 5.366 down  |
| LMO2634 | 3.318 down  |
| LMO2635 | 3.143 down  |
| LMO2636 | 3.039 down  |
| LMO2637 | 4.575 down  |
| LMO2639 | 4.455 down  |
| LMO2640 | 3.753 down  |
| LMO2641 | 3.088 down  |
| LMO2642 | 2.126 down  |
| LMO2643 | 7.569 down  |
| LMO2644 | 5.146 down  |
| LMO2645 | 98.664 up   |
| LMO2646 | 48.757 up   |
| LMO2647 | 50.049 up   |
| LMO2648 | 50.803 up   |
| LMO2649 | 28.152 up   |
| LMO2650 | 13.512 up   |
| LMO2651 | 13.487 up   |
| LMO2654 | 2.203 up    |
| LMO2658 | 5.345 down  |
| LMO2659 | 2.349 up    |
| LMO2660 | 3.527 up    |
| LMO2661 | 8.397 up    |
| LMO2662 | 11.375 up   |
| LMO2663 | 16.199 up   |
| LMO2664 | 9.926 up    |
| LMO2665 | 9.916 up    |
| LMO2666 | 7.420 up    |
| LMO2667 | 5.991 up    |
| LMO2668 | 5.401 up    |
| LMO2669 | 2.528 down  |
| LMO2673 | 2.315 up    |
| LMO2674 | 2.134 up    |
| LMO2676 | 2.144 up    |
| LMO2681 | 2.287 up    |
| LMO2683 | 5.156 up    |
| LMO2684 | 5.738 up    |
| LMO2685 | 8.777 up    |
| LMO2686 | 13.586 down |
| LMO2687 | 8.929 down  |

|         |             |
|---------|-------------|
| LMO2688 | 8.828 down  |
| LMO2689 | 11.286 down |
| LMO2690 | 69.169 down |
| LMO2692 | 2.815 down  |
| LMO2693 | 2.053 down  |
| LMO2694 | 3.428 down  |
| LMO2696 | 2.062 up    |
| LMO2698 | 2.340 down  |
| LMO2700 | 2.283 down  |
| LMO2701 | 2.462 down  |
| LMO2702 | 2.146 down  |
| LMO2703 | 3.572 down  |
| LMO2704 | 2.027 down  |
| LMO2705 | 2.896 down  |
| LMO2707 | 2.698 down  |
| LMO2708 | 11.343 up   |
| LMO2710 | 11.428 down |
| LMO2712 | 2.042 down  |
| LMO2714 | 2.063 up    |
| LMO2715 | 2.509 down  |
| LMO2716 | 2.202 down  |
| LMO2717 | 2.161 down  |
| LMO2719 | 9.930 down  |
| LMO2720 | 32.501 down |
| LMO2721 | 2.622 down  |
| LMO2722 | 3.922 down  |
| LMO2723 | 4.472 down  |
| LMO2725 | 3.485 down  |
| LMO2726 | 9.110 down  |
| LMO2727 | 4.416 down  |
| LMO2728 | 4.860 down  |
| LMO2729 | 5.227 down  |
| LMO2732 | 2.550 down  |
| LMO2734 | 5.075 up    |
| LMO2735 | 2.931 up    |
| LMO2737 | 15.470 down |
| LMO2738 | 6.382 down  |
| LMO2741 | 2.408 down  |
| LMO2742 | 2.095 up    |
| LMO2744 | 9.723 down  |
| LMO2745 | 2.083 down  |
| LMO2746 | 3.950 down  |
| LMO2747 | 6.898 down  |
| LMO2749 | 18.432 down |
| LMO2750 | 6.550 down  |
| LMO2753 | 13.547 down |
| LMO2754 | 13.990 down |
| LMO2755 | 3.099 down  |

|         |             |
|---------|-------------|
| LMO2756 | 7.856 down  |
| LMO2757 | 3.688 down  |
| LMO2759 | 3.028 down  |
| LMO2760 | 3.365 down  |
| LMO2761 | 11.619 down |
| LMO2762 | 5.415 down  |
| LMO2763 | 3.653 down  |
| LMO2764 | 3.159 down  |
| LMO2765 | 2.400 down  |
| LMO2766 | 13.240 down |
| LMO2767 | 7.310 down  |
| LMO2768 | 52.959 down |
| LMO2769 | 16.548 down |
| LMO2770 | 5.747 down  |
| LMO2773 | 2.665 down  |
| LMO2774 | 4.123 down  |
| LMO2775 | 2.098 down  |
| LMO2777 | 8.584 down  |
| LMO2779 | 7.360 down  |
| LMO2781 | 9.731 up    |
| LMO2782 | 7.112 up    |
| LMO2783 | 3.871 up    |
| LMO2784 | 3.587 down  |
| LMO2785 | 3.124 down  |
| LMO2786 | 6.607 down  |
| LMO2787 | 7.947 down  |
| LMO2788 | 5.211 down  |
| LMO2789 | 8.531 down  |
| LMO2790 | 5.573 down  |
| LMO2791 | 8.196 down  |
| LMO2793 | 46.304 down |
| LMO2794 | 7.076 down  |
| LMO2795 | 6.817 down  |
| LMO2797 | 2.233 down  |
| LMO2799 | 4.085 up    |
| LMO2801 | 3.084 up    |
| LMO2802 | 7.367 down  |
| LMO2803 | 13.163 down |
| LMO2804 | 5.132 down  |
| LMO2805 | 7.071 down  |
| LMO2806 | 3.873 down  |
| LMO2810 | 17.823 down |
| LMO2811 | 10.200 down |
| LMO2814 | 5.188 down  |
| LMO2815 | 2.469 down  |
| LMO2816 | 2.895 up    |
| LMO2818 | 2.100 up    |
| LMO2820 | 8.452 down  |

|         |             |
|---------|-------------|
| LMO2821 | 53.309 down |
| LMO2822 | 3.519 down  |
| LMO2823 | 5.359 down  |
| LMO2825 | 4.271 down  |
| LMO2826 | 7.775 down  |
| LMO2827 | 6.726 down  |
| LMO2829 | 9.362 down  |
| LMO2830 | 6.849 down  |
| LMO2831 | 7.248 down  |
| LMO2832 | 3.963 down  |
| LMO2833 | 5.556 down  |
| LMO2834 | 2.012 down  |
| LMO2835 | 2.315 down  |
| LMO2839 | 2.904 down  |
| LMO2841 | 5.786 down  |
| LMO2842 | 10.361 down |
| LMO2843 | 14.173 down |
| LMO2844 | 12.083 down |
| LMO2845 | 7.944 down  |
| LMO2846 | 2.508 up    |
| LMO2849 | 3.926 up    |
| LMO2850 | 2.694 up    |
| LMO2852 | 7.536 down  |
| LMO2853 | 5.491 down  |
| LMO2854 | 8.342 down  |
| LMO2855 | 10.463 down |
| LMO2856 | 33.757 down |
