# Supplementary material for: Changes in Gene Expression during Adaptation of Listeria monocytogenes to the Soil Environment
Source: PubMed Central journal article supplement (PMC3179493; doi:10.1371/journal.pone.0024881), 2011-09-23
Supplement: pone.0024881.s004.pdf [file pone.0024881.s004.pdf]

Table S4. Gene ontology « functional categories » 15 minutes

| gene name      | description                                                                       | category | fold change |
|----------------|-----------------------------------------------------------------------------------|----------|-------------|
| <i>lmo2818</i> | similar to transmembrane efflux protein                                           | 1.2      | 5.167 up    |
| <i>lmo2171</i> | similar to antiporter proteins                                                    | 1.2      | 5.184 up    |
| <i>lmo2850</i> | similar to sugar transport proteins                                               | 1.2      | 16.839 up   |
| <i>lmo2816</i> | similar to transport protein                                                      | 1.2      | 15.953 up   |
| <i>lmo2799</i> | similar to phosphotransferase system mannitol-specific enzyme IIBC                | 1.2      | 3.864 up    |
| <i>lmo2783</i> | similar to cellobiose phosphotransferase system enzyme IIC                        | 1.2      | 18.995 up   |
| <i>lmo2782</i> | similar to PTS. cellobiose-specific IIB component                                 | 1.2      | 27.191 up   |
| <i>lmo2780</i> | similar to cellobiose PTS enzyme IIA                                              | 1.2      | 3.774 up    |
| <i>lmo2772</i> | similar to beta-glucoside-specific enzyme IIABC                                   | 1.2      | 4.708 up    |
| <i>lmo2733</i> | similar to PTS system. fructose-specific IIABC component                          | 1.2      | 4.733 up    |
| <i>lmo2708</i> | similar to PTS system. cellobiose-specific enzyme IIC                             | 1.2      | 20.466 up   |
| <i>lmo2685</i> | similar to cellobiose phosphotransferase enzyme IIA component                     | 1.2      | 11.418 up   |
| <i>lmo2684</i> | similar to cellobiose phosphotransferase enzyme IIC component                     | 1.2      | 8.427 up    |
| <i>lmo2683</i> | similar to cellobiose phosphotransferase enzyme IIB component                     | 1.2      | 8.343 up    |
| <i>lmo2666</i> | similar to PTS system galactitol-specific enzyme IIB component                    | 1.2      | 15.747 up   |
| <i>lmo2665</i> | similar to PTS system galactitol-specific enzyme IIC component                    | 1.2      | 14.893 up   |
| <i>lmo2650</i> | similar to hypothetical PTS enzyme IIB component                                  | 1.2      | 26.143 up   |
| <i>lmo2136</i> | similar to PTS system. fructose-specific enzyme IIB component                     | 1.2      | 5.115 up    |
| <i>lmo2135</i> | similar to PTS system. fructose-specific enzyme IIC component                     | 1.2      | 2.749 up    |
| <i>lmo2125</i> | similar to maltose/maltodextrin ABC-transporter (binding protein)                 | 1.2      | 12.023 up   |
| <i>lmo2124</i> | similar to maltodextrin ABC-transport system (permease)                           | 1.2      | 10.151 up   |
| <i>lmo2123</i> | similar to maltodextrin ABC-transport system (permease)                           | 1.2      | 11.361 up   |
| <i>lmo2002</i> | similar to PTS mannose-specific enzyme IIB component                              | 1.2      | 8.015 up    |
| <i>lmo2001</i> | similar to PTS mannose-specific enzyme IIC component                              | 1.2      | 6.605 up    |
| <i>lmo2000</i> | similar to PTS mannose-specific enzyme IID component                              | 1.2      | 10.236 up   |
| <i>lmo1997</i> | similar to PTS mannose-specific enzyme IIA component                              | 1.2      | 5.834 up    |
| <i>lmo1732</i> | similar to sugar ABC transporter. permease protein                                | 1.2      | 2.885 up    |
| <i>lmo1731</i> | similar to sugar ABC transporter. permease protein                                | 1.2      | 5.217 up    |
| <i>lmo1730</i> | similar to sugar ABC transporter binding protein                                  | 1.2      | 11.181 up   |
| <i>lmo1720</i> | similar to phosphotransferase system (PTS) lichenan-specific enzyme IIB component | 1.2      | 5.168 up    |
| <i>lmo1719</i> | similar to phosphotransferase system (PTS) lichenan-specific enzyme IIA component | 1.2      | 5.354 up    |
| <i>lmo0916</i> | similar to phosphotransferase system enzyme IIA                                   | 1.2      | 35.521 up   |
| <i>lmo0915</i> | similar to phosphotransferase system enzyme IIC                                   | 1.2      | 21.540 up   |
| <i>lmo0914</i> | similar to PTS system. IIB component                                              | 1.2      | 23.186 up   |
| <i>lmo0876</i> | similar to PTS system. Lichenan-specific enzyme IIC component                     | 1.2      | 3.433 up    |
| <i>lmo0875</i> | similar to PTS system. beta-glucoside enzyme IIB component                        | 1.2      | 4.492 up    |
| <i>lmo0874</i> | similar to PTS system enzyme IIA component                                        | 1.2      | 4.725 up    |
| <i>lmo0781</i> | similar to mannose-specific phosphotransferase system (PTS) component IID         | 1.2      | 2.470 up    |
| <i>lmo0633</i> | similar to PTS system. fructose-specific IIB component                            | 1.2      | 3.209 up    |
| <i>lmo0632</i> | similar to PTS system. fructose-specific IIC component                            | 1.2      | 4.421 up    |
| <i>lmo0544</i> | similar to PTS system. glucitol/sorbitol-specific enzyme II CII component         | 1.2      | 14.110 up   |
| <i>lmo0543</i> | similar to PTS system. glucitol/sorbitol-specific enzyme IIBC component           | 1.2      | 3.289 up    |
| <i>lmo0400</i> | similar to fructose-specific phosphotransferase enzyme IIC                        | 1.2      | 6.875 up    |
| <i>lmo0399</i> | similar to fructose-specific phosphotransferase enzyme IIB                        | 1.2      | 3.859 up    |
| <i>lmo0301</i> | similar to PTS beta-glucoside-specific enzyme IIA component                       | 1.2      | 17.073 up   |
| <i>lmo0299</i> | similar to PTS beta-glucoside-specific enzyme IIB component                       | 1.2      | 13.398 up   |

|                |                                                                              |       |           |
|----------------|------------------------------------------------------------------------------|-------|-----------|
| <i>lmo0298</i> | similar to PTS beta-glucoside-specific enzyme IIC component                  | 1.2   | 13.358 up |
| <i>lmo0278</i> | similar to sugar ABC transporter. ATP-binding protein                        | 1.2   | 3.867 up  |
| <i>lmo0181</i> | similar to sugar ABC transporter. sugar-binding protein                      | 1.2   | 2.024 up  |
| <i>lmo0027</i> | similar to PTS system. beta-glucosides specific enzyme IIABC                 | 1.2   | 18.344 up |
| <i>lmo0024</i> | similar to PTS system. mannose-specific IID component                        | 1.2   | 19.291 up |
| <i>lmo0023</i> | similar to PTS system. fructose-specific IIC component                       | 1.2   | 15.139 up |
| <i>lmo0022</i> | similar to PTS system. fructose-specific IIB component                       | 1.2   | 19.035 up |
| <i>lmo0021</i> | similar to PTS system. fructose-specific IIA component                       | 1.2   | 11.202 up |
| <i>lmo2667</i> | similar to PTS system galactitol-specific enzyme IIA component               | 1.2   | 6.649 up  |
| <i>lmo2651</i> | similar to mannitol-specific PTS enzyme IIA component                        | 1.2   | 33.435 up |
| <i>lmo2137</i> | similar to PTS system. fructose-specific enzyme IIA component                | 1.2   | 5.052 up  |
| <i>lmo0631</i> | similar to PTS system. fructose-specific IIA component                       | 1.2   | 4.174 up  |
| <i>lmo0503</i> | similar to PTS fructose-specific enzyme IIA component                        | 1.2   | 2.766 up  |
| <i>lmo0398</i> | similar to phosphotransferase system enzyme IIA                              | 1.2   | 4.494 up  |
| <i>lmo0357</i> | similar to PTS system. enzyme IIA component                                  | 1.2   | 2.209 up  |
| <i>kdpA</i>    | highly similar to potassium-transporting atpase a chain                      | 1.2   | 3.003 up  |
| <i>kdpB</i>    | potassium-transporting atpase b chain                                        | 1.2   | 2.798 up  |
| <i>lmo2649</i> | similar to hypothetical PTS enzyme IIC component                             | 1.2   | 32.946 up |
| <i>lmo0608</i> | similar to ABC transporter. ATP-binding protein                              | 1.2   | 2.661 up  |
| <i>lmo2584</i> | similar to formate dehydrogenase associated protein                          | 2.1.1 | 3.283 up  |
| <i>lmo1538</i> | similar to glycerol kinase                                                   | 2.1.1 | 3.467 up  |
| <i>glpD</i>    | similar to glycerol 3 phosphate dehydrogenase                                | 2.1.1 | 2.898 up  |
| <i>lmo0878</i> | similar to oxidoreductases                                                   | 2.1.1 | 3.251 up  |
| <i>lmo0383</i> | highly similar to B. subtilis methylmalonate-semialdehyde dehydrogenase IolA | 2.1.1 | 7.233 up  |
| <i>lmo0386</i> | similar to B. subtilis IolD protein. to acetolactate synthase                | 2.1.1 | 3.020 up  |
| <i>lmo2664</i> | similar to sorbitol dehydrogenase                                            | 2.1.1 | 9.634 up  |
| <i>lmo2663</i> | similar to polyol dehydrogenase                                              | 2.1.1 | 9.744 up  |
| <i>lmo2849</i> | similar to rhamnulokinase                                                    | 2.1.1 | 8.746 up  |
| <i>lmo2848</i> | highly similar to L-rhamnose isomerase                                       | 2.1.1 | 7.039 up  |
| <i>lmo2847</i> | highly similar to rhamnulose-1-phosphate aldolase                            | 2.1.1 | 3.324 up  |
| <i>lmo2801</i> | similar to a putative N-acetylmannosamine-6-phosphate epimerase              | 2.1.1 | 9.175 up  |
| <i>lmo2781</i> | similar to beta-glucosidase                                                  | 2.1.1 | 15.760 up |
| <i>lmo2771</i> | similar to beta-glucosidase                                                  | 2.1.1 | 2.043 up  |
| <i>lmo2743</i> | similar to transaldolase                                                     | 2.1.1 | 4.336 up  |
| <i>lmo2735</i> | similar to Sucrose phosphorylase                                             | 2.1.1 | 6.244 up  |
| <i>lmo2734</i> | weakly similar to sugar hydrolase                                            | 2.1.1 | 6.192 up  |
| <i>lmo2674</i> | similar to ribose 5-phosphate epimerase                                      | 2.1.1 | 3.332 up  |
| <i>lmo2662</i> | similar to ribose 5-phosphate epimerase                                      | 2.1.1 | 8.669 up  |
| <i>lmo2661</i> | similar to ribulose-5-phosphate 3-epimerase                                  | 2.1.1 | 8.132 up  |
| <i>lmo2126</i> | similar to maltogenic amylase                                                | 2.1.1 | 2.538 up  |
| <i>lmo2121</i> | similar to maltosephosphorylase                                              | 2.1.1 | 9.319 up  |
| <i>lmo1883</i> | similar to chitinases                                                        | 2.1.1 | 7.157 up  |
| <i>lmo1729</i> | similar to beta-glucosidases                                                 | 2.1.1 | 2.676 up  |
| <i>lmo1254</i> | similar to alpha.alpha-phosphotrehalase                                      | 2.1.1 | 2.167 up  |
| <i>lmo0957</i> | similar to glucosamine-6-Phoasphate isomerase (EC 5.3.1.10)                  | 2.1.1 | 2.650 up  |
| <i>lmo0917</i> | similar to beta-glucosidase                                                  | 2.1.1 | 60.712 up |
| <i>lmo0877</i> | similar to B. subtilis NagB protein (glucosamine-6-phosphate isomerase)      | 2.1.1 | 2.685 up  |
| <i>lmo0643</i> | similar to putative transaldolase                                            | 2.1.1 | 6.213 up  |

|                |                                                                                 |       |           |
|----------------|---------------------------------------------------------------------------------|-------|-----------|
| <i>lmo0634</i> | similar to an E. coli putative tagatose 6-phosphate kinase                      | 2.1.1 | 3.111 up  |
| <i>lmo0536</i> | similar to 6-phospho-beta-glucosidase                                           | 2.1.1 | 5.450 up  |
| <i>lmo0401</i> | highly similar to E. coli YbgG protein. a putative sugar hydrolase              | 2.1.1 | 19.291 up |
| <i>lmo0385</i> | similar to B. subtilis IolC protein and to fructokinase                         | 2.1.1 | 3.668 up  |
| <i>lmo0384</i> | similar to B. subtilis IolB protein                                             | 2.1.1 | 6.414 up  |
| <i>lmo0348</i> | similar to dihydroxyacetone kinase                                              | 2.1.1 | 4.088 up  |
| <i>lmo0347</i> | similar to dihydroxyacetone kinase                                              | 2.1.1 | 3.007 up  |
| <i>lmo0345</i> | similar to sugar-phosphate isomerase                                            | 2.1.1 | 2.632 up  |
| <i>lmo0319</i> | similar to phospho-beta-glucosidase                                             | 2.1.1 | 2.193 up  |
| <i>lmo0300</i> | similar to phospho-beta-glucosidase and phospho-beta-galactosidase              | 2.1.1 | 11.617 up |
| <i>lmo0105</i> | highly similar to chitinase B                                                   | 2.1.1 | 34.138 up |
| <i>lmo2172</i> | similar to propionate CoA-transferase                                           | 2.1.1 | 4.861 up  |
| <i>lmo1999</i> | weakly similar to glucosamine-fructose-6-phosphate aminotransferase             | 2.1.1 | 7.159 up  |
| <i>lmo1998</i> | similar to opine catabolism protein                                             | 2.1.1 | 4.561 up  |
| <i>lmo0502</i> | similar to putative sugar-phosphate isomerase                                   | 2.1.1 | 4.322 up  |
| <i>lmo2175</i> | similar to dehydrogenase                                                        | 2.1.1 | 7.305 up  |
| <i>lmo0344</i> | similar to dehydrogenase/reductase                                              | 2.1.1 | 2.317 up  |
| <i>lmo2800</i> | similar to dehydrogenase                                                        | 2.1.1 | 3.867 up  |
| <i>lmo2586</i> | similar to formate dehydrogenase alpha chain                                    | 2.1.1 | 7.368 up  |
| <i>lmo0640</i> | similar to oxidoreductase                                                       | 2.1.1 | 2.295 up  |
| <i>lmo0025</i> | similar to phosphoheptose isomerase                                             | 2.1.1 | 2.012 up  |
| <i>lmo2122</i> | similar to maltodextrin utilization protein MalA                                | 2.1.1 | 9.721 up  |
| <i>leuB</i>    | similar to 3-isopropylmalate dehydrogenase                                      | 2.2   | 3.317 up  |
| <i>argH</i>    | similar to argininosuccinate lyase                                              | 2.2   | 5.961 up  |
| <i>argG</i>    | similar to argininosuccinate synthase                                           | 2.2   | 4.707 up  |
| <i>ilvA</i>    | similar to threonine dehydratase                                                | 2.2   | 3.346 up  |
| <i>leuD</i>    | similar to 3-isopropylmalate dehydratase (small subunit)                        | 2.2   | 3.662 up  |
| <i>leuC</i>    | similar to 3-isopropylmalate dehydratase (large subunit)                        | 2.2   | 3.209 up  |
| <i>leuA</i>    | similar to 2-isopropylmalate synthase                                           | 2.2   | 4.040 up  |
| <i>ilvN</i>    | similar to acetolactate synthase (acetohydroxy-acid synthase) (small subunit)   | 2.2   | 3.951 up  |
| <i>argC</i>    | similar to N-acetylglutamate gamma-semialdehyde dehydrogenases                  | 2.2   | 4.317 up  |
| <i>argJ</i>    | highly similar to ornithine acetyltransferase and amino-acid acetyltransferases | 2.2   | 3.770 up  |
| <i>argB</i>    | highly similar to N-acetylglutamate 5-phosphotransferase                        | 2.2   | 2.314 up  |
| <i>lmo1350</i> | similar to glycine dehydrogenase (decarboxylating) subunit 2                    | 2.2   | 3.829 up  |
| <i>lmo1349</i> | similar to glycine dehydrogenase (decarboxylating) subunit 1                    | 2.2   | 7.360 up  |
| <i>lmo1348</i> | similar to aminomethyltransferase                                               | 2.2   | 4.328 up  |
| <i>lmo0265</i> | similar to succinyldiaminopimelate desuccinylase                                | 2.2   | 2.270 up  |
| <i>lmo0039</i> | similar to carbamate kinase                                                     | 2.2   | 2.448 up  |
| <i>ilvD</i>    | similar to dihydroxy-acid dehydratase                                           | 2.2   | 2.438 up  |
| <i>ilvC</i>    | similar to ketol-acid reductoisomerase (acetohydroxy-acid isomeroreductase)     | 2.2   | 4.822 up  |
| <i>ilvB</i>    | similar to acetolactate synthase (acetohydroxy-acid synthase) (large subunit)   | 2.2   | 4.107 up  |
| <i>lmo1992</i> | similar to alpha-acetolactate decarboxylase                                     | 2.2   | 2.197 up  |
| <i>lmo2819</i> | similar to carboxypeptidase                                                     | 2.2   | 2.630 up  |
| <i>lmo2817</i> | similar to peptidases                                                           | 2.2   | 6.409 up  |
| <i>lmo2647</i> | similar to creatinine amidohydrolase                                            | 2.2   | 53.486 up |
| <i>lmo2742</i> | hypothetical protein                                                            | 5.2   | 9.154 up  |
| <i>lmo0471</i> | hypothetical protein                                                            | 5.2   | 2.647 up  |
| <i>lmo2158</i> | similar to B. subtilis YwmG protein                                             | 5.2   | 2.627 up  |

|                |                                                                                    |     |           |
|----------------|------------------------------------------------------------------------------------|-----|-----------|
| <i>lmo2603</i> | hypothetical protein                                                               | 5.2 | 2.421 up  |
| <i>lmo0038</i> | conserved hypothetical protein                                                     | 5.2 | 2.182 up  |
| <i>lmo1256</i> | hypothetical protein                                                               | 5.2 | 2.998 up  |
| <i>lmo2736</i> | conserved hypothetical protein                                                     | 5.2 | 2.065 up  |
| <i>lmo2162</i> | similar to unknown proteins                                                        | 5.2 | 5.404 up  |
| <i>lmo2161</i> | hypothetical protein                                                               | 5.2 | 3.610 up  |
| <i>lmo2160</i> | similar to unknown proteins                                                        | 5.2 | 2.970 up  |
| <i>lmo0879</i> | hypothetical protein                                                               | 5.2 | 3.296 up  |
| <i>lmo2511</i> | similar to conserved hypothetical proteins like to <i>B. subtilis</i> YvyD protein | 5.2 | 3.764 up  |
| <i>lmo0629</i> | hypothetical protein                                                               | 5.2 | 2.153 up  |
| <i>lmo1830</i> | similar to conserved hypothetical proteins                                         | 5.2 | 2.456 up  |
| <i>lmo2213</i> | similar to unknown protein                                                         | 5.2 | 2.514 up  |
| <i>lmo2170</i> | similar to unknown proteins                                                        | 5.2 | 2.132 up  |
| <i>lmo0869</i> | hypothetical protein                                                               | 5.2 | 3.084 up  |
| <i>lmo0584</i> | conserved hypothetical membrane protein                                            | 5.2 | 2.929 up  |
| <i>lmo0323</i> | similar to unknown proteins                                                        | 5.2 | 3.948 up  |
| <i>lmo0134</i> | similar to <i>E. coli</i> YjdJ protein                                             | 5.2 | 2.804 up  |
| <i>lmo2846</i> | highly similar to <i>B. subtilis</i> YulD protein                                  | 5.2 | 2.508 up  |
| <i>lmo2724</i> | similar to unknown proteins                                                        | 5.2 | 2.409 up  |
| <i>lmo2670</i> | conserved hypothetical protein                                                     | 5.2 | 3.495 up  |
| <i>lmo2585</i> | similar to <i>B. subtilis</i> YrhD protein                                         | 5.2 | 7.101 up  |
| <i>lmo2570</i> | hypothetical protein                                                               | 5.2 | 2.112 up  |
| <i>lmo2487</i> | similar to <i>B. subtilis</i> YvlB protein                                         | 5.2 | 2.307 up  |
| <i>lmo2357</i> | similar to unknown protein                                                         | 5.2 | 2.564 up  |
| <i>lmo1718</i> | similar to putative outer surface protein                                          | 5.2 | 4.872 up  |
| <i>lmo1241</i> | hypothetical protein                                                               | 5.2 | 2.366 up  |
| <i>lmo1140</i> | hypothetical protein                                                               | 5.2 | 2.466 up  |
| <i>lmo0870</i> | hypothetical protein                                                               | 5.2 | 2.569 up  |
| <i>lmo0796</i> | conserved hypothetical protein                                                     | 5.2 | 2.209 up  |
| <i>lmo0496</i> | similar to <i>B. subtilis</i> YnzC protein                                         | 5.2 | 2.259 up  |
| <i>lmo0351</i> | similar to unknown proteins                                                        | 5.2 | 7.184 up  |
| <i>lmo0133</i> | similar to <i>E. coli</i> YjdI protein                                             | 5.2 | 2.363 up  |
| <i>lmo0720</i> | hypothetical protein                                                               | 5.2 | 2.378 up  |
| <i>lmo2673</i> | conserved hypothetical protein                                                     | 5.2 | 2.096 up  |
| <i>lmo1580</i> | similar to unknown protein                                                         | 5.2 | 2.291 up  |
| <i>lmo0515</i> | conserved hypothetical protein                                                     | 5.2 | 2.990 up  |
| <i>lmo2645</i> | hypothetical protein                                                               | 5.2 | 40.633 up |
