# Supplementary material for: Changes in Gene Expression during Adaptation of Listeria monocytogenes to the Soil Environment
Source: PubMed Central journal article supplement (PMC3179493; doi:10.1371/journal.pone.0024881), 2011-09-23
Supplement: pone.0024881.s005.pdf [file pone.0024881.s005.pdf]

Table S5. Gene ontology « functional category » 30 minutes

| gene name      | description                                                                       | category | fold change |
|----------------|-----------------------------------------------------------------------------------|----------|-------------|
| <i>lmo2171</i> | similar to antiporter proteins                                                    | 1.2      | 4.328 up    |
| <i>lmo2818</i> | similar to transmembrane efflux protein                                           | 1.2      | 4.878 up    |
| <i>lmo0021</i> | similar to PTS system. fructose-specific IIA component                            | 1.2      | 12.812 up   |
| <i>lmo0022</i> | similar to PTS system. fructose-specific IIB component                            | 1.2      | 19.697 up   |
| <i>lmo0023</i> | similar to PTS system. fructose-specific IIC component                            | 1.2      | 14.374 up   |
| <i>lmo0024</i> | similar to PTS system. mannose-specific IID component                             | 1.2      | 25.296 up   |
| <i>lmo0027</i> | similar to PTS system. beta-glucosides specific enzyme IIABC                      | 1.2      | 41.540 up   |
| <i>lmo0181</i> | similar to sugar ABC transporter. sugar-binding protein                           | 1.2      | 2.426 up    |
| <i>lmo0298</i> | similar to PTS beta-glucoside-specific enzyme IIC component                       | 1.2      | 15.822 up   |
| <i>lmo0299</i> | similar to PTS beta-glucoside-specific enzyme IIB component                       | 1.2      | 17.041 up   |
| <i>lmo0301</i> | similar to PTS beta-glucoside-specific enzyme IIA component                       | 1.2      | 12.663 up   |
| <i>lmo0399</i> | similar to fructose-specific phosphotransferase enzyme IIB                        | 1.2      | 3.478 up    |
| <i>lmo0400</i> | similar to fructose-specific phosphotransferase enzyme IIC                        | 1.2      | 7.580 up    |
| <i>lmo0544</i> | similar to PTS system. glucitol/sorbitol-specific enzyme II CII component         | 1.2      | 7.390 up    |
| <i>lmo0632</i> | similar to PTS system. fructose-specific IIC component                            | 1.2      | 4.672 up    |
| <i>lmo0633</i> | similar to PTS system. fructose-specific IIB component                            | 1.2      | 4.049 up    |
| <i>lmo0781</i> | similar to mannose-specific phosphotransferase system (PTS) component IID         | 1.2      | 2.357 up    |
| <i>lmo0874</i> | similar to PTS system enzyme IIA component                                        | 1.2      | 6.369 up    |
| <i>lmo0875</i> | similar to PTS system. beta-glucoside enzyme IIB component                        | 1.2      | 3.987 up    |
| <i>lmo0876</i> | similar to PTS system. Lichenan-specific enzyme IIC component                     | 1.2      | 3.381 up    |
| <i>lmo0914</i> | similar to PTS system. IIB component                                              | 1.2      | 21.601 up   |
| <i>lmo0915</i> | similar to phosphotransferase system enzyme IIC                                   | 1.2      | 25.705 up   |
| <i>lmo0916</i> | similar to phosphotransferase system enzyme IIA                                   | 1.2      | 49.999 up   |
| <i>lmo1719</i> | similar to phosphotransferase system (PTS) lichenan-specific enzyme IIA component | 1.2      | 4.219 up    |
| <i>lmo1720</i> | similar to phosphotransferase system (PTS) lichenan-specific enzyme IIB component | 1.2      | 3.472 up    |
| <i>lmo1730</i> | similar to sugar ABC transporter binding protein                                  | 1.2      | 12.135 up   |
| <i>lmo1731</i> | similar to sugar ABC transporter. permease protein                                | 1.2      | 6.124 up    |
| <i>lmo1732</i> | similar to sugar ABC transporter. permease protein                                | 1.2      | 4.314 up    |
| <i>lmo1997</i> | similar to PTS mannose-specific enzyme IIA component                              | 1.2      | 6.082 up    |
| <i>lmo2000</i> | similar to PTS mannose-specific enzyme IID component                              | 1.2      | 13.563 up   |
| <i>lmo2001</i> | similar to PTS mannose-specific enzyme IIC component                              | 1.2      | 7.748 up    |
| <i>lmo2002</i> | similar to PTS mannose-specific enzyme IIB component                              | 1.2      | 7.982 up    |
| <i>lmo2123</i> | similar to maltodextrin ABC-transport system (permease)                           | 1.2      | 17.192 up   |
| <i>lmo2124</i> | similar to maltodextrin ABC-transport system (permease)                           | 1.2      | 6.687 up    |
| <i>lmo2125</i> | similar to maltose/maltodextrin ABC-transporter (binding protein)                 | 1.2      | 14.136 up   |
| <i>lmo2135</i> | similar to PTS system. fructose-specific enzyme IIC component                     | 1.2      | 3.002 up    |
| <i>lmo2136</i> | similar to PTS system. fructose-specific enzyme IIB component                     | 1.2      | 4.674 up    |
| <i>lmo2650</i> | similar to hypothetical PTS enzyme IIB component                                  | 1.2      | 29.323 up   |
| <i>lmo2665</i> | similar to PTS system galactitol-specific enzyme IIC component                    | 1.2      | 20.652 up   |
| <i>lmo2666</i> | similar to PTS system galactitol-specific enzyme IIB component                    | 1.2      | 17.375 up   |
| <i>lmo2683</i> | similar to cellobiose phosphotransferase enzyme IIB component                     | 1.2      | 5.149 up    |
| <i>lmo2684</i> | similar to cellobiose phosphotransferase enzyme IIC component                     | 1.2      | 7.871 up    |
| <i>lmo2685</i> | similar to cellobiose phosphotransferase enzyme IIA component                     | 1.2      | 11.108 up   |
| <i>lmo2708</i> | similar to PTS system. cellobiose-specific enzyme IIC                             | 1.2      | 9.915 up    |
| <i>lmo2733</i> | similar to PTS system. fructose-specific IIABC component                          | 1.2      | 4.004 up    |

|                |                                                                              |       |            |
|----------------|------------------------------------------------------------------------------|-------|------------|
| <i>lmo2772</i> | similar to beta-glucoside-specific enzyme IIABC                              | 1.2   | 4.320 up   |
| <i>lmo2780</i> | similar to cellobiose PTS enzyme IIA                                         | 1.2   | 3.593 up   |
| <i>lmo2782</i> | similar to PTS. cellobiose-specific IIB component                            | 1.2   | 31.364 up  |
| <i>lmo2783</i> | similar to cellobiose phosphotransferase system enzyme IIC                   | 1.2   | 17.189 up  |
| <i>lmo2799</i> | similar to phosphotransferase system mannitol-specific enzyme IIBC           | 1.2   | 18.475 up  |
| <i>lmo2816</i> | similar to transport protein                                                 | 1.2   | 9.502 up   |
| <i>lmo2850</i> | similar to sugar transport proteins                                          | 1.2   | 21.620 up  |
| <i>lmo0358</i> | similar to PTS system. fructose-specific enzyme IIBC component               | 1.2   | 2.452 up   |
| <i>lmo0507</i> | similar to PTS system. Galactitol-specific IIB component                     | 1.2   | 2.487 up   |
| <i>lmo0398</i> | similar to phosphotransferase system enzyme IIA                              | 1.2   | 3.361 up   |
| <i>lmo0503</i> | similar to PTS fructose-specific enzyme IIA component                        | 1.2   | 4.361 up   |
| <i>lmo0631</i> | similar to PTS system. fructose-specific IIA component                       | 1.2   | 2.922 up   |
| <i>lmo2137</i> | similar to PTS system. fructose-specific enzyme IIA component                | 1.2   | 4.918 up   |
| <i>lmo2651</i> | similar to mannitol-specific PTS enzyme IIA component                        | 1.2   | 33.793 up  |
| <i>lmo2667</i> | similar to PTS system galactitol-specific enzyme IIA component               | 1.2   | 8.907 up   |
| <i>kdpB</i>    | potassium-transporting atpase b chain                                        | 1.2   | 2.615 up   |
| <i>kdpA</i>    | highly similar to potassium-transporting atpase a chain                      | 1.2   | 2.860 up   |
| <i>kdpC</i>    | potassium-transporting atpase c chain                                        | 1.2   | 2.308 up   |
| <i>lmo2649</i> | similar to hypothetical PTS enzyme IIC component                             | 1.2   | 48.264 up  |
| <i>lmo0608</i> | similar to ABC transporter. ATP-binding protein                              | 1.2   | 2.181 up   |
| <i>lmo0986</i> | similar to antibiotic ABC transporter. ATP-binding protein.                  | 1.2   | 13.445 up  |
| <i>lmo0383</i> | highly similar to B. subtilis methylmalonate-semialdehyde dehydrogenase IolA | 2.1.1 | 8.293 up   |
| <i>lmo0878</i> | similar to oxidoreductases                                                   | 2.1.1 | 5.696 up   |
| <i>glpD</i>    | similar to glycerol 3 phosphate dehydrogenase                                | 2.1.1 | 2.850 up   |
| <i>lmo1538</i> | similar to glycerol kinase                                                   | 2.1.1 | 3.258 up   |
| <i>lmo2584</i> | similar to formate dehydrogenase associated protein                          | 2.1.1 | 3.892 up   |
| <i>lmo0386</i> | similar to B. subtilis IolD protein. to acetolactate synthase                | 2.1.1 | 5.058 up   |
| <i>lmo2663</i> | similar to polyol dehydrogenase                                              | 2.1.1 | 21.145 up  |
| <i>lmo2664</i> | similar to sorbitol dehydrogenase                                            | 2.1.1 | 16.266 up  |
| <i>lmo0105</i> | highly similar to chitinase B                                                | 2.1.1 | 43.506 up  |
| <i>lmo0300</i> | similar to phospho-beta-glucosidase and phospho-beta-galactosidase           | 2.1.1 | 13.810 up  |
| <i>lmo0319</i> | similar to phospho-beta-glucosidase                                          | 2.1.1 | 3.403 up   |
| <i>lmo0345</i> | similar to sugar-phosphate isomerase                                         | 2.1.1 | 5.345 up   |
| <i>lmo0347</i> | similar to dihydroxyacetone kinase                                           | 2.1.1 | 5.598 up   |
| <i>lmo0348</i> | similar to dihydroxyacetone kinase                                           | 2.1.1 | 6.555 up   |
| <i>lmo0384</i> | similar to B. subtilis IolB protein                                          | 2.1.1 | 9.531 up   |
| <i>lmo0385</i> | similar to B. subtilis IolC protein and to fructokinase                      | 2.1.1 | 5.751 up   |
| <i>lmo0401</i> | highly similar to E. coli YbgG protein. a putative sugar hydrolase           | 2.1.1 | 20.009 up  |
| <i>lmo0536</i> | similar to 6-phospho-beta-glucosidase                                        | 2.1.1 | 5.857 up   |
| <i>lmo0634</i> | similar to an E. coli putative tagatose 6-phosphate kinase                   | 2.1.1 | 3.930 up   |
| <i>lmo0643</i> | similar to putative transaldolase                                            | 2.1.1 | 4.796 up   |
| <i>lmo0877</i> | similar to B. subtilis NagB protein (glucosamine-6-phosphate isomerase)      | 2.1.1 | 3.630 up   |
| <i>lmo0917</i> | similar to beta-glucosidase                                                  | 2.1.1 | 103.336 up |
| <i>lmo0957</i> | similar to glucosamine-6-Phosphate isomerase (EC 5.3.1.10)                   | 2.1.1 | 2.653 up   |
| <i>lmo1729</i> | similar to beta-glucosidases                                                 | 2.1.1 | 2.971 up   |
| <i>lmo1883</i> | similar to chitinases                                                        | 2.1.1 | 6.114 up   |
| <i>lmo2121</i> | similar to maltosephosphorylase                                              | 2.1.1 | 23.635 up  |
| <i>lmo2661</i> | similar to ribulose-5-phosphate 3-epimerase                                  | 2.1.1 | 16.768 up  |

|                |                                                                                 |       |            |
|----------------|---------------------------------------------------------------------------------|-------|------------|
| <i>lmo2662</i> | similar to ribose 5-phosphate epimerase                                         | 2.1.1 | 13.639 up  |
| <i>lmo2674</i> | similar to ribose 5-phosphate epimerase                                         | 2.1.1 | 4.027 up   |
| <i>lmo2734</i> | weakly similar to sugar hydrolase                                               | 2.1.1 | 6.173 up   |
| <i>lmo2735</i> | similar to Sucrose phosphorylase                                                | 2.1.1 | 7.069 up   |
| <i>lmo2743</i> | similar to transaldolase                                                        | 2.1.1 | 4.035 up   |
| <i>lmo2771</i> | similar to beta-glucosidase                                                     | 2.1.1 | 3.346 up   |
| <i>lmo2781</i> | similar to beta-glucosidase                                                     | 2.1.1 | 30.740 up  |
| <i>lmo2801</i> | similar to a putative N-acetylmannosamine-6-phosphate epimerase                 | 2.1.1 | 40.473 up  |
| <i>lmo2847</i> | highly similar to rhamnulose-1-phosphate aldolase                               | 2.1.1 | 5.645 up   |
| <i>lmo2848</i> | highly similar to L-rhamnose isomerase                                          | 2.1.1 | 12.426 up  |
| <i>lmo2849</i> | similar to rhamnulokinase                                                       | 2.1.1 | 17.831 up  |
| <i>lmo0505</i> | similar to ribulose-5-phosphate 3-epimerase                                     | 2.1.1 | 2.785 up   |
| <i>lmo0956</i> | similar to N-acetylglucosamine-6P-phosphate deacetylase (EC 3.5.1.25)           | 2.1.1 | 2.041 up   |
| <i>lmo1728</i> | some similarities to cellobiose-phosphorylase                                   | 2.1.1 | 2.358 up   |
| <i>lmo2134</i> | similar to fructose-1.6-biphosphate aldolase type II                            | 2.1.1 | 2.224 up   |
| <i>lmo2659</i> | similar to ribulose-phosphate 3-epimerase                                       | 2.1.1 | 3.035 up   |
| <i>lmo2660</i> | similar to transketolase                                                        | 2.1.1 | 4.089 up   |
| <i>lmo2696</i> | similar to hypothetical dihydroxyacetone kinase                                 | 2.1.1 | 2.110 up   |
| <i>lmo2172</i> | similar to propionate CoA-transferase                                           | 2.1.1 | 3.028 up   |
| <i>lmo0502</i> | similar to putative sugar-phosphate isomerase                                   | 2.1.1 | 6.171 up   |
| <i>lmo1998</i> | similar to opine catabolism protein                                             | 2.1.1 | 6.294 up   |
| <i>lmo1999</i> | weakly similar to glucosamine-fructose-6-phosphate aminotransferase             | 2.1.1 | 10.879 up  |
| <i>lmo0344</i> | similar to dehydrogenase/reductase                                              | 2.1.1 | 6.249 up   |
| <i>lmo2175</i> | similar to dehydrogenase                                                        | 2.1.1 | 11.559 up  |
| <i>lmo2586</i> | similar to formate dehydrogenase alpha chain                                    | 2.1.1 | 10.877 up  |
| <i>lmo2800</i> | similar to dehydrogenase                                                        | 2.1.1 | 19.916 up  |
| <i>lmo2122</i> | similar to maltodextrose utilization protein MalA                               | 2.1.1 | 17.860 up  |
| <i>leuB</i>    | similar to 3-isopropylmalate dehydrogenase                                      | 2.2   | 2.954 up   |
| <i>lmo0039</i> | similar to carbamate kinase                                                     | 2.2   | 2.076 up   |
| <i>lmo0265</i> | similar to succinyldiaminopimelate desuccinylase                                | 2.2   | 2.498 up   |
| <i>lmo1348</i> | similar to aminomethyltransferase                                               | 2.2   | 2.629 up   |
| <i>lmo1349</i> | similar to glycine dehydrogenase (decarboxylating) subunit 1                    | 2.2   | 9.321 up   |
| <i>lmo1350</i> | similar to glycine dehydrogenase (decarboxylating) subunit 2                    | 2.2   | 4.750 up   |
| <i>argB</i>    | highly similar to N-acetylglutamate 5-phosphotransferase                        | 2.2   | 4.836 up   |
| <i>argJ</i>    | highly similar to ornithine acetyltransferase and amino-acid acetyltransferases | 2.2   | 7.591 up   |
| <i>argC</i>    | similar to N-acetylglutamate gamma-semialdehyde dehydrogenases                  | 2.2   | 4.334 up   |
| <i>ilvN</i>    | similar to acetolactate synthase (acetohydroxy-acid synthase) (small subunit)   | 2.2   | 3.287 up   |
| <i>leuA</i>    | similar to 2-isopropylmalate synthase                                           | 2.2   | 3.654 up   |
| <i>leuC</i>    | similar to 3-isopropylmalate dehydratase (large subunit)                        | 2.2   | 2.889 up   |
| <i>leuD</i>    | similar to 3-isopropylmalate dehydratase (small subunit)                        | 2.2   | 2.656 up   |
| <i>ilvA</i>    | similar to threonine dehydratase                                                | 2.2   | 2.947 up   |
| <i>argG</i>    | similar to argininosuccinate synthase                                           | 2.2   | 4.368 up   |
| <i>argH</i>    | similar to argininosuccinate lyase                                              | 2.2   | 5.981 up   |
| <i>argF</i>    | highly similar to ornithine carbamoyltransferase                                | 2.2   | 2.258 up   |
| <i>argD</i>    | highly similar to N-acetylornithine aminotransferase                            | 2.2   | 3.658 up   |
| <i>ilvB</i>    | similar to acetolactate synthase (acetohydroxy-acid synthase) (large subunit)   | 2.2   | 3.381 up   |
| <i>ilvC</i>    | similar to ketol-acid reductoisomerase (acetohydroxy-acid isomeroeductase)      | 2.2   | 3.737 up   |
| <i>lmo2647</i> | similar to creatinine amidohydrolase                                            | 2.2   | 144.279 up |

|                |                                                                             |     |          |
|----------------|-----------------------------------------------------------------------------|-----|----------|
| <i>lmo2817</i> | similar to peptidases                                                       | 2.2 | 4.167 up |
| <i>lmo2819</i> | similar to carboxypeptidase                                                 | 2.2 | 2.698 up |
| <i>lmo0113</i> | similar to protein gp35 from Bacteriophage A118                             | 4.3 | 2.892 up |
| <i>lmo0123</i> | similar to protein gp18 from Bacteriophage A118                             | 4.3 | 2.046 up |
| <i>lmo0127</i> | weakly similar to protein gp20 from Bacteriophage A118                      | 4.3 | 2.074 up |
| <i>lmo2279</i> | holin [Bacteriophage A118]                                                  | 4.3 | 2.002 up |
| <i>lmo2281</i> | protein gp22 [Bacteriophage A118]                                           | 4.3 | 2.399 up |
| <i>lmo2282</i> | protein gp21 [Bacteriophage A118]                                           | 4.3 | 2.290 up |
| <i>lmo2285</i> | Protein gp18 [Bacteriophage A118]                                           | 4.3 | 2.063 up |
| <i>lmo2288</i> | Protein gp15 [Bacteriophage A118]                                           | 4.3 | 2.511 up |
| <i>lmo2289</i> | Protein gp14 [Bacteriophage A118]                                           | 4.3 | 2.047 up |
| <i>lmo2292</i> | Protein gp11 [Bacteriophage A118]                                           | 4.3 | 2.000 up |
| <i>lmo2298</i> | Protein gp4 [Bacteriophage A118]                                            | 4.3 | 2.563 up |
| <i>lmo2299</i> | putative portal protein [Bacteriophage A118]                                | 4.3 | 2.742 up |
| <i>lmo2303</i> | Protein gp66 [Bacteriophage A118]                                           | 4.3 | 2.974 up |
| <i>lmo2304</i> | Bacteriophage A118 gp65 protein                                             | 4.3 | 2.331 up |
| <i>lmo2306</i> | similar to phage protein                                                    | 4.3 | 2.759 up |
| <i>lmo2315</i> | similar to protein gp51 [Bacteriophage A118]                                | 4.3 | 2.405 up |
| <i>lmo2322</i> | gp44 [Bacteriophage A118]                                                   | 4.3 | 2.217 up |
| <i>lmo2323</i> | gp43 [Bacteriophage A118]                                                   | 4.3 | 2.013 up |
| <i>lmo2326</i> | similar to protein gp41 [Bacteriophage A118]                                | 4.3 | 2.602 up |
| <i>lmo2301</i> | similar to putative terminase small subunit from Bacteriophage A118         | 4.3 | 2.780 up |
| <i>lmo2317</i> | similar to protein gp49 [Bacteriophage A118]                                | 4.3 | 2.253 up |
| <i>lmo0128</i> | similar to a protein from Bacteriophage phi-105 (ORF 45)                    | 4.3 | 2.131 up |
| <i>lmo2287</i> | putative tape-measure [Bacteriophage A118]                                  | 4.3 | 2.144 up |
| <i>lmo2300</i> | putative terminase large subunit from Bacteriophage A118                    | 4.3 | 2.019 up |
| <i>lmo2286</i> | Protein gp17 [Bacteriophage A118]                                           | 4.3 | 2.261 up |
| <i>lmo2294</i> | Protein gp9 [Bacteriophage A118]                                            | 4.3 | 2.142 up |
| <i>lmo0471</i> | hypothetical protein                                                        | 5.2 | 2.147 up |
| <i>lmo2742</i> | hypothetical protein                                                        | 5.2 | 5.680 up |
| <i>lmo0119</i> | hypothetical protein                                                        | 5.2 | 2.224 up |
| <i>lmo0879</i> | hypothetical protein                                                        | 5.2 | 3.847 up |
| <i>lmo2160</i> | similar to unknown proteins                                                 | 5.2 | 4.678 up |
| <i>lmo2161</i> | hypothetical protein                                                        | 5.2 | 5.420 up |
| <i>lmo2162</i> | similar to unknown proteins                                                 | 5.2 | 7.140 up |
| <i>lmo2736</i> | conserved hypothetical protein                                              | 5.2 | 3.193 up |
| <i>lmo2511</i> | similar to conserved hypothetical proteins like to B. subtilis YvyD protein | 5.2 | 4.051 up |
| <i>lmo0955</i> | hypothetical protein                                                        | 5.2 | 5.585 up |
| <i>lmo2391</i> | conserved hypothetical protein similar to B. subtilis YhfK protein          | 5.2 | 2.256 up |
| <i>lmo0629</i> | hypothetical protein                                                        | 5.2 | 2.377 up |
| <i>lmo0134</i> | similar to E. coli YjdJ protein                                             | 5.2 | 2.746 up |
| <i>lmo0323</i> | similar to unknown proteins                                                 | 5.2 | 2.845 up |
| <i>lmo0584</i> | conserved hypothetical membrane protein                                     | 5.2 | 3.325 up |
| <i>lmo0869</i> | hypothetical protein                                                        | 5.2 | 2.975 up |
| <i>lmo1966</i> | similar to unknown proteins                                                 | 5.2 | 4.594 up |
| <i>lmo0133</i> | similar to E. coli YjdI protein                                             | 5.2 | 2.415 up |
| <i>lmo0351</i> | similar to unknown proteins                                                 | 5.2 | 2.768 up |
| <i>lmo1140</i> | hypothetical protein                                                        | 5.2 | 2.322 up |

|                |                                                  |     |            |
|----------------|--------------------------------------------------|-----|------------|
| <i>lmo1241</i> | hypothetical protein                             | 5.2 | 2.147 up   |
| <i>lmo1718</i> | similar to putative outer surface protein        | 5.2 | 4.214 up   |
| <i>lmo2487</i> | similar to B. subtilis YvlB protein              | 5.2 | 8.833 up   |
| <i>lmo2570</i> | hypothetical protein                             | 5.2 | 2.521 up   |
| <i>lmo2585</i> | similar to B. subtilis YrhD protein              | 5.2 | 11.917 up  |
| <i>lmo2670</i> | conserved hypothetical protein                   | 5.2 | 2.899 up   |
| <i>lmo2846</i> | highly similar to B. subtilis YulD protein       | 5.2 | 3.303 up   |
| <i>lmo0047</i> | hypothetical protein                             | 5.2 | 2.229 up   |
| <i>lmo0987</i> | similar to Streptococcus agalactiae CylB protein | 5.2 | 2.644 up   |
| <i>lmo2486</i> | hypothetical protein                             | 5.2 | 2.402 up   |
| <i>lmo2697</i> | hypothetical protein                             | 5.2 | 2.230 up   |
| <i>lmo0515</i> | conserved hypothetical protein                   | 5.2 | 2.850 up   |
| <i>lmo1580</i> | similar to unknown protein                       | 5.2 | 2.612 up   |
| <i>lmo2673</i> | conserved hypothetical protein                   | 5.2 | 3.022 up   |
| <i>lmo2645</i> | hypothetical protein                             | 5.2 | 142.954 up |
