# Supplementary material for: Changes in Gene Expression during Adaptation of Listeria monocytogenes to the Soil Environment
Source: PubMed Central journal article supplement (PMC3179493; doi:10.1371/journal.pone.0024881), 2011-09-23
Supplement: pone.0024881.s006.pdf [file pone.0024881.s006.pdf]

Table S6. Gene ontology « functional categories » 18 h

| name           | description                                                                       | category | fold change |
|----------------|-----------------------------------------------------------------------------------|----------|-------------|
| <i>lmo2818</i> | similar to transmembrane efflux protein                                           | 1.2      | 4.878 up    |
| <i>lmo0021</i> | similar to PTS system, fructose-specific IIA component                            | 1.2      | 12.812 up   |
| <i>lmo0022</i> | similar to PTS system, fructose-specific IIB component                            | 1.2      | 19.697 up   |
| <i>lmo0023</i> | similar to PTS system, fructose-specific IIC component                            | 1.2      | 14.374 up   |
| <i>lmo0024</i> | similar to PTS system, mannose-specific IID component                             | 1.2      | 25.296 up   |
| <i>lmo0027</i> | similar to PTS system, beta-glucosides specific enzyme IIABC                      | 1.2      | 41.540 up   |
| <i>lmo0298</i> | similar to PTS beta-glucoside-specific enzyme IIC component                       | 1.2      | 15.822 up   |
| <i>lmo0299</i> | similar to PTS beta-glucoside-specific enzyme IIB component                       | 1.2      | 17.041 up   |
| <i>lmo0301</i> | similar to PTS beta-glucoside-specific enzyme IIA component                       | 1.2      | 12.663 up   |
| <i>lmo0400</i> | similar to fructose-specific phosphotransferase enzyme IIC                        | 1.2      | 7.580 up    |
| <i>lmo0544</i> | similar to PTS system, glucitol/sorbitol-specific enzyme II CII component         | 1.2      | 7.390 up    |
| <i>lmo0914</i> | similar to PTS system, IIB component                                              | 1.2      | 21.601 up   |
| <i>lmo0915</i> | similar to phosphotransferase system enzyme IIC                                   | 1.2      | 25.705 up   |
| <i>lmo0916</i> | similar to phosphotransferase system enzyme IIA                                   | 1.2      | 49.999 up   |
| <i>lmo1719</i> | similar to phosphotransferase system (PTS) lichenan-specific enzyme IIA component | 1.2      | 4.219 up    |
| <i>lmo1720</i> | similar to phosphotransferase system (PTS) lichenan-specific enzyme IIB component | 1.2      | 3.472 up    |
| <i>lmo1730</i> | similar to sugar ABC transporter binding protein                                  | 1.2      | 12.135 up   |
| <i>lmo2000</i> | similar to PTS mannose-specific enzyme IID component                              | 1.2      | 13.563 up   |
| <i>lmo2002</i> | similar to PTS mannose-specific enzyme IIB component                              | 1.2      | 7.982 up    |
| <i>lmo2123</i> | similar to maltodextrin ABC-transport system (permease)                           | 1.2      | 17.192 up   |
| <i>lmo2125</i> | similar to maltose/maltodextrin ABC-transporter (binding protein)                 | 1.2      | 14.136 up   |
| <i>lmo2650</i> | similar to hypothetical PTS enzyme IIB component                                  | 1.2      | 29.323 up   |
| <i>lmo2665</i> | similar to PTS system galactitol-specific enzyme IIC component                    | 1.2      | 20.652 up   |
| <i>lmo2666</i> | similar to PTS system galactitol-specific enzyme IIB component                    | 1.2      | 17.375 up   |
| <i>lmo2683</i> | similar to cellobiose phosphotransferase enzyme IIB component                     | 1.2      | 5.149 up    |
| <i>lmo2684</i> | similar to cellobiose phosphotransferase enzyme IIC component                     | 1.2      | 7.871 up    |
| <i>lmo2685</i> | similar to cellobiose phosphotransferase enzyme IIA component                     | 1.2      | 11.108 up   |
| <i>lmo2708</i> | similar to PTS system, cellobiose-specific enzyme IIC                             | 1.2      | 9.915 up    |
| <i>lmo2782</i> | similar to PTS, cellobiose-specific IIB component                                 | 1.2      | 31.364 up   |
| <i>lmo2783</i> | similar to cellobiose phosphotransferase system enzyme IIC                        | 1.2      | 17.189 up   |
| <i>lmo2799</i> | similar to phosphotransferase system mannitol-specific enzyme IIBC                | 1.2      | 18.475 up   |
| <i>lmo2816</i> | similar to transport protein                                                      | 1.2      | 9.502 up    |
| <i>lmo2850</i> | similar to sugar transport proteins                                               | 1.2      | 21.620 up   |
| <i>lmo2651</i> | similar to mannitol-specific PTS enzyme IIA component                             | 1.2      | 33.793 up   |
| <i>lmo2667</i> | similar to PTS system galactitol-specific enzyme IIA component                    | 1.2      | 8.907 up    |
| <i>kdpB</i>    | potassium-transporting atpase b chain                                             | 1.2      | 2.615 up    |
| <i>lmo2649</i> | similar to hypothetical PTS enzyme IIC component                                  | 1.2      | 48.264 up   |
| <i>glpD</i>    | similar to glycerol 3 phosphate dehydrogenase                                     | 2.1.1    | 2.850 up    |
| <i>lmo2663</i> | similar to polyol dehydrogenase                                                   | 2.1.1    | 21.145 up   |
| <i>lmo2664</i> | similar to sorbitol dehydrogenase                                                 | 2.1.1    | 16.266 up   |
| <i>lmo0105</i> | highly similar to chitinase B                                                     | 2.1.1    | 43.506 up   |
| <i>lmo0300</i> | similar to phospho-beta-glucosidase and phospho-beta-galactosidase                | 2.1.1    | 13.810 up   |
| <i>lmo0348</i> | similar to dihydroxyacetone kinase                                                | 2.1.1    | 6.555 up    |
| <i>lmo0401</i> | highly similar to E. col YbgG protein, a putative sugar hydrolase                 | 2.1.1    | 20.009 up   |
| <i>lmo0643</i> | similar to putative transaldolase                                                 | 2.1.1    | 4.796 up    |
| <i>lmo0877</i> | similar to B. subtilis NagB protein (glucosamine-6-phosphate isomerase)           | 2.1.1    | 3.630 up    |

|                |                                                                     |       |            |
|----------------|---------------------------------------------------------------------|-------|------------|
| <i>lmo0917</i> | similar to beta-glucosidase                                         | 2.1.1 | 103.336 up |
| <i>lmo0957</i> | similar to glucosamine-6-Phosphate isomerase (EC 5.3.1.10)          | 2.1.1 | 2.653 up   |
| <i>lmo1883</i> | similar to chitinases                                               | 2.1.1 | 6.114 up   |
| <i>lmo2121</i> | similar to maltosephosphorylase                                     | 2.1.1 | 23.635 up  |
| <i>lmo2661</i> | similar to ribulose-5-phosphate 3-epimerase                         | 2.1.1 | 16.768 up  |
| <i>lmo2662</i> | similar to ribose 5-phosphate epimerase                             | 2.1.1 | 13.639 up  |
| <i>lmo2674</i> | similar to ribose 5-phosphate epimerase                             | 2.1.1 | 4.027 up   |
| <i>lmo2734</i> | weakly similar to sugar hydrolase                                   | 2.1.1 | 6.173 up   |
| <i>lmo2735</i> | similar to Sucrose phosphorylase                                    | 2.1.1 | 7.069 up   |
| <i>lmo2781</i> | similar to beta-glucosidase                                         | 2.1.1 | 30.740 up  |
| <i>lmo2801</i> | similar to a putative N-acetylmannosamine-6-phosphate epimerase     | 2.1.1 | 40.473 up  |
| <i>lmo2849</i> | similar to rhamnulokinase                                           | 2.1.1 | 17.831 up  |
| <i>lmo2172</i> | similar to propionate CoA-transferase                               | 2.1.1 | 3.028 up   |
| <i>lmo0344</i> | similar to dehydrogenase/reductase                                  | 2.1.1 | 6.249 up   |
| <i>lmo2175</i> | similar to dehydrogenase                                            | 2.1.1 | 11.559 up  |
| <i>lmo2586</i> | similar to formate dehydrogenase alpha chain                        | 2.1.1 | 10.877 up  |
| <i>lmo2122</i> | similar to maltodextrose utilization protein MalA                   | 2.1.1 | 17.860 up  |
| <i>lmo2288</i> | Protein gp15 [Bacteriophage A118]                                   | 4.3   | 2.511 up   |
| <i>lmo2298</i> | Protein gp4 [Bacteriophage A118]                                    | 4.3   | 2.563 up   |
| <i>lmo2303</i> | Protein gp66 [Bacteriophage A118]                                   | 4.3   | 2.974 up   |
| <i>lmo2306</i> | similar to phage protein                                            | 4.3   | 2.759 up   |
| <i>lmo2315</i> | similar to protein gp51 [Bacteriophage A118]                        | 4.3   | 2.405 up   |
| <i>lmo2322</i> | gp44 [Bacteriophage A118]                                           | 4.3   | 2.217 up   |
| <i>lmo2326</i> | similar to protein gp41 [Bacteriophage A118]                        | 4.3   | 2.602 up   |
| <i>lmo2301</i> | similar to putative terminase small subunit from Bacteriophage A118 | 4.3   | 2.780 up   |
| <i>lmo2742</i> | hypothetical protein                                                | 5.2   | 5.680 up   |
| <i>lmo0879</i> | hypothetical protein                                                | 5.2   | 3.847 up   |
| <i>lmo0584</i> | conserved hypothetical membrane protein                             | 5.2   | 3.325 up   |
| <i>lmo1718</i> | similar to putative outer surface protein                           | 5.2   | 4.214 up   |
| <i>lmo2585</i> | similar to B. subtilis YrhD protein                                 | 5.2   | 11.917 up  |
| <i>lmo2846</i> | highly similar to B. subtilis YulD protein                          | 5.2   | 3.303 up   |
| <i>lmo0515</i> | conserved hypothetical protein                                      | 5.2   | 2.850 up   |
| <i>lmo2673</i> | conserved hypothetical protein                                      | 5.2   | 3.022 up   |
| <i>lmo2645</i> | hypothetical protein                                                | 5.2   | 142.954 up |
