# Supplementary material for: Changes in Gene Expression during Adaptation of Listeria monocytogenes to the Soil Environment
Source: PubMed Central journal article supplement (PMC3179493; doi:10.1371/journal.pone.0024881), 2011-09-23
Supplement: pone.0024881.s007.pdf [file pone.0024881.s007.pdf]

Table S7. List of genes with higher and lower transcript levels at time 15 min identified after gene ontology with ontology terms “CodY”, “PrfA”, “SigmaB” and “PrfA/SigmaB”.

| name           | description                                                                     | Functional category | Regulon | Fold change |
|----------------|---------------------------------------------------------------------------------|---------------------|---------|-------------|
| argB           | highly similar to N-acetylglutamate 5-phosphotransferase                        | 2.2                 | CodY    | 2,314 up    |
| argG           | similar to argininosuccinate synthase                                           | 2.2                 | CodY    | 4,707 up    |
| argH           | similar to argininosuccinate lyase                                              | 2.2                 | CodY    | 5,961 up    |
| argJ           | highly similar to ornithine acetyltransferase and amino-acid acetyltransferases | 2.2                 | CodY    | 3,770 up    |
| lmo0022        | similar to PTS system, fructose-specific IIB component                          | 1.2                 | CodY    | 19,035 up   |
| lmo0298        | similar to PTS beta-glucoside-specific enzyme IIC component                     | 1.2                 | CodY    | 13,358 up   |
| lmo0299        | similar to PTS beta-glucoside-specific enzyme IIB component                     | 1.2                 | CodY    | 13,398 up   |
| lmo0344        | similar to dehydrogenase/reductase                                              | 2.1.1               | CodY    | 2,317 up    |
| lmo0345        | similar to sugar-phosphate isomerase                                            | 2.1.1               | CodY    | 2,632 up    |
| lmo1997        | similar to PTS mannose-specific enzyme IIA component                            | 1.2                 | CodY    | 5,834 up    |
| lmo1998        | similar to opine catabolism protein                                             | 2.1.1               | CodY    | 4,561 up    |
| lmo1999        | weakly similar to glucosamine-fructose-6-phosphate aminotransferase             | 2.1.1               | CodY    | 7,159 up    |
| lmo2001        | similar to PTS mannose-specific enzyme IIC component                            | 1.2                 | CodY    | 6,605 up    |
| lmo2137        | similar to PTS system, fructose-specific enzyme IIA component                   | 1.2                 | CodY    | 5,052 up    |
| lmo2585        | similar to B. subtilis YrhD protein                                             | 5.2                 | CodY    | 7,101 up    |
| lmo2646        |                                                                                 | 6.0                 | CodY    | 32,680 up   |
| lmo2647        | similar to creatinine amidohydrolase                                            | 2.2                 | CodY    | 53,486 up   |
| lmo2661        | similar to ribulose-5-phosphate 3-epimerase                                     | 2.1.1               | CodY    | 8,132 up    |
| lmo2662        | similar to ribose 5-phosphate epimerase                                         | 2.1.1               | CodY    | 8,669 up    |
| lmo2663        | similar to polyol dehydrogenase                                                 | 2.1.1               | CodY    | 9,744 up    |
| lmo2664        | similar to sorbitol dehydrogenase                                               | 2.1.1               | CodY    | 9,634 up    |
| lmo2666        | similar to PTS system galactitol-specific enzyme IIB component                  | 1.2                 | CodY    | 15,747 up   |
| <i>lmo0269</i> | similar to transporter                                                          | 1.2                 | CodY    | 6.234 down  |
| <i>lmo2469</i> | similar to amino acid transporter                                               | 1.2                 | CodY    | 2.302 down  |
| <i>motB</i>    | similar to motility protein (flagellar motor rotation) MotB                     | 1.5                 | CodY    | 2.007 down  |
| <i>lmo0769</i> | similar to alpha-1,6-mannanase                                                  | 2.1.1               | CodY    | 2.114 down  |
| <i>galE</i>    | UDP-glucose 4-epimerase                                                         | 2.1.1               | PrfA    | 2.292 down  |
| <i>lmo2829</i> | similar to yeast protein Frm2p involved in fatty acid signaling                 | 2.4                 | CodY    | 3.171 down  |
| <i>rpsP</i>    | ribosomal protein S16                                                           | 3.7.1               | CodY    | 2.448 down  |

|                |                                            |     |      |            |
|----------------|--------------------------------------------|-----|------|------------|
| <i>Imo0242</i> | similar to <i>B. subtilis</i> Yacp protein | 5.2 | PrfA | 2.245 down |
| <i>Imo0788</i> | hypothetical protein                       | 5.2 | PrfA | 2.743 down |
| <i>Imo2127</i> | hypothetical protein                       | 5.2 | CodY | 3.305 down |

List of genes with higher and lower transcript levels at time 30 min identified after gene ontology with ontology terms “CodY”, “PrfA”, “SigmaB” and “PrfA/SigmaB”.

| name    | description                                                                     | Functional category | Regulon | Fold change |
|---------|---------------------------------------------------------------------------------|---------------------|---------|-------------|
| argB    | highly similar to N-acetylglutamate 5-phosphotransferase                        | 2.2                 | CodY    | 4,836 up    |
| argG    | similar to argininosuccinate synthase                                           | 2.2                 | CodY    | 4,368 up    |
| argH    | similar to argininosuccinate lyase                                              | 2.2                 | CodY    | 5,981 up    |
| argJ    | highly similar to ornithine acetyltransferase and amino-acid acetyltransferases | 2.2                 | CodY    | 7,591 up    |
| Imo0022 | similar to PTS system, fructose-specific IIB component                          | 1.2                 | CodY    | 19,697 up   |
| Imo0298 | similar to PTS beta-glucoside-specific enzyme IIC component                     | 1.2                 | CodY    | 15,822 up   |
| Imo0299 | similar to PTS beta-glucoside-specific enzyme IIB component                     | 1.2                 | CodY    | 17,041 up   |
| Imo0344 | similar to dehydrogenase/reductase                                              | 2.1.1               | CodY    | 6,249 up    |
| Imo0345 | similar to sugar-phosphate isomerase                                            | 2.1.1               | CodY    | 5,345 up    |
| Imo1997 | similar to PTS mannose-specific enzyme IIA component                            | 1.2                 | CodY    | 6,082 up    |
| Imo1998 | similar to opine catabolism protein                                             | 2.1.1               | CodY    | 6,294 up    |
| Imo1999 | weakly similar to glucosamine-fructose-6-phosphate aminotransferase             | 2.1.1               | CodY    | 10,879 up   |
| Imo2001 | similar to PTS mannose-specific enzyme IIC component                            | 1.2                 | CodY    | 7,748 up    |
| Imo2137 | similar to PTS system, fructose-specific enzyme IIA component                   | 1.2                 | CodY    | 4,918 up    |
| Imo2585 | similar to <i>B. subtilis</i> YrhD protein                                      | 5.2                 | CodY    | 11,917 up   |
| Imo2646 |                                                                                 | 6.0                 | CodY    | 84,283 up   |
| Imo2647 | similar to creatinine amidohydrolase                                            | 2.2                 | CodY    | 144,279 up  |
| Imo2661 | similar to ribulose-5-phosphate 3-epimerase                                     | 2.1.1               | CodY    | 16,768 up   |
| Imo2662 | similar to ribose 5-phosphate epimerase                                         | 2.1.1               | CodY    | 13,639 up   |

|         |                                                                                    |       |              |             |
|---------|------------------------------------------------------------------------------------|-------|--------------|-------------|
| lmo2663 | similar to polyol dehydrogenase                                                    | 2.1.1 | CodY         | 21,145 up   |
| lmo2664 | similar to sorbitol dehydrogenase                                                  | 2.1.1 | CodY         | 16,266 up   |
| lmo2666 | similar to PTS system galactitol-specific enzyme IIB component                     | 1.2   | CodY         | 17,375 up   |
| plcA    | phosphatidylinositol-specific phospholipase c                                      | 2.4   | PrfA         | 3.726 down  |
| mpl     | Zinc metalloproteinase precursor                                                   | 2.2   | PrfA         | 2.851 down  |
| lmo0242 | similar to B. subtilis Yacp protein                                                | 5.2   | PrfA         | 2.980 down  |
| lmo0269 | similar to transporter                                                             | 1.2   | CodY         | 15.999 down |
| lmo0560 | similar to NADP-specific glutamate dehydrogenase                                   | 2.2   | CodY         | 3.157 down  |
| lmo0654 | hypothetical protein                                                               | 6.0   | PrfA         | 4.301 down  |
| motB    | similar to motility protein (flagellar motor rotation) MotB                        | 1.5   | CodY         | 2.073 down  |
| lmo0701 | hypothetical protein                                                               | 1.8   | CodY         | 2.132 down  |
| lmo0729 | hypothetical protein                                                               | 6.0   | CodY         | 2.180 down  |
| lmo0768 | similar to sugar ABC transporter, periplasmic sugar-binding protein                | 1.2   | CodY         | 2.649 down  |
| lmo0769 | similar to alpha-1,6-mannanase                                                     | 2.1.1 | CodY         | 2.989 down  |
| lmo0788 | hypothetical protein                                                               | 5.2   | PrfA         | 3.816 down  |
| lmo0937 | hypothetical protein                                                               | 6.0   | PrfA         | 4.352 down  |
| opuCB   | similar to glycine betaine/carnitine/choline ABC transporter (membrane protein)    | 1.2   | PrfA,Sigma B | 2.147 down  |
| opuCA   | similar to glycine betaine/carnitine/choline ABC transporter (ATP-binding protein) | 1.2   | PrfA,Sigma B | 9.492 down  |
| lmo1516 | similar to ammonium transporter NrgA                                               | 1.2   | CodY         | 2.980 down  |
| lmo1517 | similar to nitrogen regulatory PII protein                                         | 2.2   | CodY         | 3.125 down  |
| lmo1734 | similar to glutamate synthase (large subunit)                                      | 2.2   | CodY         | 2.095 down  |
| rpsP    | ribosomal protein S16                                                              | 3.7.1 | CodY         | 3.752 down  |
| lmo2127 | hypothetical protein                                                               | 5.2   | CodY         | 8.309 down  |
| lmo2219 | similar to post-translocation molecular chaperone                                  | 1.6   | PrfA         | 2.097 down  |
| lmo2469 | similar to amino acid transporter                                                  | 1.2   | CodY         | 5.495 down  |
| galE    | UDP-glucose 4-epimerase                                                            | 2.1.1 | PrfA         | 4.028 down  |
| lmo2721 | similar to glucosamine-6-phosphate isomerase                                       | 2.1.1 | CodY         | 2.589 down  |
| lmo2775 | hypothetical membrane protein                                                      | 1.2   | CodY         | 2.706 down  |
| lmo2803 | hypothetical protein                                                               | 6.0   | CodY         | 3.195 down  |

|         |                                                                 |     |      |            |
|---------|-----------------------------------------------------------------|-----|------|------------|
| lmo2829 | similar to yeast protein Frm2p involved in fatty acid signaling | 2.4 | CodY | 9.549 down |
|---------|-----------------------------------------------------------------|-----|------|------------|

List of genes with higher and lower transcript levels at time 18 h identified after gene ontology with ontology terms “CodY”,” PrfA”,” SigmaB” and”PrfA/SigmaB”

| name    | description                                                         | Functional category | Regulon | Fold change |
|---------|---------------------------------------------------------------------|---------------------|---------|-------------|
| argG    | similar to argininosuccinate synthase                               | 2.2                 | CodY    | 2,002 up    |
| lmo0022 | similar to PTS system, fructose-specific IIB component              | 1.2                 | CodY    | 4,137 up    |
| lmo0298 | similar to PTS beta-glucoside-specific enzyme IIC component         | 1.2                 | CodY    | 5,698 up    |
| lmo0299 | similar to PTS beta-glucoside-specific enzyme IIB component         | 1.2                 | CodY    | 8,432 up    |
| lmo0344 | similar to dehydrogenase/reductase                                  | 2.1.1               | CodY    | 3,672 up    |
| lmo2585 | similar to B. subtilis YrhD protein                                 | 5.2                 | CodY    | 5,771 up    |
| lmo2646 |                                                                     | 6.0                 | CodY    | 48,757 up   |
| lmo2647 | similar to creatinine amidohydrolase                                | 2.2                 | CodY    | 50,049 up   |
| lmo2661 | similar to ribulose-5-phosphate 3-epimerase                         | 2.1.1               | CodY    | 8,397 up    |
| lmo2662 | similar to ribose 5-phosphate epimerase                             | 2.1.1               | CodY    | 11,375 up   |
| lmo2663 | similar to polyol dehydrogenase                                     | 2.1.1               | CodY    | 16,199 up   |
| lmo2664 | similar to sorbitol dehydrogenase                                   | 2.1.1               | CodY    | 9,926 up    |
| lmo2666 | similar to PTS system galactitol-specific enzyme IIB component      | 1.2                 | CodY    | 7,420 up    |
| lmo2659 | similar to ribulose-phosphate 3-epimerase                           | 2.1.1               | CodY    | 2,349 up    |
| lmo2660 | similar to transketolase                                            | 2.1.1               | CodY    | 3,527 up    |
| lmo0269 | similar to transporter                                              | 1.2                 | CodY    | 19.905 down |
| lmo0768 | similar to sugar ABC transporter, periplasmic sugar-binding protein | 1.2                 | CodY    | 5.303 down  |
| lmo1516 | similar to ammonium transporter NrgA                                | 1.2                 | CodY    | 10.918 down |
| lmo1652 | similar to ABC transporter (ATP-binding protein)                    | 1.2                 | CodY    | 2.067 down  |
| lmo2097 | similar to PTS system galactitol-specific enzyme IIB component      | 1.2                 | CodY    | 4.027 down  |
| lmo2469 | similar to amino acid transporter                                   | 1.2                 | CodY    | 6.557 down  |
| lmo2775 | hypothetical membrane protein                                       | 1.2                 | CodY    | 2.098 down  |
| motB    | similar to motility protein (flagellar motor rotation) MotB         | 1.5                 | CodY    | 3.299 down  |

|         |                                                                                              |       |      |             |
|---------|----------------------------------------------------------------------------------------------|-------|------|-------------|
| lmo0707 | similar to flagellar hook-associated protein 2 FlID                                          | 1.5   | CodY | 4.217 down  |
| lmo0708 | similar to hypothetical flagellar protein                                                    | 1.5   | CodY | 2.271 down  |
| lmo0710 | similar to flagellar basal-body rod protein flgB                                             | 1.5   | CodY | 2.375 down  |
| lmo0712 | similar to flagellar hook-basal body complex protein FlIE                                    | 1.5   | CodY | 2.561 down  |
| lmo0713 | similar to flagellar basal-body M-ring protein flIF                                          | 1.5   | CodY | 2.548 down  |
| lmo0714 | similar to flagellar motor switch protein flIG                                               | 1.5   | CodY | 2.016 down  |
| lmo0701 | hypothetical protein                                                                         | 1.8   | CodY | 6.617 down  |
| lmo1799 | putative peptidoglycan bound protein (LPXTG motif)                                           | 1.8   | CodY | 3.006 down  |
| lmo0769 | similar to alpha-1,6-mannanase                                                               | 2.1.1 | CodY | 7.872 down  |
| lmo0813 | similar to fructokinases                                                                     | 2.1.1 | CodY | 2.017 down  |
| lmo2721 | similar to glucosamine-6-phosphate isomerase                                                 | 2.1.1 | CodY | 2.622 down  |
| lmo0359 | similar to D-fructose-1,6-biphosphate aldolase                                               | 2.1.2 | CodY | 3.683 down  |
| lmo0458 | similar to hydantoinase                                                                      | 2.2   | CodY | 7.420 down  |
| lmo0560 | similar to NADP-specific glutamate dehydrogenase                                             | 2.2   | CodY | 11.762 down |
| hisF    | highly similar to cyclase HisF                                                               | 2.2   | CodY | 4.101 down  |
| hisA    | highly similar to phosphoribosylformimino-5-aminoimidazole<br>carboxamide ribotide isomerase | 2.2   | CodY | 4.625 down  |
| hisH    | similar to amidotransferases                                                                 | 2.2   | CodY | 2.737 down  |
| hisB    | imidazoleglycerol-phosphate dehydratase                                                      | 2.2   | CodY | 5.321 down  |
| hisD    | highly similar to histidinol dehydrogenases                                                  | 2.2   | CodY | 4.868 down  |
| hisG    | similar to ATP phosphoribosyltransferase                                                     | 2.2   | CodY | 4.459 down  |
| lmo1517 | similar to nitrogen regulatory PII protein                                                   | 2.2   | CodY | 10.387 down |
| trpD    | highly similar to anthranilate phosphoribosyltransferase                                     | 2.2   | CodY | 2.675 down  |
| lmo1733 | similar to glutamate synthase (small subunit)                                                | 2.2   | CodY | 2.995 down  |
| lmo1734 | similar to glutamate synthase (large subunit)                                                | 2.2   | CodY | 4.560 down  |
| lmo2829 | similar to yeast protein Frm2p involved in fatty acid signaling                              | 2.4   | CodY | 9.362 down  |
| lmo1196 | similar to precorrin decarbocylase                                                           | 2.5   | CodY | 7.249 down  |
| rpsP    | ribosomal protein S16                                                                        | 3.7.1 | CodY | 5.820 down  |
| lmo0422 | similar to unknown protein                                                                   | 5.2   | CodY | 3.241 down  |
| lmo1649 | hypothetical protein                                                                         | 5.2   | CodY | 4.108 down  |
| lmo2127 | hypothetical protein                                                                         | 5.2   | CodY | 11.794 down |

|         |                                                                                               |     |                 |             |
|---------|-----------------------------------------------------------------------------------------------|-----|-----------------|-------------|
| lmo0687 | hypothetical protein                                                                          | 6.0 | CodY            | 5.893 down  |
| lmo0702 | hypothetical protein                                                                          | 6.0 | CodY            | 3.474 down  |
| lmo0709 | hypothetical protein                                                                          | 6.0 | CodY            | 2.549 down  |
| lmo0715 | flagellar assembly protein H                                                                  | 6.0 | CodY            | 2.222 down  |
| lmo0729 | hypothetical protein                                                                          | 6.0 | CodY            | 14.208 down |
| lmo2803 | hypothetical protein                                                                          | 6.0 | CodY            | 13.163 down |
| lmo2804 | hypothetical protein                                                                          | 6.0 | CodY            | 5.132 down  |
| lmo0169 | similar to a glucose uptake protein                                                           | 1.2 | PrfA,Sigma<br>B | 6.332 down  |
| lmo0781 | similar to mannose-specific phosphotransferase system (PTS) component IID                     | 1.2 | PrfA,Sigma<br>B | 4.114 down  |
| opuCD   | similar to betaine/carnitine/choline ABC transporter (membrane p)                             | 1.2 | PrfA,Sigma<br>B | 3.017 down  |
| opuCC   | similar to glycine betaine/carnitine/choline ABC transporter (osmoprotectant-binding protein) | 1.2 | PrfA,Sigma<br>B | 2.095 down  |
| opuCB   | similar to glycine betaine/carnitine/choline ABC transporter (membrane protein)               | 1.2 | PrfA,Sigma<br>B | 4.858 down  |
| opuCA   | similar to glycine betaine/carnitine/choline ABC transporter (ATP-binding protein)            | 1.2 | PrfA,Sigma<br>B | 15.392 down |
| lmo0676 | similar to flagellar biosynthetic protein FlIP                                                | 1.5 | PrfA,Sigma<br>B | 2.740 down  |
| lmo2067 | similar to conjugated bile acid hydrolase                                                     | 4.2 | PrfA,Sigma<br>B | 2.048 down  |
| lmo0439 | weakly similar to a module of peptide synthetase                                              | 4.5 | PrfA,Sigma<br>B | 3.765 down  |
| lmo0796 | conserved hypothetical protein                                                                | 5.2 | PrfA,Sigma<br>B | 3.355 down  |
| lmo2231 | similar to unknown proteins                                                                   | 5.2 | PrfA,Sigma<br>B | 2.740 down  |
| lmo2570 | hypothetical protein                                                                          | 5.2 | PrfA,Sigma<br>B | 2.515 down  |
| lmo1261 | hypothetical protein                                                                          | 6.0 | PrfA,Sigma<br>B | 2.920 down  |

|         |                                                                                                                     |     |        |             |
|---------|---------------------------------------------------------------------------------------------------------------------|-----|--------|-------------|
| iap     | P60 extracellular protein, invasion associated protein iap                                                          | 1.1 | SigmaB | 20.543 down |
| mreD    | similar to cell-shape determining protein MreD                                                                      | 1.1 | SigmaB | 5.227 down  |
| pbpB    | similar to penicillin-binding protein 2B                                                                            | 1.1 | SigmaB | 2.619 down  |
| spl     | peptidoglycan lytic protein P45                                                                                     | 1.1 | SigmaB | 10.045 down |
| lmo2554 | similar to galactosyltransferase                                                                                    | 1.1 | SigmaB | 4.995 down  |
| lmo0405 | similar to phosphate transport protein                                                                              | 1.2 | SigmaB | 2.713 down  |
| lmo0593 | similar to transport proteins (formate?)                                                                            | 1.2 | SigmaB | 3.349 down  |
| lmo0738 | similar to phosphotransferase system (PTS) beta-glucoside-specific enzyme IIABC component                           | 1.2 | SigmaB | 3.892 down  |
| lmo1421 | similar to glycine betaine/carnitine/choline ABC transporter (ATP-binding protein)                                  | 1.2 | SigmaB | 3.600 down  |
| lmo1422 | similar to glycine betaine/carnitine/choline ABC transporter (membrane protein)                                     | 1.2 | SigmaB | 2.028 down  |
| lmo1424 | similar to manganese transport proteins NRAMP                                                                       | 1.2 | SigmaB | 2.292 down  |
| lmo1431 | similar to ABC transporter (ATP-binding protein)                                                                    | 1.2 | SigmaB | 12.551 down |
| lmo1724 | similar to ABC transporter, ATP-binding protein                                                                     | 1.2 | SigmaB | 23.030 down |
| lmo1746 | similar to ABC transporter (permease)                                                                               | 1.2 | SigmaB | 6.635 down  |
| lmo1847 | similar to adhesion binding proteins and lipoproteins with multiple specificity for metal cations (ABC transporter) | 1.2 | SigmaB | 4.733 down  |
| lmo1848 | similar metal cations ABC transporter (permease protein)                                                            | 1.2 | SigmaB | 2.933 down  |
| lmo1849 | similar to metal cations ABC transporter, ATP-binding proteins                                                      | 1.2 | SigmaB | 2.237 down  |
| lmo1875 | similar to putative ABC transporters (ATP-binding protein)                                                          | 1.2 | SigmaB | 5.928 down  |
| lmo2062 | similar to copper export proteins                                                                                   | 1.2 | SigmaB | 29.505 down |
| lmo2192 | similar to oligopeptide ABC transporter (ATP-binding protein)                                                       | 1.2 | SigmaB | 3.443 down  |
| lmo2194 | similar to oligopeptide ABC transporter (permease)                                                                  | 1.2 | SigmaB | 3.381 down  |
| lmo2371 | similar to putative ABC-transporter transmembrane subunit                                                           | 1.2 | SigmaB | 7.968 down  |
| lmo2429 | similar to B. subtilis ferrichrome ABC transporter (ATP-binding protein) FhuC                                       | 1.2 | SigmaB | 3.391 down  |
| lmo2463 | similar to transport protein                                                                                        | 1.2 | SigmaB | 3.712 down  |
| lmo2777 | similar to efflux protein                                                                                           | 1.2 | SigmaB | 8.584 down  |
| lmo2451 | similar to preprotein translocase subunit SecG                                                                      | 1.6 | SigmaB | 4.586 down  |
| secA    | translocase binding subunit (ATPase)                                                                                | 1.6 | SigmaB | 3.748 down  |

|         |                                                                            |       |        |             |
|---------|----------------------------------------------------------------------------|-------|--------|-------------|
| lmo1071 | similar to cell-division protein RodA and FtsW                             | 1.7   | SigmaB | 10.246 down |
| minD    | highly similar to cell division inhibitor (septum placement) protein MinD  | 1.7   | SigmaB | 4.413 down  |
| ftsZ    | highly similar to cell-division initiation protein FtsZ                    | 1.7   | SigmaB | 3.015 down  |
| divIB   | similar to cell-division initiation protein divIB                          | 1.7   | SigmaB | 6.492 down  |
| ftsL    | similar to cell-division protein FtsL                                      | 1.7   | SigmaB | 66.299 down |
| ftsX    | highly similar to cell-division protein FtsX                               | 1.7   | SigmaB | 5.700 down  |
| ftsE    | highly similar to the cell-division ATP-binding protein FtsE               | 1.7   | SigmaB | 4.567 down  |
| lmo1086 | similar to CDP-ribitol pyrophosphorylase                                   | 2.1   | SigmaB | 5.814 down  |
| lmo0529 | conserved hypothetical protein similar to putative glucosaminyltransferase | 2.1.1 | SigmaB | 3.532 down  |
| lmo0554 | similar to NADH-dependent butanol dehydrogenase                            | 2.1.1 | SigmaB | 2.488 down  |
| lmo0669 | similar to oxidoreductase                                                  | 2.1.1 | SigmaB | 2.779 down  |
| lmo0739 | similar to 6-phospho-beta-glucosidase                                      | 2.1.1 | SigmaB | 21.550 down |
| lmo0811 | similar to carbonic anhydrase                                              | 2.1.1 | SigmaB | 2.916 down  |
| ackA    | highly similar to acetate kinase                                           | 2.1.1 | SigmaB | 4.200 down  |
| lmo1818 | similar to ribulose-5-phosphate 3-epimerase                                | 2.1.1 | SigmaB | 10.596 down |
| lmo2475 | similar to phosphomannomutase and phosphoglucomutase                       | 2.1.1 | SigmaB | 7.829 down  |
| lmo2712 | highly similar to gluconate kinase                                         | 2.1.1 | SigmaB | 2.042 down  |
| lmo1375 | similar to aminotripeptidase                                               | 2.2   | SigmaB | 9.213 down  |
| lmo1585 | similar to proteases                                                       | 2.2   | SigmaB | 16.129 down |
| lmo1681 | similar to cobalamin-independent methionine synthase                       | 2.2   | SigmaB | 5.082 down  |
| hom     | highly similar to homoserine dehydrogenase                                 | 2.2   | SigmaB | 21.543 down |
| lmo0218 | polyribonucleotide nucleotidyltransferase domain present                   | 2.3   | SigmaB | 6.685 down  |
| rncS    | similar to ribonuclease III                                                | 2.3   | SigmaB | 11.539 down |
| lmo0970 | similar to enoyl- acyl-carrier protein reductase                           | 2.4   | SigmaB | 6.227 down  |
| lmo1647 | similar to 1-acylglycerol-3-phosphate O-acyltransferases                   | 2.4   | SigmaB | 12.443 down |
| fabD    | similar to malonyl CoA-acyl carrier protein transacylase                   | 2.4   | SigmaB | 6.883 down  |
| lmo2201 | similar to 3-oxoacyl-acyl-carrier protein synthase                         | 2.4   | SigmaB | 2.994 down  |
| lmo2450 | similar to carboxylesterase                                                | 2.4   | SigmaB | 3.847 down  |
| lmo2503 | similar to cardiolipin synthase                                            | 2.4   | SigmaB | 4.800 down  |
| tkkB    | similar to D-1-deoxyxylulose 5-phosphate synthase                          | 2.5   | SigmaB | 5.336 down  |



|         |                                                                                           |       |        |             |
|---------|-------------------------------------------------------------------------------------------|-------|--------|-------------|
| menF    | similar to menaquinone-specific isochorismate synthase                                    | 2.5   | SigmaB | 4.604 down  |
| lmo1677 | similar to menaquinone biosynthesis proteins                                              | 2.5   | SigmaB | 16.675 down |
| lmo2542 | similar to protoporphyrinogen oxidase                                                     | 2.5   | SigmaB | 2.997 down  |
| lmo2641 | similar to heptaprenyl diphosphate synthase component II                                  | 2.5   | SigmaB | 3.088 down  |
| dnaE    | highly similar to DNA polymerase III (alpha subunit) DnaE                                 | 3.1   | SigmaB | 3.782 down  |
| parC    | highly similar to DNA gyrase-like protein (subunit A)                                     | 3.4   | SigmaB | 2.360 down  |
| lmo1606 | similar to DNA translocase                                                                | 3.4   | SigmaB | 6.830 down  |
| smc     | similar to Smc protein essential for chromosome condensation and partition                | 3.4   | SigmaB | 2.918 down  |
| lmo2334 | similar to transcriptional regulator                                                      | 3.5.2 | SigmaB | 47.450 down |
| lmo2494 | similar to negative regulator of phosphate regulon                                        | 3.5.2 | SigmaB | 2.912 down  |
| lmo1450 | similar to ATP-dependent RNA helicase, DEAD-box family (deaD)                             | 3.5.3 | SigmaB | 4.676 down  |
| lmo1496 | similar to transcription elongation factor GreA                                           | 3.5.3 | SigmaB | 11.797 down |
| tsf     | translation elongation factor                                                             | 3.5.3 | SigmaB | 4.335 down  |
| lmo2560 | similar to B. subtilis RNA polymerase delta subunit                                       | 3.5.3 | SigmaB | 3.257 down  |
| lmo1359 | similar to transcription termination protein (NusB)                                       | 3.5.4 | SigmaB | 6.154 down  |
| lmo2244 | similar to putative ribosomal large subunit pseudouridine synthase                        | 3.6   | SigmaB | 6.672 down  |
| rpsT    | ribosomal protein S20                                                                     | 3.7.1 | SigmaB | 7.470 down  |
| rpsD    | ribosomal protein S4                                                                      | 3.7.1 | SigmaB | 5.605 down  |
| rpsI    | ribosomal protein S9                                                                      | 3.7.1 | SigmaB | 5.217 down  |
| lysS    | lysyl-tRNA synthetase                                                                     | 3.7.2 | SigmaB | 2.244 down  |
| alaS    | alanyl-tRNA synthetase                                                                    | 3.7.2 | SigmaB | 9.227 down  |
| hisS    | histidyl-tRNA synthetase                                                                  | 3.7.2 | SigmaB | 11.362 down |
| infC    | translation initiation factor IF-3                                                        | 3.7.3 | SigmaB | 2.363 down  |
| frr     | highly similar to ribosome recycling factors                                              | 3.7.5 | SigmaB | 6.758 down  |
| lmo1433 | similar to glutathione reductase                                                          | 4.1   | SigmaB | 2.659 down  |
| lmo1601 | similar to general stress protein                                                         | 4.1   | SigmaB | 2.250 down  |
| kat     | catalase                                                                                  | 4.2   | SigmaB | 3.124 down  |
| lmo0190 | similar to B. subtilis YabH protein                                                       | 5.2   | SigmaB | 5.057 down  |
| lmo0590 | similar to a fusion of two types of conserved hypothetical protein conserved hypothetical | 5.2   | SigmaB | 4.468 down  |

|         |                                            |     |        |             |
|---------|--------------------------------------------|-----|--------|-------------|
| lmo0591 | similar to unknown membrane proteins       | 5.2 | SigmaB | 2.737 down  |
| lmo0663 | conserved hypothetical proteins            | 5.2 | SigmaB | 2.734 down  |
| lmo0670 | hypothetical protein                       | 5.2 | SigmaB | 2.305 down  |
| lmo0911 | hypothetical protein                       | 5.2 | SigmaB | 2.785 down  |
| lmo1351 | hypothetical protein                       | 5.2 | SigmaB | 3.082 down  |
| lmo1358 | similar to B. subtilis YqhY protein        | 5.2 | SigmaB | 3.698 down  |
| lmo1440 | similar to unknown proteins                | 5.2 | SigmaB | 36.429 down |
| lmo1456 | similar to unknown proteins                | 5.2 | SigmaB | 2.685 down  |
| lmo1488 | similar to unknown proteins                | 5.2 | SigmaB | 7.557 down  |
| lmo1526 | similar to unknown proteins                | 5.2 | SigmaB | 2.440 down  |
| lmo1776 | similar to unknown protein                 | 5.2 | SigmaB | 10.284 down |
| lmo1814 | similar to unknown proteins                | 5.2 | SigmaB | 5.081 down  |
| lmo1937 | similar to unknown protein                 | 5.2 | SigmaB | 5.792 down  |
| lmo2048 | similar to unknown proteins                | 5.2 | SigmaB | 11.670 down |
| lmo2245 | similar to unknown proteins                | 5.2 | SigmaB | 5.069 down  |
| lmo2254 | similar to unknown proteins                | 5.2 | SigmaB | 14.388 down |
| lmo2386 | similar to B. subtilis YuiD protein        | 5.2 | SigmaB | 4.031 down  |
| lmo2387 | conserved hypothetical protein             | 5.2 | SigmaB | 3.014 down  |
| lmo2508 | similar to conserved hypothetical proteins | 5.2 | SigmaB | 2.489 down  |
| lmo2553 | conserved hypothetical protein             | 5.2 | SigmaB | 4.530 down  |
| lmo2562 | hypothetical protein                       | 5.2 | SigmaB | 11.772 down |
| lmo2603 | hypothetical protein                       | 5.2 | SigmaB | 2.805 down  |
| lmo2634 | similar to B. subtilis YbaF protein        | 5.2 | SigmaB | 3.318 down  |
| lmo0647 | hypothetical protein                       | 6.0 | SigmaB | 3.461 down  |
| lmo0819 | hypothetical protein                       | 6.0 | SigmaB | 2.666 down  |
| lmo1752 | hypothetical protein                       | 6.0 | SigmaB | 7.923 down  |
| lmo2710 | hypothetical protein                       | 6.0 | SigmaB | 11.428 down |
