# Supplementary material for: Changes in Gene Expression during Adaptation of Listeria monocytogenes to the Soil Environment
Source: PubMed Central journal article supplement (PMC3179493; doi:10.1371/journal.pone.0024881), 2011-09-23
Supplement: pone.0024881.s008.pdf [file pone.0024881.s008.pdf]

Table S8. Transcript levels of the major virulence-associated genes and internalin family.

| name           | description                                                                        | Functional category | Fold change TA 15 min | Fold change TA 30 min | Fold change TA 18 h | Regulon          |
|----------------|------------------------------------------------------------------------------------|---------------------|-----------------------|-----------------------|---------------------|------------------|
| <i>prfA</i>    | listeriolysin positive regulatory protein                                          | 3.5.2               | 1.75 up               | 1.38 down             | 2.25 down           | PrfA, $\sigma$ B |
| <i>plcA</i>    | phosphatidylinositol-specific phospholipase c                                      | 2.4                 | 1.80 down             | 3.72 down             | 3.35 down           | PrfA             |
| <i>hly</i>     | listeriolysin O precursor                                                          | 4.5                 | 1.21 down             | 1.66 down             | 3.51 down           | PrfA, $\sigma$ B |
| <i>mpl</i>     | Zinc metalloproteinase precursor                                                   | 2.2                 | 1.92 down             | 2.85 down             | -----               | PrfA             |
| <i>actA</i>    | actin-assembly inducing protein precursor                                          | 1.8                 | 1.52 down             | 1.83 down             | 5.81 down           | PrfA             |
| <i>plcB</i>    | phospholipase C                                                                    | 2.4                 | 1.34 down             | 1.95 down             | 1.90 down           | PrfA, $\sigma$ B |
| <i>inlA</i>    | Internalin A                                                                       | 1.8                 | 1.54 up               | 1.65 up               | 1.41 down           | PrfA, $\sigma$ B |
| <i>inlB</i>    | Internalin B                                                                       | 1.8                 | 2.61 up               | 1.49 up               | 1.51 down           | PrfA, $\sigma$ B |
| <i>inlC</i>    | internalin C                                                                       | 1.9                 | 1.33 up               | 1.20 down             | 3.60 down           | PrfA             |
| <i>inlE</i>    | internalin E                                                                       | 1.8                 | 1.59 up               | 1.14 down             | 1.42 down           |                  |
| <i>inlG</i>    | internalin G                                                                       | 1.8                 | 2.38 down             | 3.87 down             | 4.71 down           |                  |
| <i>inlH</i>    | internalin H                                                                       | 1.8                 | 1.12 up               | 1.10 down             | 1.24 up             | PrfA, $\sigma$ B |
| <i>iap</i>     | P60 extracellular protein. invasion associated protein                             | 1.1                 | 4.70 down             | 6.77 down             | 20.54 down          | $\sigma$ B       |
| <i>kat</i>     | catalase                                                                           | 4.2                 | 1.22 down             | 2.11 down             | 3.12 down           | $\sigma$ B       |
| <i>sod</i>     | superoxide dismutase                                                               | 4.2                 | 1.05 down             | 1.23 down             | 2.79 down           |                  |
| <i>lmo0171</i> | similar to internalin proteins. putative peptidoglycan bound protein (LPXTG motif) | 1.8                 | 1.26 up               | 1.31 down             | 3.77 down           |                  |
| <i>lmo0327</i> | Similar to cell surface proteins (LPXTG motif)                                     | 1.8                 | 2.15 down             | 2.84 down             | 2.96 down           |                  |
| <i>lmo0331</i> | similar to internalin. putative peptidoglycan bound protein (LPXTG motif)          | 1.8                 | 1.58 down             | 2.97 down             | 5.81 down           | $\sigma$ B       |
| <i>lmo0333</i> | similar to internalin proteins. putative peptidoglycan bound protein (LPXTG motif) | 1.8                 | 2.30 down             | 7.40 down             | 6.88 down           |                  |
| <i>lmo0409</i> | similar to internalin. peptidoglycan bound protein (LPxTG motif)                   | 1.8                 | 1.44 down             | 2.67 down             | 5.09 down           |                  |
| <i>lmo0514</i> | similar to internalin protein. putative peptidoglycan bound protein (LPXTG motif)  | 1.8                 | 12.52 down            | 27.49 down            | 5.89 down           |                  |
| <i>lmo0549</i> | similar to internalin protein                                                      | 1.9                 | 2.37 down             | 6.21 down             | 4.16 down           |                  |
| <i>lmo0610</i> | similar to internalin proteins. putative peptidoglycan bound protein (LPXTG motif) | 1.8                 | ----                  | 1.23 down             | 1.07 down           | $\sigma$ B       |
| <i>lmo0801</i> | similar to internalin. putative peptidoglycan bound protein (LPXTG motif)          | 1.8                 | 2.11 down             | 4.34 down             | 4.79 down           |                  |
| <i>lmo1136</i> | similar to internalin. putative peptidoglycan bound protein (LPXTG motif)          | 1.8                 | 4.21 down             | 8.92 down             | 5.64 down           |                  |
| <i>lmo1289</i> | similar to internalin proteins. putative peptidoglycan bound protein (LPXTG motif) | 1.8                 | 1.55 up               | 1.04 up               | 1.19 down           |                  |
| <i>lmo1290</i> | similar to internalin proteins. putative peptidoglycan bound protein (LPXTG motif) | 1.8                 | 1.05 down             | 1.37 down             | 3.61 down           |                  |
| <i>lmo2027</i> | putative cell surface protein. similar to internalin proteins                      | 1.9                 | 1.08 down             | 1.94 down             | 1.48 down           |                  |
| <i>lmo2203</i> | similar to N-acetylmuramoyl-L-alanine amidase and to internalin B                  | 1.8                 | 2.94 down             | 5.01 down             | 4.16 down           |                  |

|                |                                                                                       |       |            |            |            |                                                |
|----------------|---------------------------------------------------------------------------------------|-------|------------|------------|------------|------------------------------------------------|
| <i>lmo2396</i> | similar to internalin proteins. putative peptidoglycan bound protein (LPXTG motif)    | 1.8   | 2.07 down  | 2.83 down  | 3.61 down  |                                                |
| <i>lmo2445</i> | similar to internalin                                                                 | 1.8   | 1.12 down  | 1.35 down  | 1.39 down  |                                                |
| <i>lmo2470</i> | similar to internalin proteins                                                        | 1.9   | 1.30 up    | 1.15 up    | 1.50 up    |                                                |
| <i>lmo2821</i> | similar to internalin. Unknown. putative peptidoglycan bound protein (LPXTG motif)    | 1.8   | 1.03 down  | 1.25 down  | 53.30 down |                                                |
| <i>lmo2115</i> | similar to ABC transporter (permease)                                                 | 1.2   | 3.89 down  | 6.67 down  | 7.27 down  | VirR, $\sigma$ B, $\sigma$ L                   |
| <i>lmo2114</i> | similar to ABC transporter (ATP-binding protein)                                      | 1.2   | 4.99 down  | 5.57 down  | 5.23 down  | VirR, $\sigma$ B, $\sigma$ H, $\sigma$ L, CtsR |
| <i>dltA</i>    | D-alanine-activating enzyme (dae), D-alanine-D-alanyl carrier protein ligase (dcl)    | 1.1   | 2.33 down  | 3.46 down  | 7.1 down   | VirR                                           |
| <i>dltB</i>    | DltB protein for D-alanine esterification of lipoteichoic acid and wall teichoic acid | 1.1   | 1.88 down  | 3.79 down  | 3.47 down  | VirR                                           |
| <i>dltC</i>    | D-alanyl carrier protein                                                              | 1.1   | 1.87 down  | 2.98 down  | 13.91 down | VirR                                           |
| <i>dltD</i>    | DltD protein for D-alanine esterification of lipoteichoic acid and wall teichoic acid | 1.1   | 1.72 down  | 2.74 down  | 5.48 down  | VirR                                           |
| <i>lmo1695</i> | similar to putative membrane proteins                                                 | 5.2   | 2.27 down  | 3.21 down  | 5.76 down  | VirR                                           |
| <i>lmo1696</i> | similar to unknown proteins                                                           | 5.2   | 7.54 down  | 22.17 down | 21.41 down | VirR                                           |
| <i>lmo2177</i> | similar to unknown protein                                                            | 5.2   | 2.99 down  | 4.71 down  | 5.23 down  | VirR, $\sigma$ L                               |
| <i>lmo0604</i> | similar to B. subtilis YvlA protein                                                   | 5.2   | 5.63 down  | 7.89 down  | 6.60 down  | VirR                                           |
| <i>lmo2439</i> | hypothetical protein                                                                  | 5.2   | 2.187 down | 4.66 down  | 8.01 down  | VirR                                           |
| <i>lmo2156</i> | hypothetical protein                                                                  | 5.1   | 22.39 down | 19.91 down | 20.62 down | VirR                                           |
| <i>virR</i>    | similar to two-component response regulator                                           | 3.5.2 | 1.61 down  | 2.93 down  | 4.97 down  | VirR                                           |
| <i>lmo1744</i> | similar to unknown proteins                                                           | 5.2   | 2.39 down  | 6.07 down  | 14.68 down | VirR                                           |
| <i>lmo1743</i> | hypothetical protein                                                                  | 6.0   | 2.23 down  | 4.08 down  | 5.79 down  | VirR                                           |
| <i>adeC</i>    | highly similar to adenine deaminases                                                  | 2.3   | 2.35 down  | 3.46 down  | 5.16 down  | VirR                                           |
| <i>virS</i>    | similar to two-component sensor histidine kinase                                      | 1.3   | 1.08 down  | 1.399 down | 3.201 down | VirR                                           |
