# Supplementary material for: Changes in Gene Expression during Adaptation of Listeria monocytogenes to the Soil Environment
Source: PubMed Central journal article supplement (PMC3179493; doi:10.1371/journal.pone.0024881), 2011-09-23
Supplement: pone.0024881.s009.pdf [file pone.0024881.s009.pdf]

Table S9. Differences of gene expression during incubation in compost-amended (DA) and control (TA) soil extract.

### 15 min Incubation

| name           | description                                               | Functional category | Fold change TA vs T0 | Fold change DA vs T0 | Fold change DA vs TA |
|----------------|-----------------------------------------------------------|---------------------|----------------------|----------------------|----------------------|
| <i>lmo0834</i> | hypothetical protein                                      | 5.1                 | 5.139 down           | 11.215 down          | 2.182 down           |
| <i>lmo0835</i> | putative peptidoglycan bound protein (LPXTG motif)        | 1.8                 | 4.256 down           | 8.832 down           | 2.075 down           |
| <i>lmo1333</i> | similar to <i>B. subtilis</i> YqzC protein                | 5.2                 | 1.964 down           | 4.319 down           | 2.198 down           |
| <i>lmo1623</i> | similar to unknown proteins                               | 5.2                 | 2.053 down           | 5.023 down           | 2.452 down           |
| <i>zurR</i>    | transcriptional regulator ZurR (ferric uptake regulation) | 3.5.2               | 2.219 down           | 5.442 down           | 2.445 down           |

### 30 min Incubation

| name           | description                                                        | Functional category | Fold change TA vs T0 | Fold change DA vs T0 | Fold change DA vs TA |
|----------------|--------------------------------------------------------------------|---------------------|----------------------|----------------------|----------------------|
| <i>cspB</i>    | similar to major cold-shock protein                                | 4.1                 | 2.181 down           | 1.023 down           | 2.131 up             |
| <i>kdpA</i>    | highly similar to potassium-transporting atpase a chain            | 1.2                 | 2.860 up             | 1.190 up             | 2.403 down           |
| <i>kdpB</i>    | potassium-transporting atpase b chain                              | 1.2                 | 2.615 up             | 1.209 up             | 2.162 down           |
| <i>lmo0028</i> | similar to <i>E. coli</i> microcin C7 self-immunity protein (MccF) | 4.5                 | 2.508 down           | 1.234 down           | 2.032 up             |
| <i>lmo0270</i> | hypothetical protein                                               | 6.0                 | 1.024 up             | 2.117 up             | 2.067 up             |
| <i>lmo0271</i> | highly similar to phospho-beta-glucosidase                         | 2.1.1               | 1.283 down           | 1.563 up             | 2.006 up             |
| <i>lmo0353</i> | similar to unknown proteins                                        | 5.2                 | 1.843 down           | 1.421 up             | 2.621 up             |
| <i>lmo0449</i> | hypothetical protein                                               | 5.1                 | 12.737 down          | 5.914 down           | 2.153 up             |
| <i>lmo0574</i> | similar to beta-glucosidase                                        | 2.1.1               | 1.440 down           | 1.736 up             | 2.501 up             |
| <i>lmo0575</i> | similar to transcription regulator GntR family                     | 3.5.2               | 2.824 down           | 1.150 down           | 2.455 up             |
| <i>lmo0602</i> | weakly similar to transcription regulator                          | 3.5.2               | 1.856 up             | 4.190 up             | 2.256 up             |
| <i>lmo0800</i> | similar to <i>B. subtilis</i> YqkB protein                         | 5.2                 | 1.558 down           | 1.290 up             | 2.011 up             |
| <i>lmo0850</i> | hypothetical protein                                               | 6.0                 | 12.029 down          | 4.912 down           | 2.448 up             |
| <i>lmo0901</i> | similar to PTS system, cellobiose-specific IIC component           | 1.2                 | 3.590 down           | 2.087 up             | 7.495 up             |
| <i>lmo0902</i> | similar to transcription regulator (GntR family)                   | 3.5.2               | 3.689 down           | 1.559 down           | 2.366 up             |
| <i>lmo0932</i> | conserved hypothetical protein                                     | 5.2                 | 2.077 down           | 1.003 up             | 2.085 up             |
| <i>lmo0937</i> | hypothetical protein                                               | 6.0                 | 4.352 down           | 1.879 down           | 2.315 up             |
| <i>lmo1516</i> | similar to ammonium transporter NrgA                               | 1.2                 | 2.980 down           | 6.513 down           | 2.185 down           |
| <i>lmo1517</i> | similar to nitrogen regulatory PII protein                         | 2.2                 | 3.125 down           | 6.582 down           | 2.105 down           |
| <i>lmo1779</i> | hypothetical protein                                               | 6.0                 | 22.031 down          | 10.238 down          | 2.151 up             |
| <i>lmo1798</i> | similar to unknown protein                                         | 5.2                 | 1.065 down           | 2.112 up             | 2.250 up             |
| <i>lmo1841</i> | hypothetical protein                                               | 6.0                 | 20.478 down          | 10.183 down          | 2.010 up             |
| <i>lmo1919</i> | similar to unknown proteins                                        | 5.2                 | 5.457 down           | 2.701 down           | 2.019 up             |
| <i>lmo2176</i> | similar to transcriptional regulator (tetR family)                 | 3.5.2               | 2.722 down           | 1.287 down           | 2.114 up             |
| <i>lmo2257</i> | hypothetical CDS                                                   | 6.0                 | 1.573 down           | 1.452 up             | 2.284 up             |
| <i>lmo2765</i> | similar to PTS cellobiose-specific enzyme IIA                      | 1.2                 | 2.263 down           | 1.016 up             | 2.300 up             |
| <i>lmo2816</i> | similar to transport protein                                       | 1.2                 | 9.502 up             | 4.300 up             | 2.209 down           |

### 18 h Incubation

| name           | description                              | Functional category | Fold change TA vs T0 | Fold change DA vs T0 | Fold change DA vs TA |
|----------------|------------------------------------------|---------------------|----------------------|----------------------|----------------------|
| <i>atpI</i>    | highly similar to ATP synthase subunit i | 1.4                 | 3.811 down           | 8.110 down           | 2.127 down           |
| <i>lmo0342</i> | similar to transketolase                 | 2.1.2               | 1.508 up             | 3.677 up             | 2.438 up             |
| <i>lmo0343</i> | similar to transaldolase                 | 2.1.2               | 1.558 up             | 3.708 up             | 2.380 up             |
| <i>lmo0344</i> | similar to dehydrogenase/reductase       | 2.1.1               | 3.672 up             | 9.234 up             | 2.514 up             |
| <i>lmo0345</i> | similar to sugar-phosphate isomerase     | 2.1.1               | 1.528 up             | 3.468 up             | 2.269 up             |

|                |                                                                                          |       |             |            |          |
|----------------|------------------------------------------------------------------------------------------|-------|-------------|------------|----------|
| <i>lmo0735</i> | similar to Ribulose-5-Phosphate 3-Epimerase                                              | 2.1.1 | 1.208 down  | 1.973 up   | 2.385 up |
| <i>lmo0736</i> | similar to ribose 5-phosphate isomerase                                                  | 2.1.1 | 1.369 down  | 2.203 up   | 3.016 up |
| <i>lmo0737</i> | hypothetical protein                                                                     | 5.2   | 1.129 up    | 3.132 up   | 2.773 up |
| <i>lmo0738</i> | similar to phosphotransferase system (PTS) beta-glucoside-specific enzyme IIBC component | 1.2   | 3.892 down  | 1.685 down | 2.309 up |
| <i>lmo0901</i> | similar to PTS system, cellobiose-specific IIC component                                 | 1.2   | 2.955 down  | 1.289 down | 2.291 up |
| <i>lmo0985</i> | hypothetical protein                                                                     | 6.0   | 1.364 up    | 2.923 up   | 2.143 up |
| <i>lmo0986</i> | similar to antibiotic ABC transporter, ATP-binding protein,                              | 1.2   | 1.827 up    | 4.982 up   | 2.727 up |
| <i>lmo0987</i> | similar to <i>Streptococcus agalactiae</i> CylB protein                                  | 5.2   | 1.650 down  | 1.630 up   | 2.690 up |
| <i>lmo1068</i> | hypothetical protein lmo1068                                                             | 6.0   | 1.097 up    | 2.346 up   | 2.138 up |
| <i>lmo1799</i> | putative peptidoglycan bound protein (LPXTG motif)                                       | 1.8   | 3.006 down  | 1.076 down | 2.791 up |
| <i>lmo2175</i> | similar to dehydrogenase                                                                 | 2.1.1 | 3.096 up    | 9.370 up   | 3.026 up |
| <i>lmo2254</i> | similar to unknown proteins                                                              | 5.2   | 14.388 down | 4.606 down | 3.123 up |
| <i>lmo2799</i> | similar to phosphotransferase system mannitol-specific enzyme IIBC                       | 1.2   | 4.085 up    | 8.859 up   | 2.168 up |
| <i>purE</i>    | phosphoribosylaminoimidazole carboxylase I                                               | 2.3   | 13.106 down | 5.335 down | 2.456 up |
